# Supplementary material for: Resolvin E1-ChemR23 Axis Regulates the Hepatic Metabolic and Inflammatory Transcriptional Landscape in Obesity at the Whole Genome and Exon Level
Source: Front Nutr. 2021 Dec 24;8:799492. doi: 10.3389/fnut.2021.799492 (PMC8740313; doi:10.3389/fnut.2021.799492)
Supplement: Supplementary file 8 [file Data_Sheet_8.XLSX]

## Sheet: DESeq2_results_ChemR23_KOs_HF+V
GeneID	baseMean	log2FoldChange	lfcSE	pvalue	padj	10-2L KO HF veh	10RL KO HF veh	10R KO HF veh	23L KO HF veh	31L KO HF veh	31N KO HF veh	31R KO HF veh	12-2L KO HF RvE1	12L KO HF RvE1	12RL KO HF RvE1	15-2L KO HF RvE1	15R KO HF RvE1	23-2L KO HF RvE1	23RL KO HF RvE1
Zfp445	4808.69	-0.816531	0.166269	3.71e-08	0.000536717	4459.3	5506.84	6315.34	5126.24	7054.52	7969.49	7179.57	3733.21	2653.93	2765.48	3322.72	3149.1	4713.11	3372.76
Nptx1	21.9231	2.01225	0.566838	1.64e-05	0.0485687	8.52514	10.4415	15.2081	1.77809	1.3238	5.34029	8.96886	88.0474	7.32725	25.4776	37.1414	20.2993	12.3541	64.6899
Ces2b	12.9009	-2.79e-06	0.0014427	2.69e-05	0.0485687	1.31156	16.7064	0	35.5618	9.26659	87.2247	23.5433	0.652203	1.46545	1.15807	0	0	3.08854	0.634215
Cyp21a1	55.4509	-5.19e-06	0.0014427	2.05e-05	0.0485687	22.2965	27.1479	27.2144	101.351	70.1613	377.38	57.1765	20.8705	2.9309	5.79037	9.9996	17.5927	26.2526	10.1474
Rrs1	767.171	-0.434863	0.128839	2.52e-05	0.0485687	868.908	722.551	930.093	1004.62	922.687	774.935	1072.9	749.381	592.042	545.453	562.12	579.207	738.16	677.342
Cabyr	178.762	-0.658133	0.19129	2.04e-05	0.0485687	178.372	170.196	198.505	256.045	189.303	307.363	270.187	163.051	124.563	105.385	105.71	128.562	176.047	129.38
Foxq1	1080.79	-1.42907	0.394009	9.99e-06	0.0485687	1701.09	221.36	1419.95	1520.27	2479.47	1374.23	2698.51	570.025	596.438	848.868	324.987	518.309	291.867	565.72
Hist1h1d	44.0259	1.19325	0.360163	3.67e-05	0.0514537	41.9699	25.0596	47.225	10.6685	9.26659	18.9877	15.6955	97.1783	45.4289	44.0068	67.8544	50.0716	61.7707	81.1795
Onecut1	821.531	-6.45e-06	0.0014427	3.3e-05	0.0514537	854.481	282.964	2492.52	158.25	648.661	595.145	4879.06	187.834	213.956	320.787	373.556	186.754	123.541	183.922
Cish	516.968	-2.11705	0.680012	5.56e-05	0.0670091	1029.57	64.7372	1433.56	302.275	913.421	455.111	1939.52	141.528	79.1343	178.343	427.84	60.8979	91.1118	120.501
Cd19	14.5977	1.36905	0.442358	7.92e-05	0.0797208	12.4598	9.39734	8.80466	0	2.6476	5.34029	10.09	24.1315	36.6362	20.8453	34.2843	14.8862	7.72134	17.1238
Rnf144b	1685.15	-0.612604	0.202863	8.16e-05	0.0797208	1628.96	1373.06	1808.16	2073.25	2753.5	2238.17	2816.22	1227.45	1082.97	1013.31	1013.53	1400.65	1768.19	1394.64
Ppp4r4	669.745	-0.775024	0.256993	8.27e-05	0.0797208	579.709	438.543	641.94	1006.4	1212.6	1239.54	1011.24	533.502	389.81	423.855	459.981	598.153	313.486	527.667
Cyp4a14	23252.3	1.48774	0.505043	0.000106996	0.0871125	15796.4	11785.3	19105.3	6689.18	12565.5	2145.02	6113.4	24822.2	85683.4	40147	25841.1	41231.9	5655.11	27951.8
Bbc3	265.783	0.591695	0.201055	0.000105909	0.0871125	222.965	266.258	197.705	160.028	195.922	198.777	171.529	268.055	438.17	290.677	451.41	372.154	264.07	223.244
Cbfb	512.661	-0.419656	0.144212	0.000113345	0.0871125	448.553	548.178	661.15	622.332	651.309	635.494	634.547	365.234	517.304	349.738	464.981	392.453	511.153	374.821
Thap2	346.68	-0.480101	0.164742	0.000114431	0.0871125	381.664	368.585	400.212	330.725	483.186	593.959	338.574	260.881	276.97	302.257	229.991	335.615	257.893	293.007
Pde6c	16.6661	0.990133	0.351003	0.000160478	0.0982486	9.8367	15.6622	12.0064	12.4466	5.29519	10.0872	5.60554	28.0447	33.7053	23.1615	22.8562	29.7723	7.72134	17.1238
Dennd3	116.834	0.584454	0.208353	0.000163023	0.0982486	111.483	76.2229	96.0509	103.129	43.6853	84.2579	108.747	186.53	112.84	144.759	143.566	121.796	138.984	163.627
Ugcg	712.213	-0.342203	0.12012	0.000138104	0.0982486	801.363	623.357	816.432	801.919	889.592	974.899	778.049	541.329	703.416	647.363	644.26	539.961	608.441	600.602
Taf2	435.489	-0.561445	0.198539	0.000145514	0.0982486	351.498	373.805	431.428	536.983	595.709	784.429	672.664	310.449	361.966	333.525	334.272	303.136	386.067	320.913
Cxcl1	1720.3	-2.05079	0.73949	0.000150088	0.0982486	577.086	382.159	332.976	6484.7	3093.72	7256.86	2281.45	382.843	795.739	522.291	802.111	598.153	302.676	271.444
Cdh4	58.158	-0.864459	0.315866	0.00017437	0.100884	59.0202	30.2803	74.4394	112.02	115.17	63.4901	93.0519	28.0447	41.0326	38.2164	27.1418	33.8322	64.8592	33.6134
Pla2g15	510.827	0.297934	0.109011	0.00019543	0.108719	522.657	478.22	449.838	360.952	459.358	423.069	432.747	568.721	537.82	581.353	554.263	654.991	500.343	627.239
Rab36	157.774	1.03592	0.387901	0.000231417	0.113713	108.204	170.196	120.064	40.8961	43.6853	65.8635	99.7786	222.401	334.123	309.206	240.705	212.466	61.7707	179.483
Rpl9	98.2657	-0.435847	0.164316	0.000234333	0.113713	96.3997	90.841	114.461	122.688	123.113	113.333	152.471	76.96	95.2542	77.591	81.4253	64.9578	92.6561	73.5689
Frs3	108.519	0.75517	0.290509	0.000281601	0.117033	76.7263	95.0176	93.6496	60.4551	47.6567	73.5773	75.1142	114.136	191.974	135.495	236.419	161.041	67.9478	90.0585
Arfgap3	213.758	0.616191	0.234027	0.000255546	0.117033	211.161	220.315	152.081	138.691	117.818	127.574	144.623	218.488	266.712	440.068	274.989	272.011	179.135	228.952
Cxcl2	11.3757	-6.74e-06	0.0014427	0.000271642	0.117033	26.2312	9.39734	8.80466	28.4495	11.9142	29.0749	12.3322	6.52203	1.46545	3.47422	0	1.35329	13.8984	6.34215
Homer2	1192.44	-0.553139	0.213905	0.000283196	0.117033	979.735	945.999	1483.99	1225.1	2037.33	1915.98	1690.63	855.038	710.743	973.94	805.682	1108.34	1076.35	885.364
Bcl3	727.287	-0.927469	0.355495	0.000261318	0.117033	673.486	318.465	550.692	1548.72	1910.24	927.43	1074.02	540.024	496.788	569.773	296.417	412.752	365.991	497.225
Shf	201.349	0.556558	0.215614	0.000297532	0.119542	188.865	195.256	173.692	117.354	141.646	118.673	145.744	238.054	202.232	272.147	356.414	286.897	149.794	232.123
Atf5	9068.51	0.513076	0.206085	0.000326532	0.121101	9125.18	7813.37	8006.64	6113.08	7126.01	5404.37	5975.5	9536.51	12702.5	14509.5	12338.8	12611.3	6413.34	9283
Rgs3	213.323	-9e-06	0.0014427	0.000312812	0.121101	282.641	98.15	489.859	183.143	274.026	210.051	550.464	148.05	131.89	188.766	150.708	64.9578	67.9478	145.869
Etv6	708.563	-0.468446	0.184249	0.000322896	0.121101	725.948	639.019	788.418	1065.08	1006.09	779.088	942.851	673.726	433.773	557.034	399.27	554.848	650.137	704.613
Slc13a1	7.49315	-5e-06	0.0014427	0.000383187	0.135988	3.93468	2.0883	16.0085	1.77809	22.5046	25.5147	17.9377	1.30441	4.39635	0	5.71406	0	3.08854	0.634215
Pex26	1833.84	-0.618467	0.251191	0.000385475	0.135988	1708.96	1033.71	2027.47	2604.9	2615.83	2481.45	3720.96	1207.23	1635.44	1292.41	1600.65	1393.89	1170.55	1180.27
Arsg	1061.28	0.409155	0.167281	0.000410742	0.138162	862.351	1221.65	794.02	769.913	811.488	938.704	723.114	990.696	1676.47	1320.2	1188.52	1319.45	1079.44	1161.88
B3galt1	2298.96	-0.954797	0.39224	0.000403498	0.138162	1941.11	1288.48	3589.1	1246.44	4391.04	6916.26	3031.47	907.867	1159.17	1240.3	1997.06	1550.87	1910.26	1016.01
Cyp4a10	13599.2	0.925253	0.371369	0.000442443	0.141326	8076.59	8034.73	10406.3	10048	12389.4	4758.79	5891.42	11537.5	37585.9	28372.8	14336.6	20362.9	6797.87	11790.7
Klhl36	198.634	0.483615	0.200926	0.000458669	0.141326	177.061	174.373	195.303	108.464	156.208	157.835	127.806	195.661	312.141	238.563	319.987	232.765	211.565	173.141
Zfp395	927.681	0.347575	0.14534	0.000469003	0.141326	919.403	739.258	661.951	851.705	823.403	734.586	787.017	989.392	1019.95	1526.34	999.96	990.606	1005.32	938.638
Cyp2c69	30.7829	-0.695759	0.290517	0.000464432	0.141326	22.2965	49.075	48.8259	39.118	37.0664	56.3697	24.6644	20.2183	23.4472	23.1615	23.5705	17.5927	27.7968	17.758
Steap4	6918.81	-0.720351	0.299024	0.00043561	0.141326	10248.5	4583.81	6560.27	9420.33	16069.6	9223.27	7046.16	6677.25	3524.41	3039.94	3813.42	4444.19	5281.4	6930.7
Mettl7a2	38.5009	-1.48e-05	0.00144271	0.000550587	0.156151	32.1332	44.8984	44.0233	67.5675	60.8947	48.6559	45.9654	24.1315	33.7053	23.1615	13.5709	25.7124	44.7838	29.8081
Camk4	40.7388	-0.809505	0.348782	0.000541994	0.156151	35.4121	31.3245	55.2292	46.2304	41.0377	99.6853	71.7509	15.6529	21.9817	26.6357	38.5699	33.8322	33.9739	19.0264
Nrep	612.43	-1.03552	0.449415	0.00054482	0.156151	782.345	813.392	1232.65	360.952	444.796	497.833	1987.72	158.485	250.592	419.223	701.4	332.909	415.408	176.312
Stx1a	11.6613	0.871214	0.374632	0.000626834	0.167899	9.8367	7.30904	7.20381	10.6685	5.29519	6.52702	6.72664	23.4793	13.189	16.213	17.1422	9.47301	9.26561	20.9291
Agtr1a	1711.67	0.253642	0.109611	0.000614739	0.167899	1667.65	1525.5	1599.25	1536.27	1499.86	1323.2	1504.53	1701.6	1995.94	2199.18	2017.06	2069.18	1559.71	1764.39
Nmrk1	990.646	-1.86e-05	0.00144271	0.000623334	0.167899	958.75	872.909	1168.62	1150.42	1409.85	1392.03	1469.77	698.509	704.881	499.13	959.961	1054.21	938.915	591.088
Gmppa	327.276	0.379699	0.168239	0.000651074	0.171221	310.84	327.863	257.736	256.045	203.865	243.28	308.305	374.365	416.188	427.329	480.695	368.094	296.499	310.765
Col20a1	34.2191	-0.791826	0.358118	0.000688289	0.177775	20.985	26.1037	31.2165	46.2304	56.9233	77.1375	61.6609	20.8705	16.1199	30.1099	19.9992	27.0657	26.2526	18.3922
Zfp84	305.764	-3.34e-05	0.00144275	0.000755255	0.188345	320.676	321.598	368.195	280.938	360.073	407.049	339.696	262.186	233.007	301.099	255.704	296.37	245.539	288.568
Dapk1	1304.53	-0.331926	0.152179	0.000749203	0.188345	1457.14	1265.51	1452.77	1554.05	1791.1	1271.58	1699.6	1267.23	792.808	1085.12	1192.09	966.247	1195.26	1272.87
Rpusd1	37.5229	0.606189	0.277856	0.000823315	0.192071	43.2815	35.5011	32.8174	12.4466	17.2094	21.3611	28.0277	55.4373	36.6362	47.481	49.998	50.0716	38.6067	56.4451
Six5	147.813	0.494949	0.22929	0.000811211	0.192071	118.696	140.96	143.276	64.0113	112.523	106.806	119.958	183.921	165.596	216.56	239.276	194.873	105.01	157.92
Slfn1	18.7363	-1.05e-05	0.0014427	0.00079177	0.192071	37.3795	26.1037	14.4076	26.6714	19.857	25.5147	23.5433	10.4352	13.189	6.94845	7.14257	12.1796	26.2526	12.6843
Tro	65.1155	-0.562731	0.258194	0.000800372	0.192071	78.6936	72.0463	75.2398	69.3455	76.7803	122.827	76.2353	75.0033	27.8435	47.481	47.8552	56.838	30.8854	54.5425
Hist1h1e	64.5796	0.681331	0.322636	0.000868804	0.197797	32.1332	55.3399	68.036	21.3371	35.7426	28.4815	73.9931	73.0467	77.6688	113.491	96.4247	78.4906	97.2889	52.6398
Klf6	676.818	1.66e-05	0.00144271	0.000925278	0.197797	870.22	654.681	477.853	1379.8	1048.45	581.498	834.104	499.588	458.686	501.446	509.265	437.112	5213.45	569.525
Btbd1	1150.57	-0.270501	0.13259	0.000925098	0.197797	1161.39	1207.04	1176.62	1369.13	1494.57	1517.83	1126.71	920.258	893.924	992.47	959.247	1025.79	1275.57	987.473
Trim24	727.752	-0.33106	0.1604	0.0009546	0.197797	832.185	730.904	798.823	729.017	1117.29	898.355	753.384	665.899	523.166	464.388	642.117	641.458	756.691	634.849
Krit1	428.8	-0.354723	0.169893	0.0009134	0.197797	369.204	485.529	489.859	389.402	522.9	723.312	498.893	390.67	364.897	346.264	325.701	358.621	378.346	359.6
Chordc1	786.12	-0.398266	0.192962	0.000948366	0.197797	689.225	753.876	870.861	830.368	1333.06	1209.87	806.076	682.204	622.816	628.834	569.977	568.38	801.475	638.654
2310044G17Rik	1918.19	-0.436476	0.207909	0.000880161	0.197797	1750.28	1770.88	1772.94	2768.49	2805.13	2637.51	2555	1775.3	1307.18	1168.5	1320.66	1477.79	2186.68	1558.27
Phlda1	3505.54	-0.764765	0.374225	0.000957259	0.197797	5865.3	1467.03	6716.36	2807.61	4727.28	4052.09	7179.57	2407.93	3100.89	3651.41	1589.94	2209.92	1309.54	1992.7
Chpf2	895.932	0.481305	0.234459	0.000983896	0.200438	956.127	769.538	772.409	672.118	569.233	488.933	683.876	1166.79	1463.98	1232.19	1170.67	878.283	586.822	1132.07
Marcksl1-ps4	447.199	-1.42e-05	0.00144271	0.00103532	0.205136	476.752	373.805	586.711	369.843	884.297	719.752	535.889	288.926	230.076	240.879	522.122	303.136	443.205	285.397
Bdh2	68.3538	-1.98e-05	0.00144271	0.00103046	0.205136	60.9875	74.1346	74.4394	87.1264	87.3707	101.465	88.5675	53.4806	35.1708	50.9553	69.2829	52.7782	57.1379	64.0557
Tet2	554.494	-0.360275	0.17915	0.00105674	0.20655	471.506	515.81	718.781	668.562	656.604	626	866.616	526.328	422.05	391.429	489.98	380.274	559.025	469.953
Prtn3	61.5575	1.17762	0.61947	0.00127122	0.210633	64.9222	62.6489	25.6136	12.4466	15.8856	25.5147	5.60554	26.7403	106.978	70.6425	134.28	194.873	86.479	29.1739
1700056E22Rik	36.8119	0.655993	0.33686	0.00128122	0.210633	40.6584	39.6777	31.2165	14.2247	17.2094	16.0209	21.301	65.2203	33.7053	52.1133	37.1414	43.3052	40.151	63.4215
Mras	155.255	0.468557	0.241907	0.00125726	0.210633	156.731	151.402	156.083	81.7922	72.8089	101.465	130.048	214.575	191.974	217.718	207.849	186.754	120.453	183.922
Neurl2	68.867	0.442853	0.226105	0.00122393	0.210633	74.7589	77.267	55.2292	46.2304	45.0091	40.9422	44.8443	103.7	82.0652	79.9071	90.7106	73.0775	67.9478	82.4479
BB123696	16.2103	-4.61e-06	0.0014427	0.00125089	0.210633	7.86936	5.22075	10.4055	33.7837	59.5709	49.8427	15.6955	3.26102	2.9309	0	3.57128	12.1796	20.0755	2.53686
Ugt2b37	170.6	-7.13e-06	0.0014427	0.00113757	0.210633	114.761	293.406	110.458	627.666	186.656	325.757	84.0831	25.4359	79.1343	137.811	139.994	106.91	118.909	37.4187
Ikzf4	21.5427	-7.37e-06	0.0014427	0.00120282	0.210633	18.3618	10.4415	39.2208	19.559	23.8284	21.3611	87.4464	9.78305	19.0508	16.213	12.1424	4.05986	6.17707	13.9527
Tnfsf14	7.29361	-8.31e-06	0.0014427	0.00111328	0.210633	9.18092	4.1766	12.0064	7.11236	11.9142	13.054	16.8166	3.91322	1.46545	1.15807	3.57128	6.76643	4.6328	6.34215
Hmox1	673.682	-8.47e-06	0.0014427	0.00128151	0.210633	880.712	376.938	344.182	2752.48	953.135	579.124	692.844	375.669	417.653	466.704	307.845	261.184	554.392	468.685
Pnpla3	20.3004	-1.02e-05	0.0014427	0.00118402	0.210633	21.6407	13.5739	20.0106	26.6714	21.1808	33.8218	54.9343	13.0441	10.2581	10.4227	12.1424	8.11972	23.164	15.2212
Med1	944.075	-0.337486	0.173841	0.00119055	0.210633	872.187	887.527	1101.38	999.287	1141.11	1313.12	1330.75	1018.09	657.987	706.425	678.544	738.895	875.6	896.146
Amn1	193.173	-0.420856	0.219134	0.00121494	0.210633	206.571	209.874	218.516	279.16	293.883	225.479	178.256	126.527	184.647	130.862	152.137	159.688	231.64	107.182
Slc41a1	242.461	-0.431834	0.222194	0.00120434	0.210633	247.885	193.168	298.558	330.725	301.826	334.658	330.727	234.141	150.941	259.409	130.709	179.987	168.325	233.391
Hspa1b	547.982	-1.03268	0.541822	0.00121216	0.210633	628.893	244.331	425.025	1052.63	1977.75	637.868	595.308	442.846	106.978	196.873	102.139	262.538	569.835	428.729
Slc2a4	34.9097	-3.86e-06	0.0014427	0.00131222	0.213257	12.4598	11.4856	29.6157	44.4523	128.408	77.7308	103.142	7.82644	4.39635	4.6323	1.42851	5.41315	46.328	11.4159
B4galt1	2489.73	-0.518397	0.277815	0.00132708	0.213276	2426.39	1514.02	2582.17	3749.99	4492.97	3532.9	3327.45	1305.06	1946.12	1829.76	2198.48	1902.72	2645.33	1402.88
Vasn	333.179	0.403729	0.21374	0.00134912	0.214436	325.267	415.571	283.35	247.155	222.398	179.79	221.979	435.019	335.588	411.116	424.983	407.339	335.106	419.85
Fry	77.8937	0.371781	0.196498	0.00137393	0.216005	76.7263	60.5606	72.0381	46.2304	62.2185	67.0503	61.6609	84.1342	118.701	108.859	95.7104	87.9636	61.7707	86.8874
Nup62	347.785	-2.32e-05	0.00144272	0.00146709	0.218908	438.717	295.494	348.184	373.399	530.843	431.376	396.872	311.753	309.21	274.464	295.702	343.735	208.476	310.765
Krr1	447.66	-0.219981	0.119575	0.00142555	0.218908	419.699	495.971	516.273	574.323	510.986	511.481	434.99	416.106	359.035	429.646	362.843	385.687	449.382	400.824
Cebpg	2641.75	-0.220895	0.12186	0.0014402	0.218908	2959.53	2708.52	3372.99	2496.44	3427.31	2847.56	2626.75	2204.45	2420.92	2601.03	2142.77	2219.39	2651.51	2305.37
Cry1	239.736	-0.702755	0.393483	0.00146806	0.218908	219.031	159.755	228.921	311.166	726.765	317.45	260.097	105.657	159.734	136.653	126.423	200.286	282.601	121.769
Smad9	221.508	-0.714491	0.393719	0.00145423	0.218908	215.096	151.402	268.942	227.596	395.816	311.517	488.803	67.1769	194.905	204.979	247.133	100.143	145.161	82.4479
Nfasc	13.3581	0.841949	0.477883	0.00177678	0.219834	9.18092	8.35319	8.80466	5.33427	7.94279	10.0872	6.72664	15.0007	26.3781	25.4776	33.5701	10.8263	12.3541	6.97636
Trib3	296.263	0.753416	0.441222	0.00177523	0.219834	234.113	484.485	164.087	161.806	56.9233	90.7849	153.592	355.451	461.617	445.859	464.267	301.783	446.293	326.621
Rtn4rl1	467.086	0.736765	0.440724	0.00188314	0.219834	497.081	466.735	402.613	126.244	223.722	122.827	298.215	757.208	681.434	795.597	649.26	645.518	199.211	673.536
1700030C10Rik	53.2874	0.643998	0.378405	0.00183914	0.219834	40.6584	58.4723	49.6263	19.559	27.7998	26.7014	34.7543	54.1329	105.512	84.5394	84.2823	85.2571	27.7968	46.9319
Fbxo21	2047.09	0.619339	0.339476	0.00155766	0.219834	1999.47	2561.3	1612.05	1075.74	782.365	862.753	1343.09	2522.07	2715.48	3679.2	2717.75	2720.11	1267.84	2800.06
Fam89a	134.057	0.593905	0.326952	0.00153137	0.219834	139.681	130.519	128.868	48.0085	72.8089	60.5232	96.4152	176.747	200.767	214.244	136.423	217.879	86.479	167.433
Zscan2	118.895	0.471603	0.26354	0.00158698	0.219834	97.0554	121.121	98.4521	74.6798	111.199	81.8844	61.6609	120.658	184.647	170.237	184.278	169.161	88.0233	101.474
1810019J16Rik	127.494	0.451415	0.253612	0.0016479	0.219834	125.254	110.68	110.458	72.9017	84.7231	101.465	94.173	131.745	162.665	207.295	197.849	170.514	75.6691	139.527
Gm4952	2723.67	0.412102	0.233395	0.00165571	0.219834	2402.12	2651.09	2562.96	1593.17	1709.02	2069.06	2340.87	2501.85	4484.28	3891.13	3475.57	3640.34	2052.33	2757.57
Cbx2	349.932	0.351342	0.203983	0.00180007	0.219834	320.021	300.715	321.77	312.944	300.502	210.645	271.308	405.67	518.769	447.017	424.269	461.471	242.45	361.503
Pcnxl4	241.422	0.33912	0.199551	0.00187367	0.219834	268.214	230.757	244.93	161.806	149.589	185.13	167.045	253.707	288.694	308.048	330.701	307.196	242.45	241.636
Ddit4	530.611	1.11e-06	0.00144269	0.00184072	0.219834	165.912	232.845	138.473	3483.28	1293.35	362.546	368.844	200.879	206.628	71.8006	125.709	227.352	8303.53	211.194
Myc	186.017	-6.72e-06	0.0014427	0.00172017	0.219834	722.67	95.0176	285.751	161.806	113.847	111.553	403.599	132.397	45.4289	84.5394	66.4259	40.5986	188.401	152.212
Sspo	18.038	-7.92e-06	0.0014427	0.00163062	0.219834	9.8367	20.883	15.2081	24.8933	19.857	64.6768	24.6644	15.0007	11.7236	12.7388	12.8566	5.41315	4.6328	10.1474
Pi16	8.45514	-8.04e-06	0.0014427	0.00156539	0.219834	10.4925	3.13245	12.0064	17.7809	17.2094	11.8673	11.2111	4.56542	8.7927	2.31615	2.14277	4.05986	7.72134	5.07372
Fkbp5	3947.62	-9.63e-06	0.0014427	0.00182405	0.219834	3053.31	2533.11	3031.21	9125.16	8091.05	6009.01	5080.86	1865.95	2535.23	1789.22	2089.2	2824.31	5514.58	1724.43
Usp38	1001.38	-0.213629	0.121666	0.00167279	0.219834	1003.34	966.882	1094.18	1057.96	1217.89	1189.1	1202.95	926.781	822.117	971.624	752.827	967.6	836.993	1009.04
Cbll1	323.098	-0.241915	0.138599	0.00170854	0.219834	321.988	339.348	382.603	334.281	375.959	436.717	331.848	308.492	304.814	259.409	249.276	328.849	251.716	298.081
Gtpbp4	491.729	-0.255319	0.151648	0.00186507	0.219834	457.734	476.132	547.49	567.211	583.795	558.357	681.633	454.586	351.708	444.7	422.126	392.453	532.772	413.508
Mphosph10	325.164	-0.257239	0.146392	0.00162876	0.219834	308.217	338.304	407.416	376.955	401.111	408.235	315.031	303.927	331.192	313.838	265.704	285.544	264.07	232.757
Zbtb20	1030.76	-0.403388	0.226971	0.00162038	0.219834	1122.04	1079.65	995.727	1347.79	1510.45	1343.97	1199.58	1065.05	502.649	815.284	585.691	791.673	1053.19	1017.91
Phf8	354.039	-0.424227	0.248787	0.00180621	0.219834	306.905	291.318	439.433	389.402	399.787	475.879	684.997	373.06	213.956	275.622	276.417	251.711	250.171	327.889
Fam126b	3489.65	-0.430991	0.246026	0.00172408	0.219834	2491.31	3469.71	4574.42	4199.85	4177.91	5663.08	4844.31	1932.48	3429.15	2894.03	2385.62	2956.93	3729.41	2106.86
Mtss1	8240.12	-0.462617	0.258881	0.00154493	0.219834	6843.06	7022.95	8104.29	12377.3	12043.9	12002	11902.8	6105.27	5354.75	5263.45	5607.63	6101.97	10882.5	5749.79
Ect2	20.0404	-0.670399	0.365355	0.00151621	0.219834	17.0503	27.1479	26.414	19.559	35.7426	31.4484	26.9066	9.78305	13.189	18.5292	24.999	9.47301	10.8099	9.51322
Nfe2l3	20.1112	-0.679697	0.390293	0.0017059	0.219834	17.0503	16.7064	28.0148	44.4523	11.9142	30.2616	38.1177	13.6963	17.5854	15.055	12.1424	14.8862	7.72134	13.9527
Saa1	13538.4	-0.935541	0.573624	0.00188463	0.219834	25321.6	11072.2	6605.1	21786.9	33881.3	28398.5	8663.92	6256.58	6049.38	1588.88	17972.8	11281	5503.77	5155.53
Prr22	8.01778	0.863142	0.509987	0.00204601	0.220412	6.5578	5.22075	7.20381	3.55618	3.97139	2.37346	4.48443	11.0875	17.5854	10.4227	14.2851	13.5329	3.08854	8.87901
Slc22a17	27.0183	0.544817	0.324037	0.00201991	0.220412	31.4774	28.192	20.811	7.11236	13.238	16.6142	19.0588	36.5234	43.9635	31.268	37.1414	24.3592	35.5182	32.9792
Tbkbp1	401.725	0.36732	0.221744	0.00200824	0.220412	485.933	319.51	397.01	263.157	267.407	303.803	270.187	510.023	489.46	431.962	567.12	504.776	316.575	497.225
Hist1h1c	3673.41	1.67e-05	0.0014427	0.00196593	0.220412	4069.77	3508.34	3594.7	2117.71	3124.16	2064.91	2047.14	4384.76	5312.26	4845.38	4753.38	4767.63	2890.87	3946.72
Nrg4	433.883	-9.76e-06	0.0014427	0.00204442	0.220412	396.747	329.951	304.961	730.795	830.022	906.662	526.92	264.142	222.748	162.13	176.421	319.376	626.973	276.518
Mir568	137.241	-1.59e-05	0.00144271	0.00193075	0.220412	123.287	164.976	121.664	216.927	199.894	207.084	139.017	136.963	76.2034	97.2782	65.7116	115.029	148.25	109.085
Rlim	2260.5	-2.46e-05	0.00144272	0.00190704	0.220412	2072.92	2129.02	2342.84	2916.07	3151.96	2973.35	2572.94	1639.64	1820.09	2299.94	1499.94	2052.94	2351.92	1823.37
Slc30a1	2061.76	-0.3024	0.185406	0.00200846	0.220412	1963.41	1693.61	2085.9	2956.96	3014.29	2701	2165.98	1610.94	1644.23	2132.01	1712.07	1772.81	1721.86	1689.55
Otud4	1628.9	-0.309768	0.194814	0.00196824	0.220412	1431.57	1551.61	1692.9	2229.73	2268.99	2145.61	1845.34	1438.76	1242.7	1288.94	1022.82	1438.54	1806.79	1400.35
Pprc1	394.902	-0.412589	0.253592	0.00201747	0.220412	390.189	328.907	449.038	488.975	615.566	469.945	582.976	448.716	250.592	288.36	203.563	269.304	350.549	391.945
C4a	2177.63	-0.746003	0.470025	0.00205722	0.220412	1276.8	1374.1	1508	3068.98	2671.42	7351.2	3420.5	1271.8	975.99	1279.67	1231.38	1372.23	2563.48	1121.29
Slc25a30	569.807	-8.68e-06	0.0014427	0.00207357	0.220531	857.104	396.777	1491.99	426.742	467.301	369.073	1415.96	274.577	275.505	484.075	649.974	200.286	352.093	315.839
St3gal1	2467.33	-1.62e-05	0.0014427	0.00210056	0.221771	2680.83	1828.3	2871.92	3257.46	4951.01	2610.21	2603.21	2436.63	1603.2	2089.17	1485.65	1737.62	2019.9	2367.52
Poll	231.278	0.373488	0.234834	0.0021824	0.227927	226.244	223.448	192.102	131.579	164.151	182.756	196.194	195.009	339.984	325.419	362.128	267.951	214.653	216.267
Zfp689	88.0188	-2.42e-05	0.00144271	0.0021904	0.227927	104.925	96.0617	92.8492	90.6826	123.113	106.806	85.2042	74.3511	96.7197	70.6425	67.8544	69.0176	74.1248	79.9111
D7Ertd143e	140.086	-1.15e-05	0.00144269	0.00223162	0.229132	217.719	156.622	159.284	296.941	138.999	134.101	96.4152	113.483	126.029	101.911	99.996	123.149	84.9347	111.622
4833439L19Rik	2160.23	-0.326701	0.20773	0.00223366	0.229132	1958.81	1782.36	2260.4	3614.86	2823.66	2744.91	2390.2	1909.65	1632.51	1660.68	1517.8	1798.52	2189.77	1959.09
Plscr3	106.085	0.313244	0.200607	0.00225196	0.229383	98.367	113.812	77.6411	103.129	74.1327	70.0171	94.173	125.223	130.425	116.965	130.709	125.856	86.479	138.259
Igfbp5	333.612	0.625698	0.408866	0.00230792	0.231818	211.161	285.053	260.938	204.48	187.979	172.076	299.336	423.932	348.777	983.205	179.993	235.472	506.52	371.65
Elovl6	3307.24	-0.801016	0.523744	0.0022989	0.231818	2030.29	1731.2	2852.71	4100.28	7401.36	7587.95	6302.87	2607.51	989.179	1254.19	1005.67	1549.51	4007.37	2881.24
Stx2	424.94	0.295226	0.193622	0.00238275	0.236366	489.212	393.644	426.626	302.275	309.769	288.969	320.637	543.285	435.239	502.604	492.123	549.434	386.067	509.275
Nampt	2778.44	-0.428129	0.280008	0.00238588	0.236366	2571.97	2637.52	3115.25	4219.41	4388.39	3280.12	3370.05	1716.6	1632.51	1612.04	2229.2	2292.47	3886.92	1945.77
Arrdc1	61.7844	0.373249	0.244926	0.00241422	0.237072	50.4951	58.4723	56.8301	49.7865	41.0377	41.5356	56.0554	64.5681	71.807	76.4329	107.139	54.1315	58.6822	78.0084
Zfr	1619.3	-0.235393	0.15724	0.00244218	0.237072	1453.86	1578.75	1754.53	1877.66	2127.34	2121.28	1773.59	1442.67	1395.11	1405.9	1127.1	1419.6	1677.07	1515.77
Tacc1	1833.67	-0.237241	0.162545	0.00243194	0.237072	1907.66	1457.63	2277.21	1890.11	2086.31	2338.45	2444.01	1673.55	1370.2	1606.25	1537.08	1656.42	1667.81	1758.68
Capn10	479.791	0.449955	0.306508	0.00252843	0.239348	367.893	429.145	396.21	408.961	341.54	363.733	290.367	396.539	832.376	582.511	967.818	598.153	375.257	366.576
Pold2	114.402	0.316409	0.215397	0.0024908	0.239348	105.581	92.9293	89.6475	99.5731	79.4279	93.7517	107.626	101.091	121.632	162.13	152.137	143.448	157.515	95.1322
Tmcc1	1133.84	-2.38e-05	0.0014427	0.00253517	0.239348	1138.43	1095.31	1074.97	1271.33	1547.52	1610.99	1259	855.69	870.477	868.556	1148.53	1140.82	1087.16	905.025
Ppp1r10	818.531	-0.352748	0.241333	0.00252565	0.239348	1080.73	715.242	981.32	1219.77	614.242	1041.36	1106.53	804.166	545.147	868.556	546.407	702.356	543.582	690.026
Abca8a	1177.53	-0.494573	0.33317	0.00254837	0.239348	1024.33	933.469	1158.21	1906.11	1740.79	1873.85	1636.82	828.298	467.479	1171.97	657.831	779.493	1431.54	875.217
BC005561	706.182	-2.3e-05	0.00144271	0.00257351	0.24015	581.677	668.255	782.815	789.472	875.031	999.82	940.609	703.075	583.249	548.927	537.121	544.021	724.262	608.212
Klhdc3	1079.25	0.24507	0.169024	0.00262035	0.242954	1049.25	928.248	931.693	1011.73	961.078	821.217	906.976	1089.18	1434.68	1205.56	1521.37	1231.49	870.967	1146.03
Cyr61	568.497	1.1706	0.924534	0.00290117	0.249777	257.722	210.918	271.344	165.362	70.1613	188.097	615.488	346.32	313.606	902.14	1195.67	257.124	2884.69	280.323
Nr0b2	919.196	0.666568	0.492842	0.00288903	0.249777	328.546	786.244	851.651	552.986	530.843	745.86	477.592	577.2	1037.54	1345.68	3040.59	1292.39	739.704	561.914
Lrrc29	109.278	0.410223	0.293614	0.00274837	0.249777	92.465	96.0617	96.0509	72.9017	88.6945	61.1166	96.4152	108.918	180.25	115.807	174.279	166.454	69.492	110.988
Aimp2	223.023	0.303047	0.22461	0.00289942	0.249777	196.078	203.609	194.503	177.809	162.827	168.516	207.405	212.618	378.086	266.357	272.846	289.603	185.312	206.754
Sigirr	237.005	0.268206	0.19489	0.00284444	0.249777	243.294	199.432	204.909	211.593	181.36	194.03	192.83	235.445	291.625	260.567	371.414	285.544	206.932	239.099
Ndufaf3	169.361	0.26433	0.188761	0.00275017	0.249777	156.731	137.828	138.473	147.582	120.466	146.561	172.651	146.746	215.421	173.711	229.991	227.352	183.768	173.775
Mir290	8.79324	-8.2e-06	0.0014427	0.00280217	0.249777	17.7061	6.26489	10.4055	21.3371	14.5618	9.49384	6.72664	7.82644	2.9309	3.47422	5.71406	5.41315	6.17707	5.07372
Ptrhd1	721.037	-0.158983	0.113011	0.00286343	0.249777	747.589	646.328	746.795	851.705	826.05	835.458	810.561	680.9	655.056	627.676	614.261	664.464	699.553	688.123
Ppwd1	164.493	-0.232804	0.169112	0.0028606	0.249777	158.699	199.432	188.9	165.362	184.008	209.458	188.346	176.747	120.167	130.862	133.566	142.095	146.705	158.554
Ablim3	572.776	-0.544508	0.400469	0.00276767	0.249777	437.405	389.468	425.025	1362.02	880.326	771.968	862.132	364.581	435.239	328.893	447.125	316.669	673.301	324.718
Arid5b	1482.34	-0.691592	0.520882	0.00281692	0.249777	1261.06	828.01	1884.2	1354.91	2454.32	2070.25	4161.55	1018.74	441.1	772.435	642.117	717.242	2200.58	946.249
4930502E09Rik	6.46167	-0.808374	0.543578	0.00288826	0.249777	11.1483	10.4415	9.60509	10.6685	6.61899	8.30711	6.72664	5.86983	4.39635	2.31615	2.14277	4.05986	3.08854	5.07372
Gmppb	238.681	0.447833	0.339381	0.00297593	0.250255	203.292	250.596	207.31	179.587	123.113	167.922	146.865	192.4	382.482	457.439	351.414	290.957	213.109	175.043
Tirap	784.755	-0.279408	0.207772	0.00294391	0.250255	896.451	695.403	971.715	825.034	1162.29	906.069	844.194	771.556	627.213	658.944	626.403	793.026	447.838	760.424
Zdhhc13	115.023	-0.324097	0.251864	0.00296617	0.250255	118.696	97.1059	132.07	186.7	169.446	113.926	125.564	76.96	115.771	110.017	86.4251	97.4367	103.466	76.74
Gm14420	3645.31	-0.497133	0.380696	0.00294242	0.250255	2949.04	3895.72	5400.46	4286.98	5252.83	6102.76	4235.54	1687.9	3307.52	1573.82	3783.42	2656.5	4433.59	1468.21
3010026O09Rik	95.153	0.41809	0.31466	0.00301652	0.250326	103.613	93.9734	64.8343	55.1208	52.9519	57.5564	91.9308	108.266	131.89	126.23	174.279	100.143	78.7577	92.5954
BC004004	1195.11	0.251262	0.18245	0.00302679	0.250326	1276.8	1188.24	1082.97	1036.63	783.689	909.629	995.543	1123.09	1611.99	1429.06	1514.94	1354.64	1280.2	1144.12
Serpina5	5.30708	-5.01e-06	0.0014427	0.00306447	0.250326	3.93468	3.13245	2.40127	17.7809	9.26659	16.6142	5.60554	0.652203	0	4.6323	2.85703	2.70657	1.54427	3.17107
Rdh18-ps	220.414	-2.05e-05	0.00144269	0.00303082	0.250326	196.078	226.58	215.314	277.382	307.121	299.056	243.28	157.833	209.559	211.928	191.421	177.281	223.919	149.041
Kpna2	135.213	-0.228911	0.181954	0.00312019	0.250326	135.091	151.402	142.475	168.919	169.446	132.32	163.682	110.875	136.287	122.756	92.8534	115.029	128.174	123.672
Nufip2	2486.45	-0.272555	0.215746	0.00313254	0.250326	1996.85	2628.12	2810.29	2638.69	3228.74	3744.73	2899.18	2560.55	1878.71	1988.41	1635.65	2123.31	2214.48	2462.66
Tle4	276.004	-0.344489	0.271836	0.0031095	0.250326	202.636	251.64	329.775	291.607	366.692	475.285	366.602	211.314	206.628	250.144	249.99	200.286	282.601	178.849
Gm14403	2324.4	-0.576548	0.46733	0.00312134	0.250326	2100.46	2347.25	3191.29	3266.35	3051.35	4486.43	2752.32	765.686	1846.47	1063.11	1891.35	1446.66	3585.79	747.105
Klf10	2160.67	-0.728388	0.603432	0.00312877	0.250326	1413.86	1215.39	1953.03	5080.01	2635.68	1853.08	6681.8	966.565	1670.61	767.803	925.677	1066.39	2995.88	1023.62
Sytl1	146.358	0.353217	0.276547	0.00317008	0.250561	135.091	137.828	104.055	142.247	90.0183	147.748	75.1142	168.921	155.338	181.818	199.992	238.178	120.453	152.212
Trim13	101.41	-1.98e-05	0.0014427	0.00317013	0.250561	99.0228	110.68	114.461	108.464	137.675	121.046	126.685	90.6562	115.771	69.4845	57.1406	94.7301	89.5675	84.3506
Tchh	73.6292	-7.45e-06	0.00144269	0.00322907	0.252461	91.8092	51.1633	80.0424	247.155	48.9805	65.2702	119.958	82.8298	24.9126	40.5326	20.7135	44.6585	63.315	49.4688
Dcun1d3	688.354	-0.290395	0.236844	0.00322491	0.252461	727.26	758.052	826.037	869.486	972.992	685.93	733.204	596.766	524.631	409.958	467.838	587.326	875.6	601.87
Dus3l	309.889	0.17523	0.139482	0.00326655	0.254019	290.511	291.318	282.55	302.275	243.579	271.168	288.125	372.408	342.915	363.635	364.985	332.909	271.791	320.279
Pola2	107.061	0.288708	0.235329	0.00341746	0.260159	118.04	103.371	82.4437	65.7894	74.1327	90.7849	97.5363	144.789	117.236	112.333	144.28	115.029	94.2003	138.893
Tcf3	379.319	0.199325	0.164114	0.00338877	0.260159	378.385	368.585	364.993	321.834	337.569	300.836	298.215	459.151	398.602	472.494	429.268	431.698	315.031	433.803
Adap2	1208.74	-2.05e-05	0.00144267	0.00339492	0.260159	1111.55	1137.08	1423.95	1266	1269.52	1469.17	1858.8	1233.32	1094.69	894.033	1072.81	963.54	1037.75	1090.22
Fem1b	835.584	-3.27e-05	0.00144271	0.00341047	0.260159	831.529	760.14	927.691	963.725	954.459	1041.36	922.671	709.597	663.849	810.652	733.542	721.302	801.475	856.19
2700069I18Rik	12.3056	0.594161	0.465789	0.00346417	0.260968	7.86936	6.26489	10.4055	8.89045	9.26659	9.49384	8.96886	18.2617	10.2581	16.213	17.1422	14.8862	7.72134	26.637
Traf4	1073.85	0.189671	0.160742	0.00346305	0.260968	1119.42	1001.34	1046.95	858.818	996.82	838.425	872.222	1110.05	1235.37	1358.42	1319.95	1174.65	963.623	1137.78
Gm15713	28.7551	-7.47e-06	0.00144269	0.00349747	0.262111	26.887	18.7947	56.0297	21.3371	46.3329	37.9754	60.5398	12.3919	19.0508	27.7938	28.5703	10.8263	27.7968	8.24479
Dusp8	80.5173	1.98e-06	0.00144269	0.00353461	0.263529	90.4976	56.384	68.8365	382.29	127.085	28.4815	71.7509	76.96	23.4472	40.5326	21.4277	12.1796	826.183	64.0557
Prph	10.0777	0.911764	1.00248	0.0037123	0.264281	2.62312	8.35319	0.800424	7.11236	3.97139	3.56019	10.09	11.7397	13.189	30.1099	5.71406	4.05986	30.8854	8.87901
Phgdh	9.14939	0.747661	0.669869	0.00373578	0.264281	2.62312	6.26489	3.2017	10.6685	1.3238	6.52702	10.09	18.2617	10.2581	17.3711	17.1422	6.76643	6.17707	11.4159
Tmem206	59.7833	0.317571	0.275144	0.00366398	0.264281	70.1685	54.2957	56.0297	37.3399	37.0664	47.4692	40.3599	71.7423	79.1343	70.6425	77.1397	62.2512	54.0494	79.2769
Sox12	128.736	0.279413	0.247486	0.00365755	0.264281	145.583	107.547	103.255	87.1264	86.0469	97.3119	133.412	147.398	124.563	188.766	154.994	152.921	117.364	156.017
Lrrc59	1937.69	0.236398	0.200465	0.00369966	0.264281	2063.74	1874.25	1791.35	1719.41	1495.89	1179.61	1701.84	2399.45	2239.21	2430.8	2026.35	2172.03	1701.78	2332.01
Llgl2	391.317	0.218787	0.197097	0.00366244	0.264281	346.908	392.6	308.163	366.287	324.331	321.604	352.028	489.152	376.621	497.972	482.838	466.884	299.588	453.464
Btbd19	58.6431	-3.57e-06	0.00144268	0.00376395	0.264281	93.7765	43.8543	84.8449	51.5646	58.2471	54.5896	128.927	46.9586	49.8253	47.481	59.9976	24.3592	41.6952	34.8818
Ttll8	53.0984	-6.03e-06	0.0014427	0.00366818	0.264281	34.7563	29.2362	39.2208	120.91	144.294	103.246	63.9031	11.7397	16.1199	18.5292	37.8556	17.5927	92.6561	13.3185
Rwdd4a	590.521	-0.151863	0.137924	0.00375813	0.264281	589.546	582.635	641.14	697.012	659.252	696.017	616.609	531.545	605.231	595.25	463.553	535.902	515.785	537.814
Plcxd2	4501.38	-0.372392	0.353864	0.00367874	0.264281	4253.39	4073.23	7287.86	2942.74	5189.29	7347.05	6992.35	2633.6	3747.16	4617.24	3984.13	3928.59	3232.15	2790.55
Saa4	29991.4	-0.375416	0.310107	0.00366294	0.264281	30190.8	27096.7	32755.7	39528.7	43842.9	47184.4	31292.3	20908.3	24459.8	15463.8	28445.3	38805.5	22764.1	17140.9
Gm4956	295.527	-0.54024	0.501628	0.00357563	0.264281	261.656	357.099	375.399	424.964	326.978	762.474	169.287	130.441	197.836	226.983	286.417	205.7	311.942	100.206
Pdia4	3564.88	0.217401	0.182666	0.00379134	0.264918	3762.87	3590.83	3517.86	3245.02	2361.66	2649.97	2893.58	3917.13	3915.68	4755.05	3915.56	4005.73	3803.53	3573.8
Fzd5	387.414	0.259855	0.247472	0.00387494	0.269123	335.759	323.686	427.426	280.938	311.093	301.43	331.848	453.281	391.275	618.412	318.559	461.471	389.155	479.466
Scarna17	18.2842	-1.07e-05	0.0014427	0.00388873	0.269123	15.7387	26.1037	30.4161	28.4495	23.8284	24.328	14.5744	17.6095	14.6545	13.8969	5.71406	12.1796	13.8984	14.5869
Mrpl42	154.553	-0.236116	0.254655	0.00395144	0.27216	166.568	175.417	168.889	211.593	194.598	153.088	159.197	118.701	140.683	155.182	98.5675	117.736	176.047	127.477
Cyp4b1	175.508	0.306896	0.314891	0.00400343	0.272853	182.963	123.21	188.9	136.913	104.58	151.901	119.958	173.486	253.523	251.302	236.419	132.622	194.578	206.754
Rian	8.34701	-6.26e-06	0.00144269	0.00401809	0.272853	3.2789	7.30904	13.6072	16.0028	7.94279	27.2948	8.96886	5.86983	4.39635	1.15807	4.9998	5.41315	6.17707	4.4395
Irf2	2005.19	-0.299158	0.326908	0.00401184	0.272853	1844.71	1788.63	2081.9	2462.66	2666.13	2918.76	2726.53	1852.26	1222.19	1430.22	1144.24	1806.64	2370.45	1757.41
Adam2	8.11289	-5.42e-06	0.00144269	0.00404647	0.273112	7.86936	12.5298	4.80254	17.7809	3.97139	24.9213	12.3322	4.56542	0	8.10652	4.28554	4.05986	7.72134	0.634215
Ndufaf4	1192.44	-2.84e-05	0.0014427	0.00405982	0.273112	1148.27	1320.85	1458.37	1417.14	1224.51	1540.97	1097.56	929.389	1203.13	1122.17	1001.39	1200.37	1057.82	972.251
Zfp259	809.274	-0.317371	0.357105	0.00407856	0.273112	1019.08	587.856	966.912	1153.98	716.175	989.733	1292.64	866.126	444.031	675.157	772.826	553.494	560.569	731.25
Stat1	1305.9	0.180032	0.174516	0.00411691	0.274341	1208.6	1377.23	1120.59	965.503	1056.39	1285.82	1193.98	1530.72	1452.26	1323.68	1658.5	1484.56	1173.64	1451.08
Sdr39u1	529.949	0.140062	0.146445	0.00413484	0.274341	478.719	552.355	461.044	535.205	471.272	450.364	467.502	598.07	543.682	585.986	588.548	626.572	491.077	568.891
Ankrd54	236.823	0.400581	0.481033	0.00422374	0.275498	198.701	174.373	208.911	144.025	177.389	196.404	163.682	193.052	439.635	339.316	459.267	299.076	160.604	161.091
Tes	34.4328	-1.09e-05	0.00144269	0.00422357	0.275498	48.5277	29.2362	38.4203	76.4579	31.7712	51.0294	28.0277	20.8705	20.5163	22.0034	24.999	17.5927	47.8723	24.7344
Rpl23a	207.836	-0.227556	0.251062	0.00419971	0.275498	210.505	216.139	221.717	279.16	252.845	234.379	229.827	152.616	193.439	220.034	129.995	198.933	211.565	158.554
Ddx5	7108.44	-0.271373	0.340326	0.00422847	0.275498	6262.7	7399.88	7103.76	10049.8	9654.46	9673.04	7769.27	7078.36	4808.14	4962.35	4276.26	5449.69	8050.27	6980.17
4933406I18Rik	15.8058	0.442482	0.742212	0.00456911	0.285144	9.8367	19.8388	12.0064	8.89045	10.5904	7.71375	11.2111	16.9573	14.6545	18.5292	26.4275	28.419	21.6197	14.5869
Rab3il1	71.6617	0.38051	0.4879	0.00444653	0.285144	84.5956	51.1633	65.6348	48.0085	30.4474	46.8758	59.4187	79.5688	92.3233	105.385	119.281	81.1972	41.6952	97.6691
Ptdss2	200.669	0.246373	0.375923	0.00455985	0.285144	222.309	208.83	190.501	158.25	129.732	126.387	151.349	204.14	234.472	244.354	283.56	243.592	179.135	232.757
Fam58b	185.994	0.215547	0.286378	0.00440127	0.285144	182.963	186.903	166.488	145.803	161.503	144.781	139.017	184.573	238.868	182.976	234.276	273.364	168.325	194.07
Sphk2	1599.09	0.210652	0.297261	0.0045664	0.285144	1597.48	1405.42	1424.75	1036.63	1309.24	1297.69	1663.72	1735.51	2061.89	2194.55	1886.35	1783.63	1292.55	1697.79
Fuk	243.061	2.63e-05	0.0014427	0.00443773	0.285144	238.048	219.271	208.911	199.146	207.836	199.371	244.401	320.884	231.541	268.673	294.274	296.37	211.565	262.565
Klrg2	6.59785	-7.03e-06	0.00144269	0.00457365	0.285144	3.2789	8.35319	13.6072	14.2247	6.61899	10.0872	8.96886	4.56542	2.9309	3.47422	3.57128	2.70657	6.17707	3.80529
Fam35a	1944.05	-9.51e-06	0.0014427	0.00448428	0.285144	1335.82	1534.9	1518.4	3390.82	3874.76	3592.23	2288.18	992.001	1398.04	925.301	1181.38	1370.88	2843	970.983
Spred1	440.546	-1.48e-05	0.00144269	0.00448294	0.285144	502.327	498.059	551.492	277.382	577.176	497.24	738.81	391.322	364.897	389.113	252.847	284.19	418.497	424.29
Dmxl2	962.809	-1.76e-05	0.0014427	0.00450843	0.285144	768.574	1079.65	1031.75	1134.42	1256.28	1338.04	1227.61	915.693	634.54	787.49	548.549	722.655	1097.97	936.101
Serpina3f	57.8324	-1.23e-05	0.0014427	0.00465008	0.288664	75.4147	51.1633	51.2271	74.6798	86.0469	112.739	44.8443	39.1322	60.0834	48.6391	52.1408	27.0657	50.9608	35.516
Pms2	53.0903	0.33316	0.648828	0.00475783	0.290368	47.8719	44.8984	52.0276	37.3399	22.5046	43.3157	42.6021	46.9586	80.5997	60.2199	101.424	58.1913	46.328	58.982
Retsat	7330.25	0.331091	0.29736	0.0047471	0.290368	7244.4	6190.76	6272.92	5801.91	5893.55	4441.93	6328.65	7159.88	13640.4	9910.8	7478.27	9119.8	5105.35	8034.87
Cdkn1c	83.5237	0.241842	0.527937	0.00470077	0.290368	74.7589	62.6489	84.0445	76.4579	78.1041	61.71	57.1765	94.5694	111.374	113.491	94.9962	85.2571	58.6822	116.061
Sbk1	1988.42	3.43e-06	0.00144262	0.00472646	0.290368	2228.34	1922.28	1823.37	2366.64	2364.3	2733.63	2325.18	1877.69	1361.4	1470.75	1389.94	2224.8	1910.26	1839.22
Pwwp2b	86.1023	0.320185	1.45045	0.00481408	0.2909	95.7439	76.2229	94.45	44.4523	38.3901	61.1166	58.2976	93.9172	142.149	133.179	102.853	102.85	67.9478	93.8638
Ces2c	374.243	-9.74e-06	0.00144269	0.00482689	0.2909	276.739	536.693	232.123	649.003	411.701	667.536	566.159	289.578	171.458	209.611	282.846	163.748	537.405	244.807
Arhgef26	2668.54	-0.401982	0.714989	0.0047906	0.2909	2103.74	2023.56	2623.79	3341.03	5337.55	4406.92	3531.49	1543.76	1935.86	1051.53	2535.61	2139.55	3273.85	1511.33
Lonp2	7639.32	0.171354	0.213728	0.00487014	0.291081	6671.25	8228.94	6774.79	5414.29	6354.23	6079.03	8473.33	8600.6	8410.22	8853.48	8708.22	8661.04	7815.54	7905.49
Trafd1	837.225	3.08e-05	0.00144269	0.00485089	0.291081	739.72	861.423	681.161	862.374	704.261	736.96	741.052	991.349	817.721	792.123	1076.39	876.93	908.029	931.662
Tap1	738.548	1.48e-05	0.00144269	0.00491857	0.29142	868.908	806.083	605.12	355.618	401.111	568.444	584.097	966.565	778.154	995.944	886.393	955.42	603.809	964.007
Maff	588.562	3.11e-06	0.00144269	0.00493625	0.29142	405.928	338.304	284.15	2491.11	765.155	631.934	819.529	229.575	249.126	356.687	727.828	230.059	4662.14	230.22
Ssfa2	2284.55	-5.08e-05	0.00144301	0.00493317	0.29142	2263.75	2027.74	2437.29	2592.46	3110.93	2517.06	2676.08	1946.17	1824.49	1961.78	2153.48	1962.27	2466.2	2044.07
Kat5	269.57	2.98e-05	0.00144269	0.00505591	0.295486	252.475	267.302	247.331	240.042	219.751	243.28	238.796	305.231	322.399	305.732	329.272	292.31	267.158	242.904
Sat2	192.613	1.82e-05	0.00144269	0.00503756	0.295486	162.633	184.814	179.295	145.803	162.827	128.76	174.893	183.269	293.09	200.347	268.561	272.011	165.237	175.043
Fmo2	1024.51	-2.83e-05	0.00144282	0.00506641	0.295486	1028.92	558.62	1891.4	714.793	2717.76	878.774	1363.27	526.328	701.951	738.851	804.968	853.924	906.485	657.047
Engase	186.309	2.6e-05	0.00144274	0.00515068	0.295588	192.144	191.079	184.898	138.691	127.085	143.001	143.502	198.27	227.145	262.883	207.135	240.885	168.325	183.288
Tmed3	439.023	1.24e-05	0.0014427	0.00510375	0.295588	363.302	453.161	364.993	414.295	189.303	297.276	238.796	323.493	756.172	734.219	792.825	508.836	404.598	305.057
Oas1c	49.452	1.04e-05	0.00144269	0.00523164	0.295588	41.3141	59.5165	36.8195	23.1152	25.1522	46.2825	21.301	52.1762	57.1525	67.1683	103.567	78.4906	33.9739	46.2977
Osbp2	22.8957	1.04e-05	0.00144269	0.00520773	0.295588	24.9196	15.6622	25.6136	19.559	6.61899	14.8341	10.09	34.5668	19.0508	28.9519	39.2841	27.0657	20.0755	34.2476
2410076I21Rik	18.3396	-7.64e-06	0.00144269	0.00516624	0.295588	26.2312	17.7505	41.622	10.6685	5.29519	27.2948	43.7232	13.6963	5.8618	13.8969	12.1424	13.5329	12.3541	12.6843
Dync2h1	95.5619	-1.38e-05	0.00144269	0.00518858	0.295588	80.0052	66.8255	92.8492	104.907	164.151	150.715	145.744	90.004	65.9452	81.0652	85.7108	62.2512	74.1248	73.5689
Top1	1403	-1.51e-05	0.00144269	0.00521878	0.295588	1073.51	1288.48	1505.6	1916.78	2115.43	2041.18	1668.21	1399.63	1003.83	978.573	751.398	1097.52	1615.3	1186.62
Raph1	2364.23	-1.61e-05	0.00144269	0.00514271	0.295588	2158.17	2379.62	2263.6	2523.11	3583.52	3643.86	2849.85	2375.32	1392.18	1722.06	1522.08	1743.03	2679.3	2263.51
Tbc1d8	496.281	-1.19e-05	0.00144269	0.00527353	0.295826	457.734	442.719	500.265	995.731	777.07	515.041	581.855	385.452	332.657	262.883	274.989	332.909	711.907	376.724
Utp23	151.128	-2.61e-05	0.00144269	0.00528167	0.295826	180.339	163.931	180.095	151.138	168.122	160.209	164.803	135.658	164.13	136.653	142.137	146.155	101.922	120.501
Ghr	15849.5	-0.251093	0.519151	0.00529722	0.295826	13260.5	18024.1	14919.9	20526.3	20236.9	22274.3	19521.8	11915.1	9912.3	10877.8	13532.3	14304.2	20271.6	12315.8
Dpy19l3	287.814	-7.93e-06	0.00144269	0.00535755	0.297629	186.897	122.165	226.52	487.197	522.9	613.54	512.346	175.443	112.84	268.673	169.279	106.91	349.005	175.678
Nop58	275.542	-2.3e-05	0.00144271	0.00537067	0.297629	253.131	265.214	340.18	279.16	371.987	319.824	355.391	245.228	260.85	311.522	182.136	221.939	245.539	205.486
Atrnl1	638.522	-2.36e-05	0.0014427	0.00539134	0.297635	607.252	706.889	625.931	780.582	738.679	740.52	815.045	571.33	426.446	570.931	491.409	503.423	634.694	726.176
Pigs	386.155	3.64e-05	0.00144269	0.00559281	0.298339	384.287	359.187	359.39	369.843	345.511	326.944	356.512	436.976	382.482	445.859	435.697	430.345	355.182	417.948
Fbxw9	546.67	3.49e-05	0.00144284	0.00545048	0.298339	563.971	549.222	420.223	408.961	454.063	364.92	534.768	582.417	674.107	507.236	809.253	711.829	500.343	572.062
Ap1m1	554.959	2.51e-05	0.00144269	0.00554642	0.298339	553.478	485.529	497.063	535.205	464.653	423.663	508.983	640.463	715.14	590.618	675.687	653.638	435.483	589.82
Itga7	299.617	1.88e-05	0.00144269	0.00556064	0.298339	298.38	274.611	295.356	179.587	193.275	236.753	308.305	388.061	350.243	327.735	376.413	400.573	239.361	325.986
Tmem203	294.022	1.05e-05	0.00144266	0.00558466	0.298339	297.068	231.801	240.127	286.273	244.903	220.138	219.737	231.532	435.239	314.996	430.697	401.926	298.044	263.833
Fam83f	51.0011	7.19e-06	0.00144269	0.00549116	0.298339	69.5127	48.0309	28.0148	21.3371	5.29519	21.9545	38.1177	61.3071	82.0652	105.385	44.9982	64.9578	35.5182	87.5217
Sfpq	2284.99	5.79e-06	0.00144261	0.00564643	0.298339	2208.67	2347.25	2402.87	2252.84	3125.49	3048.12	2555	2423.59	1823.02	2026.63	1479.94	1920.31	2148.08	2228
Whsc1l1	1796.23	8.7e-07	0.00144263	0.00556327	0.298339	1703.06	2034	2278.81	1685.63	1742.12	1960.48	2961.97	1915.52	1160.64	1468.44	1514.22	1496.74	1484.04	1741.55
Lingo4	9.9604	-3.85e-06	0.00144269	0.00555806	0.298339	4.59046	8.35319	12.0064	1.77809	19.857	24.328	31.391	6.52203	1.46545	4.6323	1.42851	8.11972	9.26561	5.70793
Clp1	436.34	-1.18e-05	0.00144269	0.00565162	0.298339	388.878	351.878	373.798	1057.96	603.652	533.435	413.689	281.1	395.671	318.47	406.412	378.92	325.84	279.055
P2ry1	648.799	-2.05e-05	0.00144272	0.0055817	0.298339	664.961	482.397	921.288	606.329	894.888	776.715	941.73	405.67	543.682	631.15	712.114	544.021	500.343	457.903
Cdadc1	1284.65	-3.38e-05	0.00144271	0.00564579	0.298339	1236.15	1396.03	1363.92	1479.37	1583.26	1438.91	1270.21	1126.35	1014.09	1126.81	1152.1	1358.7	1328.07	1111.14
Zbtb22	710.169	1.91e-05	0.0014427	0.00569537	0.299556	652.501	696.447	678.759	478.306	491.129	545.303	652.484	699.162	999.437	1042.27	1026.39	748.368	551.304	680.513
Fzr1	206.549	2.34e-05	0.00144268	0.005786	0.301177	192.799	200.477	189.7	177.809	184.008	145.968	202.92	255.664	200.767	220.034	266.418	227.352	189.945	237.831
Ltbr	3179.42	1.82e-05	0.00144269	0.00580949	0.301177	3153.65	3062.49	2601.38	2631.57	2558.9	2220.97	2642.45	3011.22	4169.21	3587.71	5256.22	4200.6	2456.93	2958.61
Pxdn	256.608	1.57e-05	0.00144269	0.00579353	0.301177	275.428	231.801	241.728	202.702	128.408	221.919	181.619	277.838	350.243	327.735	339.986	173.221	298.044	341.842
Zfp189	273.883	-2.08e-05	0.00144271	0.00579952	0.301177	269.526	231.801	284.951	435.632	389.197	329.318	266.824	219.14	208.094	286.044	206.42	196.227	284.145	227.049
Slc17a9	132.676	1.42e-05	0.00144269	0.00592481	0.30497	158.699	122.165	119.263	108.464	63.5423	95.5318	89.6886	181.312	159.734	204.979	146.423	138.035	103.466	166.164
Dmd	1155.56	-1.55e-05	0.00144269	0.00591404	0.30497	861.695	1214.35	1237.46	1196.66	1629.6	1784.25	1558.34	1108.09	874.874	684.422	684.258	1104.28	1193.72	1045.82
Fam73b	2596.05	2.05e-05	0.00144269	0.00596589	0.305995	2795.59	2492.38	2667.01	1570.05	1959.22	2066.69	2228.76	3047.74	3086.24	3231.03	2902.74	3163.98	2140.36	2992.86
Onecut2	6233.65	-1.72e-05	0.00144269	0.00601261	0.307302	6140.07	6028.92	8246.77	5222.25	8271.09	7544.64	8964.37	6779	4192.65	5622.45	3874.13	5030.17	4699.21	6655.45
Thoc2	1074.01	-1.76e-05	0.00144269	0.00606087	0.307595	807.921	1187.2	1145.41	1235.77	1427.05	1653.71	1207.43	946.347	910.044	808.336	687.115	943.241	1253.95	822.577
Ginm1	1225.41	-0.00010931	0.00144473	0.00605021	0.307595	1175.81	1248.8	1135.8	1954.12	1577.97	1544.53	1354.3	823.08	874.874	1045.74	864.251	1098.87	1612.22	845.409
Zfpm1	1339.97	1.78e-05	0.00144269	0.00615029	0.308082	1224.34	1290.57	1287.08	1194.88	1053.74	903.102	1069.54	1864	1336.49	2122.75	1340.66	1443.96	1031.57	1596.95
Pik3r1	3443.57	-3.41e-06	0.00144267	0.00617183	0.308082	2668.37	3417.5	3273.73	4850.63	4304.99	4663.26	5754.64	3359.5	1811.3	2114.64	1829.93	3008.36	3826.7	3326.46
Mbnl2	2242.41	-1.09e-05	0.00144269	0.0061251	0.308082	1830.28	2174.96	2408.48	4253.19	2688.63	3248.08	2668.24	1756.38	1272.01	1499.71	1034.24	1397.95	3297.01	1864.59
Plcl1	22.2693	-1.15e-05	0.00144269	0.00617697	0.308082	35.4121	21.9271	27.2144	26.6714	29.1236	27.2948	23.5433	20.8705	11.7236	9.26459	14.2851	14.8862	32.4296	17.1238
Acadsb	3130.45	-2.5e-05	0.00144272	0.0061746	0.308082	2256.54	3272.36	3340.97	4242.52	3917.12	4034.29	3560.64	2503.81	2580.66	2639.25	2862.74	3035.42	3057.65	2522.27
Fadd	395.914	2.24e-05	0.00144269	0.00621961	0.309143	389.533	393.644	405.014	291.607	301.826	302.023	354.27	379.582	482.133	510.711	488.552	483.123	342.827	417.948
Mpp4	22.703	-9.37e-06	0.00144269	0.00627142	0.30959	17.7061	27.1479	34.4182	24.8933	14.5618	46.8758	35.8754	19.5661	8.7927	17.3711	12.8566	21.6526	24.7083	11.4159
Rpf2	70.8467	-1.84e-05	0.00144269	0.00625214	0.30959	70.8242	76.2229	96.0509	69.3455	79.4279	85.4446	86.3253	46.9586	63.0143	60.2199	60.7118	74.4308	77.2134	45.6635
Wdr82	1308.11	-4.65e-06	0.00144254	0.00638519	0.310538	1304.35	1160.05	1343.91	1445.59	1742.12	1588.44	1415.96	1199.4	1065.38	1140.7	1127.81	1268.03	1244.68	1267.16
Sftpa1	69.7235	-6.69e-06	0.00144269	0.00639798	0.310538	76.0705	42.8101	44.8237	128.023	112.523	127.574	134.533	52.8284	14.6545	22.0034	22.8562	28.419	118.909	50.103
Ncam2	104.088	-1.07e-05	0.00144269	0.00639144	0.310538	92.465	114.856	107.257	88.9045	149.589	180.976	172.651	71.0901	41.0326	67.1683	63.5689	60.8979	163.692	83.0822
Tra2a	412.011	-1.22e-05	0.00144269	0.00632605	0.310538	378.385	410.351	434.63	490.753	684.404	704.918	389.024	343.059	219.817	303.415	253.561	253.065	594.543	308.228
Gdap2	510.476	-1.33e-05	0.00144267	0.00639473	0.310538	495.114	426.013	496.263	737.908	750.594	574.971	644.637	380.887	381.017	442.384	336.415	439.818	620.796	419.85
Asap3	228.619	1.04e-05	0.00144269	0.0064722	0.312292	218.375	216.139	222.518	117.354	142.97	134.101	156.955	314.362	279.901	273.306	486.409	297.723	95.7446	244.807
Sertad4	12.1216	-5.22e-06	0.00144269	0.00647729	0.312292	4.59046	10.4415	8.80466	14.2247	37.0664	27.2948	22.4221	5.21762	2.9309	20.8453	5.71406	1.35329	3.08854	5.70793
Tbc1d10a	432.142	1.66e-05	0.00144269	0.00659626	0.315311	415.109	394.688	392.208	344.95	317.712	377.974	287.003	401.757	633.074	598.724	709.257	450.645	376.801	350.087
Adamts9	61.8812	-5.15e-06	0.00144269	0.0066053	0.315311	45.9046	29.2362	42.4225	293.385	97.9611	80.6977	40.3599	39.1322	8.7927	17.3711	28.5703	13.5329	86.479	42.4924
Kpna4	1511.11	-1.63e-05	0.00144262	0.00656753	0.315311	1345.66	1678.99	1728.92	1511.38	1743.44	2060.16	1624.48	1386.58	1342.35	1167.34	1147.81	1366.82	1660.09	1391.47
Pold1	40.6535	1.28e-05	0.00144269	0.00664896	0.315313	37.3795	44.8984	27.2144	19.559	29.1236	27.8882	42.6021	69.1335	46.8944	37.0584	50.7122	50.0716	33.9739	52.6398
Snora7a	4.39146	-5.78e-06	0.00144269	0.00663164	0.315313	5.90202	6.26489	3.2017	10.6685	6.61899	3.56019	10.09	0.652203	1.46545	1.15807	4.28554	1.35329	3.08854	3.17107
Fam13a	682.037	1.6e-05	0.00144268	0.00673194	0.316139	722.014	779.979	607.522	492.531	467.301	465.792	552.706	941.129	800.136	759.697	614.975	736.188	657.858	950.688
Socs2	598.328	-5.57e-06	0.0014427	0.00669787	0.316139	1125.32	353.967	1437.56	464.082	992.849	456.891	1251.16	99.7871	301.883	372.9	1004.96	175.927	213.109	126.209
Pde12	515.36	-3.37e-05	0.00144269	0.00671774	0.316139	557.413	492.838	602.719	501.422	601.004	579.124	560.554	448.716	487.995	535.03	408.555	475.004	461.736	502.932
Scyl1	955.668	3.1e-05	0.00144267	0.00675874	0.31637	938.421	916.763	869.26	924.607	795.603	786.802	913.703	1008.96	1071.24	1064.27	1214.24	1019.02	980.61	875.851
Lrrc15	52.7588	-1.04e-05	0.00144269	0.00681383	0.316817	67.5453	42.8101	57.6305	56.8989	120.466	42.1289	72.872	21.5227	54.2216	55.5876	35.7128	46.0118	27.7968	37.4187
Ahctf1	1676.63	-1.89e-05	0.00144271	0.006834	0.316817	1499.11	1372.01	1721.71	2080.37	2773.36	2408.47	1808.35	1423.11	1030.21	1460.33	1227.09	1418.24	1953.5	1296.97
Zfp317	524.585	-2.3e-05	0.00144267	0.00681444	0.316817	480.687	504.324	628.333	510.312	659.252	656.855	615.488	408.279	548.078	524.608	451.41	456.058	489.533	410.971
Avil	5.01611	-4.61e-06	0.00144269	0.00696992	0.321061	2.62312	1.04415	7.20381	8.89045	7.94279	16.0209	8.96886	2.60881	1.46545	5.79037	1.42851	4.05986	1.54427	0.634215
Crip3	28.3992	-7.65e-06	0.00144269	0.00699154	0.321061	22.2965	21.9271	48.0254	14.2247	22.5046	71.7972	62.782	19.5661	13.189	20.8453	19.9992	27.0657	9.26561	24.1002
Gna12	3694.97	-3.54e-05	0.00144286	0.00699213	0.321061	3659.25	3802.79	3974.9	2311.52	2261.05	2716.43	3061.74	4114.1	4422.73	5089.74	4776.95	4444.19	2673.13	4421.11
Snx10	2888.6	-8.95e-06	0.00144269	0.00706971	0.323569	2341.13	2068.46	2581.37	3995.37	6649.44	5664.26	2522.49	1329.84	2271.45	1595.83	1736.36	2098.95	4121.65	1463.77
Hspd1	3885.98	-2.41e-05	0.00144273	0.00709148	0.323569	3280.21	3809.06	3886.06	5293.38	5649.97	4969.43	4161.55	3654.29	2643.67	3342.2	2582.04	3387.28	4347.11	3397.49
BC029722	421.5	1.85e-05	0.00144269	0.0071962	0.323586	419.043	399.909	440.233	302.275	358.749	332.284	276.914	436.324	587.645	407.642	614.975	544.021	381.434	399.555
Ptprd	5321.89	-1.4e-05	0.0014427	0.0071373	0.323586	4093.38	4782.2	4752.92	7775.59	9302.33	8394.34	6290.53	4594.77	2538.16	2929.93	3401.29	4507.8	6888.98	4254.31
Tmx1	1002.81	-1.83e-05	0.00144268	0.00713813	0.323586	773.165	1083.83	1203.04	1203.77	1190.09	1447.22	1066.17	829.602	1002.37	743.484	674.973	852.571	1110.33	858.727
Morc3	577.635	-1.83e-05	0.00144267	0.00719158	0.323586	581.021	557.576	581.108	572.545	787.66	875.807	597.55	515.24	430.842	467.862	485.695	496.656	657.858	479.466
4833422C13Rik	57.0587	-1.86e-05	0.0014427	0.00720372	0.323586	59.0202	85.6202	62.4331	56.8989	68.8375	67.0503	57.1765	39.7844	51.2907	42.8487	53.5693	40.5986	64.8592	48.8345
Mctp1	4.882	-5.56e-06	0.00144269	0.00728382	0.324164	5.24624	9.39734	7.20381	8.89045	2.6476	8.30711	6.72664	2.60881	2.9309	1.15807	1.42851	0	9.26561	2.53686
Zc3h13	674.569	-1.83e-05	0.00144272	0.00727875	0.324164	673.486	658.858	724.384	627.666	1000.79	897.168	1123.35	889.605	351.708	437.752	343.558	477.71	500.343	737.592
Pdp2	1152.67	-2.39e-05	0.00144274	0.00724549	0.324164	983.014	1026.4	1159.81	1475.82	1303.94	1564.11	1757.9	1003.09	827.979	953.095	859.965	783.553	1300.27	1138.42
Gpr19	83.992	1.71e-05	0.00144269	0.00733573	0.324281	64.9222	77.267	84.8449	44.4523	58.2471	86.6313	80.7197	100.439	89.3924	85.6975	125.709	101.497	80.3019	95.7665
Nme6	161.88	1.3e-05	0.00144269	0.00735373	0.324281	161.978	133.651	127.267	174.253	90.0183	112.739	114.353	140.224	253.523	204.979	297.131	179.987	129.718	146.504
4930451G09Rik	14.9087	1.01e-05	0.0014427	0.00733576	0.324281	11.1483	15.6622	12.0064	10.6685	1.3238	11.2739	11.2111	23.4793	32.2399	13.8969	18.5707	20.2993	12.3541	14.5869
Amt	655.363	4.69e-05	0.00144293	0.00772216	0.325637	612.498	626.489	659.549	503.2	507.015	581.498	662.574	750.686	801.601	682.106	720.685	749.721	562.113	755.35
Mogs	1484.06	1.76e-05	0.00144269	0.00750781	0.325637	1304.35	1322.94	1327.1	1386.91	1209.95	1164.78	1159.23	1268.53	1503.55	2612.62	2074.92	1653.72	1507.21	1281.11
Capn5	67.5321	1.05e-05	0.00144268	0.00755727	0.325637	74.7589	46.9867	76.8407	42.6742	34.4188	47.4692	53.8132	101.744	68.8761	79.9071	79.9968	82.5505	46.328	109.085
Fam110a	83.2024	8.5e-06	0.00144269	0.00761015	0.325637	102.302	68.9138	74.4394	49.7865	23.8284	45.0958	61.6609	150.659	71.807	108.859	89.2821	113.676	47.8723	156.651
Bhlha15	13.4412	5.35e-06	0.00144269	0.00747776	0.325637	7.21358	16.7064	12.8068	7.11236	2.6476	2.96683	3.36332	15.0007	16.1199	50.9553	12.8566	18.946	3.08854	18.3922
Lepr	331.356	-4.46e-06	0.00144269	0.00763725	0.325637	186.897	96.0617	180.095	1479.37	998.144	342.965	155.834	118.701	186.112	218.876	96.4247	182.694	233.184	163.627
Cd14	131.544	-7.95e-06	0.00144269	0.00742951	0.325637	318.053	149.313	90.4479	279.16	141.646	105.026	119.958	102.396	58.618	75.2748	59.9976	40.5986	159.06	142.064
Fmo5	34465.7	-1.36e-05	0.00144269	0.0074194	0.325637	32668.3	37213.5	34316.6	46168.1	59161.9	39511.6	37051.5	30598.1	17865.3	22353.1	20679.9	28657.2	45657.8	30616.7
Cmah	8010.47	-1.54e-05	0.00144269	0.0076081	0.325637	6475.83	8948.36	8235.56	8339.25	10546.7	11996.1	10704.3	7379.68	4994.25	6182.96	4477.68	6683.88	9316.57	7865.53
Eif3m	64.5419	-1.85e-05	0.00144269	0.00763658	0.325637	62.9549	60.5606	66.4352	80.0141	92.6659	71.7972	79.5986	52.1762	54.2216	64.8522	46.4267	56.838	61.7707	53.2741
Impa1	1509.24	-3.03e-05	0.00144274	0.00771108	0.325637	1440.09	1445.1	1478.38	1856.33	1803.01	2105.85	1549.37	1324.62	1173.83	1286.62	1331.37	1587.41	1508.75	1238.62
Ahsa2	239.501	-3.49e-05	0.00144282	0.00766636	0.325637	207.882	266.258	260.938	280.938	293.883	296.683	285.882	258.925	142.149	208.453	217.848	209.759	186.856	236.562
Pfkfb1	413.676	-3.52e-05	0.00144284	0.00768519	0.325637	346.908	442.719	374.598	494.309	538.786	571.411	517.952	297.405	452.824	306.89	356.414	391.1	404.598	295.544
Rb1cc1	2036.73	-3.67e-05	0.00144286	0.00765764	0.325637	1698.47	2243.88	2109.92	2389.75	2776	2936.56	2038.17	1478.54	1695.53	1793.86	1566.37	1822.88	2452.3	1511.97
Dbt	2355.44	-6.72e-05	0.00144342	0.00771066	0.325637	1727.32	2309.66	2505.33	3065.43	3613.97	3071.26	2561.73	1763.56	1900.69	1994.2	1891.35	2177.44	2632.98	1761.21
Kcnab1	45.8178	-1.11e-05	0.00144269	0.00776984	0.326695	36.0679	36.5452	56.0297	35.5618	68.8375	76.5441	81.8408	31.9579	23.4472	38.2164	28.5703	47.365	38.6067	41.8582
Sms	82.0246	-1.93e-05	0.00144269	0.00780741	0.326994	65.578	105.459	90.4479	104.907	105.904	92.565	87.4464	70.4379	68.8761	63.6941	74.2827	64.9578	83.3905	70.3979
Ythdf2	812.24	-2.65e-05	0.00144269	0.00782217	0.326994	802.019	768.494	885.269	990.397	1000.79	908.442	904.734	836.776	647.729	722.638	571.406	809.266	699.553	823.845
Pcnxl2	5.01075	4.12e-06	0.00144269	0.00791139	0.328823	3.2789	4.1766	0.800424	5.33427	0	1.18673	1.12111	4.56542	8.7927	19.6873	0.714257	2.70657	10.8099	6.97636
Nrp1	2926.83	-2.23e-05	0.00144269	0.00791098	0.328823	3263.16	3225.38	3273.73	3499.28	3841.66	2738.97	3023.63	1890.08	2900.13	3014.47	2834.17	2840.55	2612.9	2017.44
Kremen1	667.224	1.82e-05	0.00144268	0.00803909	0.332061	721.358	707.933	685.963	467.638	443.472	449.771	591.945	760.469	740.052	804.862	819.967	764.607	609.986	773.108
Saa2	5237.29	-4.05e-06	0.00144269	0.0080487	0.332061	12814.6	3673.32	1378.33	10826.8	13232.7	11196.2	2320.69	2230.53	1305.72	345.106	6780.44	3578.09	1539.63	2099.89
Rapgef4	3520.79	-6.14e-06	0.00144269	0.00805818	0.332061	2223.09	2548.77	3089.64	8636.19	6086.82	6207.79	3424.98	1192.88	3054	2259.4	3243.44	1841.82	4374.91	1107.34
Rpa2	72.9307	1.15e-05	0.00144269	0.00808732	0.332315	64.2664	95.0176	72.8386	40.8961	42.3615	36.7886	49.3287	91.3084	105.512	57.9037	105.71	106.91	60.2264	91.9612
Arfgap1	602.017	3.02e-05	0.00144275	0.00825743	0.334512	541.674	566.973	555.494	561.877	517.605	460.451	556.069	605.897	738.587	853.501	757.112	598.153	585.277	529.569
Lrrc61	281.693	1.64e-05	0.00144269	0.00834893	0.334512	259.033	254.772	236.925	184.921	215.779	213.018	317.273	317.623	272.574	302.257	488.552	338.322	257.893	284.763
Bcl7c	98.4717	1.35e-05	0.00144271	0.00833442	0.334512	90.4976	83.5319	67.2356	101.351	67.5137	61.1166	58.2976	85.4386	164.13	118.124	214.277	120.443	89.5675	57.0793
Ankrd37	25.0977	-6.94e-06	0.00144269	0.00831664	0.334512	28.1985	14.6181	28.0148	485.419	74.1327	24.9213	35.8754	5.86983	19.0508	11.5807	25.7132	16.2394	304.221	12.6843
Gdap10	128.7	-9.98e-06	0.00144269	0.0082796	0.334512	154.108	134.695	198.505	88.9045	113.847	145.374	282.519	113.483	73.2725	61.3779	96.4247	71.7242	180.679	86.8874
Papss2	3381.4	-1.1e-05	0.00144269	0.00819885	0.334512	2556.23	2602.02	3313.75	4560.8	6105.36	4830.59	4953.05	2930.35	1484.5	2079.9	1977.06	2852.73	4357.92	2735.37
Rictor	869.687	-1.58e-05	0.0014427	0.00829359	0.334512	680.7	794.597	760.403	1283.78	1376.75	1127.39	1104.29	779.383	589.111	613.779	605.69	633.338	1025.39	801.013
Parp4	792.122	-1.67e-05	0.00144269	0.00826316	0.334512	678.076	908.41	697.97	993.953	963.725	1397.97	769.08	750.033	599.369	566.298	504.98	756.487	761.324	742.031
Syt1	406.845	-1.7e-05	0.0014427	0.0082489	0.334512	288.543	429.145	397.811	538.762	549.376	595.145	524.678	284.361	341.45	272.147	314.273	364.034	515.785	280.323
Camk2g	284.909	1.92e-05	0.00144268	0.00839479	0.334705	251.82	294.45	257.736	183.143	201.217	254.554	298.215	371.104	350.243	303.415	368.557	296.37	233.184	324.718
Lrrc16a	480.19	-8.18e-06	0.00144269	0.00840003	0.334705	325.923	318.465	315.367	702.346	1015.35	774.935	853.163	290.23	259.385	277.938	269.989	330.202	724.262	265.102
Plcxd1	74.3319	1.45e-05	0.0014427	0.00848804	0.33482	56.3971	66.8255	52.0276	42.6742	42.3615	67.0503	89.6886	116.092	68.8761	74.1167	87.1393	101.497	50.9608	124.94
Tsen2	115.038	1.44e-05	0.0014427	0.00856494	0.33482	100.334	139.916	115.261	60.4551	55.5995	66.4569	108.747	151.963	153.872	130.862	126.423	159.688	84.9347	156.017
Mob3a	108.896	1.3e-05	0.00144268	0.00853581	0.33482	125.254	95.0176	100.053	103.129	56.9233	72.3906	81.8408	123.266	109.909	120.44	130.709	90.6702	176.047	138.893
Wdr78	15.5012	-8.89e-06	0.00144269	0.0085567	0.33482	13.7714	21.9271	16.0085	33.7837	14.5618	28.4815	12.3322	12.3919	5.8618	9.26459	13.5709	8.11972	12.3541	14.5869
Akr1c19	697.919	-1.06e-05	0.00144269	0.00843274	0.33482	672.83	526.251	795.621	645.447	1532.96	964.812	857.647	405.018	414.722	485.233	727.828	426.285	917.295	398.921
Riok2	1036.46	-1.46e-05	0.00144268	0.0085512	0.33482	907.599	916.763	1097.38	1282	1401.9	1464.43	1273.58	762.425	804.532	839.604	846.394	828.212	1375.94	709.687
Zc3h12a	142.974	-2.03e-05	0.00144271	0.00854011	0.33482	165.912	112.768	140.074	250.711	184.008	172.076	128.927	143.485	123.098	114.649	107.139	115.029	121.997	121.769
Zbtb4	730.441	1.45e-05	0.0014426	0.00862354	0.335673	681.355	729.86	730.787	613.441	517.605	684.15	668.18	872.648	763.499	939.198	770.683	725.362	676.389	853.019
Gm2061	45.3835	-9.29e-06	0.00144269	0.0086564	0.335673	34.7563	24.0154	56.8301	87.1264	63.5423	78.3242	54.9343	37.8278	46.8944	41.6907	39.2841	29.7723	20.0755	20.2949
Herc4	812.733	-1.63e-05	0.00144261	0.00865488	0.335673	733.818	899.012	802.025	883.711	1002.12	894.795	1021.33	762.425	679.969	683.264	600.69	768.667	841.626	804.819
Chmp6	335.418	2.24e-05	0.00144268	0.00872236	0.335727	372.483	335.172	319.369	284.495	270.055	268.201	236.554	323.493	417.653	363.635	426.411	389.747	350.549	338.037
Fen1	98.9467	1.23e-05	0.00144269	0.00870635	0.335727	95.7439	111.724	94.45	56.8989	41.0377	58.1498	91.9308	151.963	77.6688	159.814	114.281	123.149	91.1118	117.33
Adcy1	42.6164	-3.15e-06	0.00144269	0.00872742	0.335727	24.2639	11.4856	7.20381	261.379	125.761	20.1744	25.7855	11.0875	16.1199	18.5292	11.4281	9.47301	46.328	7.61058
Zkscan17	712.157	3.13e-05	0.00144273	0.00877676	0.336278	713.489	675.564	660.35	665.006	567.909	531.062	701.813	804.166	643.333	836.13	786.397	885.05	664.035	835.895
Itpr1	1465.87	-1.1e-05	0.00144269	0.00878824	0.336278	1333.86	1181.98	1662.48	1683.85	2504.63	1845.37	2294.91	1720.51	738.587	924.143	589.262	1028.5	1471.69	1542.41
Ppp6c	751.851	-2.78e-05	0.00144268	0.00889381	0.33942	720.046	739.258	793.22	874.821	921.364	853.852	829.619	584.374	706.347	698.319	651.402	646.871	860.157	646.265
Rrp36	467.697	1.56e-05	0.00144268	0.00896335	0.340576	476.752	436.454	421.823	332.503	459.358	340.592	330.727	555.677	691.692	501.446	659.259	542.668	332.018	466.782
Lekr1	10.561	-7.19e-06	0.00144269	0.0089886	0.340576	17.7061	14.6181	16.8089	10.6685	18.5332	13.054	4.48443	5.86983	14.6545	10.4227	4.28554	6.76643	6.17707	3.80529
Lin7c	2317.2	-1.91e-05	0.0014427	0.00899475	0.340576	1763.39	2332.63	2466.11	3022.75	3227.42	3355.48	2313.97	1714.64	1969.56	1874.92	1762.79	2104.36	2677.76	1855.08
Fam3a	363.744	2.76e-05	0.00144267	0.00906968	0.341398	367.237	351.878	329.775	330.725	316.388	332.284	288.125	382.191	445.497	415.749	417.126	438.465	310.398	366.576
Pqlc2	238.736	1.3e-05	0.00144267	0.00908728	0.341398	257.066	215.095	207.31	197.368	193.275	151.308	200.678	282.404	338.519	291.835	283.56	309.903	148.25	265.736
Tgfbr1	1535.2	-2.72e-05	0.00144268	0.0090809	0.341398	1340.41	1582.93	1658.48	1735.42	1850.67	1886.9	1657	1220.92	1503.55	1459.17	1262.81	1369.53	1647.73	1317.26
Eif4e	926.281	-2.62e-05	0.00144268	0.00917778	0.343905	880.057	997.162	988.523	1187.76	1088.16	1054.41	902.491	735.685	849.961	900.982	687.829	902.642	997.597	794.671
Gm15417	185.407	1.67e-05	0.00144269	0.00920529	0.344045	162.633	148.269	171.291	183.143	156.208	139.441	145.744	147.398	268.177	207.295	279.274	221.939	217.742	147.138
Sigmar1	2095.6	1.98e-05	0.00144268	0.00926674	0.345449	2051.94	1875.29	1899.41	2091.03	1914.21	1428.23	1616.64	2040.74	2617.29	2510.7	3018.45	2449.45	1669.35	2155.7
Adamts7	127.276	8.86e-06	0.00144269	0.00929143	0.345479	158.043	131.563	104.856	51.5646	35.7426	93.7517	71.7509	211.314	130.425	165.605	232.848	143.448	66.4035	184.557
Fancg	52.2311	1.41e-05	0.00144269	0.00936099	0.34592	53.774	59.5165	46.4246	23.1152	34.4188	44.5024	39.2388	73.0467	55.6871	50.9553	67.1401	62.2512	46.328	74.8374
Rbm12b2	332.646	-1.42e-05	0.00144269	0.00938313	0.34592	383.631	384.247	436.231	206.259	458.034	555.39	298.215	270.664	342.915	250.144	222.848	339.675	231.64	277.152
Tmem57	1091	-1.96e-05	0.00144268	0.00936964	0.34592	1003.34	1029.53	1135.8	1337.12	1384.69	1284.64	1402.51	1095.7	797.205	773.594	788.54	1009.55	1257.03	974.788
Pbx2	425.292	-9.95e-05	0.00144423	0.00939895	0.34592	388.222	445.852	409.817	385.846	394.492	354.832	357.633	443.498	464.548	489.865	474.267	521.015	378.346	445.853
Sema6b	513.455	-8.92e-06	0.00144269	0.00945114	0.34657	440.028	302.803	437.832	1166.43	1040.51	662.789	500.014	208.705	568.595	264.041	393.556	491.243	441.661	270.176
Ranbp6	833.309	-1.75e-05	0.00144262	0.00946455	0.34657	778.411	879.173	962.109	867.708	1023.3	1075.18	811.682	660.029	827.979	786.332	622.118	878.283	730.439	763.595
Oasl1	379.36	1e-05	0.00144269	0.00949036	0.346638	367.893	399.909	368.995	192.034	112.523	290.749	303.82	592.2	378.086	585.986	417.84	473.65	236.273	591.088
Acd	182.335	2.29e-05	0.00144269	0.0095463	0.347803	171.814	163.931	175.293	163.584	152.237	162.582	142.381	163.703	225.679	230.457	246.419	207.053	177.591	169.97
Arhgap5	4983.37	-1.42e-05	0.00144268	0.00960498	0.348187	4372.74	5260.42	5727.83	5042.67	7389.44	6855.74	5783.79	3004.05	4419.8	4428.48	3101.3	4315.63	6538.43	3526.87
Kcnn2	495.096	-2.8e-05	0.00144265	0.00958959	0.348187	475.44	492.838	485.057	560.099	628.804	539.962	569.523	479.369	473.34	460.914	427.126	504.776	423.129	410.971
Tysnd1	2492.07	6.02e-06	0.00144263	0.00966327	0.349424	2463.11	2118.58	2154.74	2117.71	2381.51	1895.21	2093.11	1952.04	3355.88	3286.61	3526.29	2874.38	2549.59	2120.18
Nrn1	7484.82	-2.28e-05	0.00144264	0.00971088	0.35027	7182.1	8311.43	7850.56	9206.95	8995.21	8491.65	7180.69	5931.79	6398.15	6631.13	7489.7	6701.48	8462.59	5954.01
Atp5o	163.646	-1.63e-05	0.00144269	0.00978585	0.350353	167.224	151.402	182.497	215.149	248.874	184.537	161.439	93.9172	180.25	167.921	142.137	151.568	120.453	123.672
Lcorl	592.479	-1.67e-05	0.00144267	0.0097655	0.350353	497.081	664.079	701.171	540.54	782.365	716.192	778.049	422.628	486.529	457.439	487.837	527.782	731.983	501.03
R3hdm1	561.323	-2.08e-05	0.00144266	0.00974563	0.350353	528.559	576.37	569.902	663.228	632.776	700.171	669.301	598.07	388.344	485.233	437.125	488.537	548.215	572.696
Thap3	264.711	0.000199934	0.0014497	0.00984039	0.35057	255.098	296.538	235.325	174.253	206.513	209.458	152.471	234.793	386.879	338.158	395.698	382.98	206.932	230.854
Ift46	200.829	2.39e-05	0.00144267	0.00981796	0.35057	175.093	205.697	152.881	199.146	170.77	168.516	200.678	199.574	243.265	216.56	220.705	253.065	186.856	218.804
Slc35c2	483.121	2.94e-05	0.00144277	0.00989978	0.351188	520.689	530.428	424.225	371.621	342.864	360.173	408.083	558.286	473.34	607.989	645.688	584.62	395.333	540.351
Rab11fip4	93.2657	1.45e-05	0.00144272	0.00990629	0.351188	100.334	78.3112	116.061	44.4523	59.5709	42.1289	39.2388	125.223	155.338	165.605	74.997	108.263	50.9608	145.235
Ryr3	10.834	-8.13e-06	0.00144269	0.00994533	0.35171	7.86936	17.7505	16.8089	14.2247	18.5332	15.4275	7.84775	8.47864	5.8618	8.10652	6.42831	10.8263	4.6328	8.87901
Lgr5	220.179	7.76e-07	0.00144267	0.0100107	0.353156	176.405	297.582	193.703	110.242	166.799	149.528	104.263	361.32	224.214	222.35	189.278	376.214	163.692	346.916
Sod2	5677.79	-2.94e-05	0.00144264	0.0100449	0.353502	5684.96	5503.71	6233.7	5506.75	6979.06	6735.88	6080.89	5042.83	5495.44	4862.75	4811.95	6072.2	5182.56	5296.33
Rad9a	57.9922	1.32e-05	0.00144269	0.0100914	0.354277	61.6433	50.1192	56.0297	46.2304	30.4474	43.3157	40.3599	65.2203	109.909	62.536	72.1399	69.0176	37.0624	67.861
Egfr	8059.26	4.97e-05	0.00144311	0.0105463	0.355187	4714.4	7310.09	8802.26	11776.3	14406.9	15572.9	10153.9	2036.83	6720.55	8845.37	7146.85	5319.77	7994.67	2028.85
Stbd1	3090.1	3.48e-05	0.0014428	0.0109868	0.355187	2524.75	3004.02	2347.64	2875.17	2999.73	3049.3	2593.12	2988.39	3143.39	2897.5	4394.11	3491.48	3968.77	2983.98
Abca1	7321.01	2.5e-05	0.00144277	0.0101563	0.355187	6447.63	6962.39	7090.15	12064.3	11256.3	9298.63	8020.4	5913.52	4082.74	6157.48	3462.72	5742	9918.83	6077.05
Gas1	843.064	2.43e-05	0.00144276	0.0110329	0.355187	983.67	734.037	786.817	362.731	680.432	571.411	708.54	822.428	1140.12	1335.26	1022.1	1167.89	608.441	879.022
Polm	113.284	2.36e-05	0.00144274	0.0103004	0.355187	106.892	124.254	94.45	72.9017	97.9611	90.1915	90.8097	171.529	142.149	125.072	138.566	120.443	75.6691	135.088
Trip6	293.484	2.15e-05	0.00144268	0.0105658	0.355187	291.166	297.582	224.919	288.051	239.607	207.084	287.003	285.665	316.537	352.055	397.841	316.669	277.968	326.621
Vav2	597.216	2.15e-05	0.00144267	0.0104746	0.355187	594.137	572.194	598.717	412.517	536.138	467.572	566.159	761.121	594.973	662.418	690.686	687.47	503.431	713.492
Hapln4	209.833	1.73e-05	0.0014427	0.0103969	0.355187	207.882	190.035	208.11	181.365	107.228	138.254	201.799	269.36	202.232	350.896	228.562	246.298	176.047	229.586
Sppl2b	351.433	1.65e-05	0.00144268	0.0108965	0.355187	346.908	273.567	304.961	318.278	277.998	326.944	292.609	399.8	392.741	463.23	523.55	415.459	240.906	343.11
Chrd	141.051	1.63e-05	0.00144268	0.0103863	0.355187	112.794	120.077	119.263	117.354	135.027	137.661	105.384	170.877	140.683	158.656	219.991	202.993	109.643	124.306
Cdkn2d	89.1233	1.41e-05	0.00144267	0.0110385	0.355187	80.0052	82.4878	73.639	78.236	84.7231	67.0503	68.3876	90.004	149.476	100.752	123.566	93.3768	71.0363	84.9848
Cyp17a1	1067.1	1.37e-05	0.00144269	0.0104095	0.355187	685.29	607.695	811.63	1246.44	1134.5	1037.8	619.972	1199.4	1414.16	1247.25	1518.51	1387.12	707.275	1322.34
Rassf7	461.407	1.32e-05	0.00144268	0.0106178	0.355187	451.177	390.512	408.216	364.509	398.463	351.272	365.481	418.062	691.692	538.505	773.54	576.5	372.169	359.6
4632434I11Rik	36.5818	1.07e-05	0.00144269	0.0105733	0.355187	28.1985	36.5452	25.6136	14.2247	17.2094	37.9754	38.1177	50.8718	27.8435	44.0068	29.2845	54.1315	47.8723	60.2504
Sertad3	146.471	1.06e-05	0.0014427	0.0108133	0.355187	124.598	163.931	129.669	76.4579	100.609	77.7308	48.2076	101.744	381.017	200.347	215.706	242.238	60.2264	128.111
Apold1	82.6842	2.43e-06	0.00144269	0.0107826	0.355187	53.1182	34.4569	52.828	369.843	150.913	49.8427	86.3253	30.6535	58.618	78.749	51.4265	37.892	799.931	38.0529
Rbm12b1	384.021	2.52e-07	0.00144266	0.0103998	0.355187	520.033	427.057	481.055	229.374	594.385	585.058	326.242	367.19	319.468	245.512	252.133	416.812	298.044	313.936
Hsd3b7	13460.3	8.8e-08	0.00144265	0.0103907	0.355187	11569.3	13179.2	11544.5	11554	9187.16	11612.2	11224.5	10407.9	19962.4	16506	21707	16523.6	13296.1	10170.9
Lmod2	80.7518	-4.13e-06	0.00144269	0.0107285	0.355187	27.5428	40.7218	56.0297	140.469	203.865	250.993	115.474	22.8271	27.8435	13.8969	30.713	55.4848	128.174	16.4896
Mdm1	71.0111	-5.45e-06	0.00144269	0.0108625	0.355187	20.985	40.7218	44.8237	325.391	47.6567	155.462	69.5087	56.7417	41.0326	19.6873	23.5705	33.8322	84.9347	29.8081
Ppp1r3b	11618.1	-8.01e-06	0.00144269	0.0106763	0.355187	7319.82	7141.98	10024.5	16787	23469.6	20777.3	18408.6	7850.57	5356.22	4166.75	6286.89	11080.7	16086.6	7897.24
Lonrf3	407.414	-8.11e-06	0.00144269	0.0108369	0.355187	302.315	164.976	380.201	688.121	816.784	595.739	684.997	268.708	237.403	192.24	212.134	282.837	572.923	304.423
Hivep2	452.296	-1.06e-05	0.00144269	0.0110505	0.355187	398.714	370.673	385.804	618.776	804.869	562.51	704.055	450.02	186.112	333.525	259.275	292.31	572.923	392.579
Fam108b	921.95	-1.08e-05	0.00144268	0.0106096	0.355187	643.32	740.302	1170.22	1438.48	1204.66	1216.99	1236.58	492.413	948.146	706.425	910.678	659.051	1002.23	537.814
Per2	1201.33	-1.16e-05	0.00144269	0.0104483	0.355187	1119.42	987.765	1294.29	1353.13	1904.95	1638.28	1728.75	1232.66	597.904	565.14	822.11	1115.11	1403.74	1055.33
4921524J17Rik	194.783	-1.28e-05	0.00144269	0.0108974	0.355187	146.239	195.256	203.308	364.509	308.445	223.105	169.287	129.788	140.683	127.388	167.85	181.34	213.109	156.651
D5Ertd579e	2109.25	-1.49e-05	0.00144269	0.010457	0.355187	2119.48	1817.86	2399.67	2283.07	2680.69	2536.04	3233.27	2409.89	1267.61	1617.83	1291.38	1609.06	1848.49	2415.09
Pcmtd1	5076.11	-1.56e-05	0.00144268	0.0109044	0.355187	4155.68	5644.67	5426.07	6536.26	6449.55	7161.32	5408.22	4349.54	3124.34	4141.27	3202.73	4455.02	6492.1	4518.78
Exph5	896.066	-1.56e-05	0.0014427	0.0109251	0.355187	713.489	812.348	994.126	983.284	765.155	1262.68	1833.01	791.122	580.318	768.961	690.686	665.817	898.764	785.158
Ptpn12	495.076	-1.82e-05	0.00144267	0.0108234	0.355187	455.111	456.293	501.866	622.332	701.613	626.594	508.983	474.804	383.948	437.752	357.128	410.046	540.494	454.098
Nos1ap	129.58	-1.88e-05	0.00144274	0.0102398	0.355187	121.975	66.8255	120.864	117.354	349.483	176.823	186.104	119.353	89.3924	71.8006	63.5689	110.97	100.377	119.232
Hnrnpa2b1	5304.75	-2.07e-05	0.00144269	0.0108884	0.355187	3861.89	5905.71	5263.59	6648.28	6563.39	7245.58	6122.37	5454.37	4685.04	4025.47	3963.41	4705.38	5282.94	4539.08
Mettl7a1	10122.3	-2.38e-05	0.00144267	0.0109277	0.355187	9405.85	10536.5	9851.62	13173.9	12929.5	10875.2	10980.1	8666.47	8046.79	8233.91	9595.33	9818.1	11305.6	8292.99
Pdzd8	2060.34	-2.45e-05	0.00144267	0.0105875	0.355187	1990.95	2237.61	2288.41	2387.98	2398.72	2317.09	2180.55	1837.26	1483.04	2142.44	1472.08	1898.66	2205.21	2004.75
Erap1	2121.92	-2.48e-05	0.00144267	0.0109963	0.355187	1895.86	2216.73	2214.77	2311.52	2765.41	2625.64	2195.13	1853.56	1692.59	1835.55	1707.07	2066.47	2268.53	2058.03
Rnf217	752.601	-2.52e-05	0.00144275	0.0107782	0.355187	685.946	623.357	867.659	1130.87	998.144	764.848	958.547	557.634	603.765	603.357	582.834	585.973	972.889	600.602
Dpp3	792.987	-2.88e-05	0.00144273	0.0109433	0.355187	737.752	775.803	659.549	750.354	616.89	627.187	811.682	771.556	937.888	980.889	1062.81	918.882	707.275	743.3
Tbc1d17	375.834	-0.000133837	0.0014457	0.0103895	0.355187	359.367	338.304	299.359	357.396	330.95	302.023	393.509	363.929	392.741	419.223	524.979	414.106	392.244	373.553
Neil1	98.588	3.09e-05	0.0014428	0.0112119	0.355633	95.7439	96.0617	109.658	64.0113	54.2757	80.6977	93.0519	123.919	120.167	107.701	120.709	116.383	95.7446	102.109
BC053749	59.2919	2.18e-05	0.00144274	0.0111813	0.355633	58.3644	53.2516	45.6242	39.118	37.0664	58.7432	52.692	99.1349	54.2216	72.9587	66.4259	78.4906	41.6952	72.3005
Pcgf1	33.7667	9.9e-06	0.00144269	0.0111155	0.355633	32.789	38.6335	28.0148	16.0028	15.8856	33.2284	13.4533	32.6102	64.4798	39.3745	47.141	48.7183	26.2526	36.1503
Ubr1	724.028	4.82e-06	0.0014425	0.0111736	0.355633	672.174	757.008	742.793	876.599	818.107	751.794	841.952	710.249	611.093	672.841	581.405	667.17	716.54	716.663
Hsph1	790.553	-7.19e-06	0.00144266	0.0111741	0.355633	768.574	683.918	984.521	890.823	1354.25	1088.83	624.457	786.557	479.202	728.429	591.405	667.17	786.032	633.581
Kbtbd8	130.029	-1.13e-05	0.00144269	0.0112041	0.355633	107.548	115.901	172.892	176.031	180.037	234.973	108.747	82.8298	121.632	107.701	87.8536	69.0176	179.135	76.1058
Clstn3	830.005	9.89e-06	0.00144269	0.0113578	0.358687	995.474	945.999	834.042	282.716	559.967	288.375	586.339	1037	1280.8	853.501	893.535	1097.52	1008.41	956.396
Phf1	343.37	-4.94e-05	0.00144296	0.0113543	0.358687	325.267	328.907	295.356	323.613	332.273	321.011	273.55	389.365	357.57	317.312	438.554	415.459	349.005	339.939
Wdr8	83.9362	1.21e-05	0.00144269	0.0114902	0.359727	84.5956	66.8255	88.847	42.6742	60.8947	67.0503	62.782	92.6128	121.632	97.2782	152.851	105.556	50.9608	80.5453
Ankrd33b	1373.44	-1.1e-05	0.0014427	0.0114526	0.359727	807.265	1160.05	1090.18	3483.28	2020.12	2311.16	1500.04	778.078	713.674	762.013	635.689	859.337	2305.59	801.648
Slain2	1867.38	-1.9e-05	0.00144271	0.0114711	0.359727	1539.77	1574.58	1826.57	2535.56	2663.48	2581.14	2330.78	1389.19	1411.23	1613.2	1363.52	1535.98	2395.16	1383.22
Ttpal	671.566	-2.38e-05	0.00144269	0.0114623	0.359727	775.132	606.651	663.551	890.823	820.755	794.516	644.637	555.025	786.947	609.147	587.833	591.386	514.241	561.28
Slc25a51	4258.9	1.31e-05	0.00144271	0.0115299	0.360192	3142.5	3103.21	3038.41	9457.66	7707.15	6902.02	5254.63	2287.28	2324.2	1893.45	2276.34	2282.99	7766.12	2188.68
Dguok	134.429	2.03e-05	0.00144268	0.0115576	0.36028	129.844	140.96	127.267	110.242	103.256	97.3119	123.322	157.833	175.854	115.807	168.565	156.981	125.086	149.675
Mroh2a	50.3736	1.08e-05	0.0014427	0.0116339	0.361747	51.1508	68.9138	37.6199	12.4466	14.5618	46.8758	26.9066	74.3511	73.2725	45.1649	66.4259	71.7242	44.7838	71.0321
Ovol1	13.8557	9.19e-06	0.00144269	0.0116715	0.361747	15.7387	10.4415	11.2059	8.89045	2.6476	10.6806	11.2111	16.9573	11.7236	13.8969	19.9992	20.2993	23.164	17.1238
Dynlt3	2402.92	-8.16e-06	0.00144266	0.0116798	0.361747	2282.11	2735.67	2457.3	3104.55	3208.89	3097.37	2452.98	1766.82	1547.52	1973.36	1432.8	2274.88	3270.76	2035.83
Ino80b	312.618	1.88e-05	0.00144267	0.0117967	0.363036	316.742	327.863	277.747	215.149	244.903	253.367	300.457	333.928	400.068	346.264	412.84	374.86	257.893	314.571
Zfp809	777.247	-1.53e-05	0.00144269	0.0117748	0.363036	798.084	778.935	1171.02	624.11	687.051	878.774	1315.06	732.424	589.111	604.515	837.109	637.398	568.291	659.584
Sbno2	512.346	-3.63e-05	0.00144288	0.0117834	0.363036	620.368	382.159	501.065	656.116	717.499	608.793	667.059	613.723	341.45	362.477	478.552	400.573	304.221	518.788
Slc39a7	1907.62	2.37e-05	0.0014427	0.0120311	0.363841	1916.19	2059.06	1671.29	2003.91	1374.1	1375.42	1491.07	2287.28	2168.87	2565.13	1989.21	2101.65	1812.97	1890.59
Nme4	37.5064	7.59e-06	0.00144269	0.0119271	0.363841	26.887	37.5894	28.8153	28.4495	25.1522	29.0749	12.3322	24.1315	87.927	40.5326	74.997	55.4848	30.8854	22.8317
Spon2	118.485	7.54e-06	0.00144269	0.0122253	0.363841	144.272	156.622	68.036	48.0085	33.095	42.1289	99.7786	210.009	155.338	144.759	148.565	109.616	77.2134	221.341
Ntrk1	17.6862	7.43e-06	0.00144269	0.012068	0.363841	25.5754	17.7505	9.60509	7.11236	6.61899	5.93365	12.3322	16.3051	38.1017	24.3196	22.142	27.0657	16.9869	17.758
Nek6	1661.57	-4.11e-06	0.00144263	0.0121004	0.363841	1757.49	1925.41	1479.18	1422.47	1306.59	1047.88	1202.95	1810.52	2177.66	1981.46	1955.64	1994.74	1348.15	1851.91
Snora33	5.32913	-5.63e-06	0.00144269	0.0119447	0.363841	5.24624	12.5298	7.20381	5.33427	6.61899	7.71375	5.60554	2.60881	7.32725	1.15807	2.85703	5.41315	3.08854	1.90264
Piezo2	35.9378	-8.43e-06	0.00144269	0.0121765	0.363841	22.2965	26.1037	38.4203	51.5646	54.2757	71.7972	56.0554	32.6102	20.5163	24.3196	9.28534	20.2993	43.2395	32.345
Jam2	421.909	-8.69e-06	0.00144269	0.0120653	0.363841	358.056	196.3	440.233	862.374	688.375	739.926	406.962	295.448	457.22	247.828	232.133	188.107	449.382	344.379
Zbtb45	233.995	-9.32e-06	0.00144268	0.0121933	0.363841	287.887	300.715	266.541	206.259	259.464	439.684	215.253	292.187	145.08	106.543	146.423	238.178	128.174	243.539
Polr3g	227.379	-1.74e-05	0.00144266	0.0118875	0.363841	214.44	234.934	273.745	232.93	272.702	321.011	215.253	200.879	175.854	200.347	177.85	257.124	200.755	205.486
Il15ra	988.373	-1.75e-05	0.00144269	0.0120343	0.363841	887.926	981.5	982.12	1116.64	1209.95	1364.74	1309.45	888.301	826.514	766.645	1277.09	809.266	643.96	773.108
BC005537	4109.29	-1.77e-05	0.00144268	0.0120051	0.363841	4257.32	3506.25	4845.77	4238.97	5823.39	4608.07	5169.43	3917.78	2791.68	3652.57	2722.75	3172.1	4527.79	4296.17
D230025D16Rik	950.415	-1.84e-05	0.00144269	0.0118773	0.363841	843.333	876.041	1107.79	1097.08	1289.38	1070.43	1235.46	684.813	833.841	641.573	1004.25	834.978	1105.7	681.147
Casd1	727.888	-2.69e-05	0.00144274	0.0121573	0.363841	599.383	697.492	761.203	860.596	933.278	1077.55	771.322	593.505	570.06	723.796	586.405	709.122	750.514	556.206
Ccdc90a	1351.52	-2.7e-05	0.00144267	0.0122228	0.363841	1512.88	1292.66	1466.38	1488.26	1490.6	1432.38	1587.49	1319.41	1040.47	1197.45	998.531	1265.32	1450.07	1379.42
Hnf4a	21568.5	-0.000116787	0.00144502	0.0121998	0.363841	18337.6	16136.3	19622.4	29511	36366.1	23881.2	29513.2	17612.7	18853	18941.5	19634.2	17139.4	20841.4	15569.3
Pcbp4	391.71	1.27e-05	0.00144269	0.0123382	0.366446	408.551	395.732	346.584	364.509	209.16	262.267	273.55	375.669	477.737	475.968	759.255	454.704	318.119	362.137
Prss8	86.7442	5.03e-05	0.0014431	0.0126374	0.367623	82.6283	97.1059	62.4331	55.1208	39.7139	70.6105	85.2042	91.9606	70.3416	85.6975	91.4249	96.0834	128.174	157.92
Dnpep	375.696	2.18e-05	0.00144267	0.012649	0.367623	344.284	303.847	336.978	348.506	301.826	351.272	371.087	336.537	436.704	392.587	526.407	442.525	435.483	331.694
Tnfaip8l1	1143.42	1.65e-05	0.00144268	0.0126825	0.367623	1089.25	1020.13	909.282	1153.98	1235.1	806.977	718.63	1030.48	1595.88	1581.93	1364.94	1384.41	1000.69	1116.22
Smyd4	98.8145	1.49e-05	0.00144268	0.012553	0.367623	100.334	103.371	108.057	55.1208	68.8375	72.3906	75.1142	103.7	145.08	116.965	110.71	135.329	81.8462	106.548
Trex1	272.748	1.38e-05	0.00144268	0.012759	0.367623	301.003	267.302	244.129	202.702	166.799	204.118	219.737	277.186	417.653	305.732	417.84	346.441	199.211	248.612
Gale	133.789	1.23e-05	0.00144269	0.0127541	0.367623	133.123	115.901	89.6475	136.913	88.6945	92.565	108.747	104.352	206.628	159.814	150.708	100.143	253.26	132.551
Ptpn13	27.2893	9.12e-06	0.00144269	0.0127403	0.367623	23.6081	22.9713	15.2081	21.3371	18.5332	20.1744	29.1488	43.6976	27.8435	42.8487	19.9992	18.946	33.9739	43.7608
Nr1d1	1292.63	8.29e-06	0.00144269	0.0126275	0.367623	1222.37	1733.29	1195.83	400.07	362.721	808.757	969.758	2118.36	1343.82	1959.46	1581.36	1379	901.852	2120.18
Acsl4	2270.22	-1.07e-05	0.0014427	0.0127381	0.367623	1798.15	1967.18	1865.79	5448.07	2899.12	3699.04	2136.83	1038.31	1708.71	1814.7	1264.95	1410.12	3363.42	1368.64
Adarb1	496.657	-1.36e-05	0.00144268	0.0125936	0.367623	525.28	433.322	471.45	672.118	552.024	667.536	701.813	511.327	274.039	399.536	297.845	374.86	572.923	499.127
Nucks1	4784.47	-1.42e-05	0.00144267	0.0127016	0.367623	4069.77	4227.76	4873.78	6545.15	6656.06	6261.19	5330.87	3644.51	4484.28	3559.92	3325.58	4445.55	5662.83	3895.35
Rprd1a	490.452	-1.58e-05	0.00144268	0.0127525	0.367623	394.124	492.838	519.475	697.012	528.196	825.371	454.048	361.973	407.395	404.168	496.409	414.106	481.812	389.408
Rnf169	2067.77	-1.84e-05	0.00144268	0.0127491	0.367623	1882.74	2337.85	2055.49	1989.68	2496.68	2912.83	2547.16	2263.14	1367.26	1568.03	1584.94	2101.65	1795.98	2045.34
Max	571.521	-2.34e-05	0.00144267	0.0125635	0.367623	609.22	571.15	582.709	641.891	663.223	668.129	644.637	508.718	512.907	548.927	365.7	499.363	628.517	556.206
Ulk2	2151.74	-8.12e-05	0.00144376	0.0124458	0.367623	1899.14	2055.93	2278.01	2409.31	2622.44	3204.17	2301.63	1775.95	1481.57	2025.47	1954.21	2048.88	2307.14	1760.58
Pacsin2	1585.17	2.14e-05	0.00144264	0.0128782	0.369706	1544.36	1650.8	1459.97	1216.21	1411.17	1282.26	1544.89	1961.83	1559.24	1817.02	1789.21	1698.37	1365.13	1891.86
Znf512b	754.175	1.01e-05	0.00144267	0.0128825	0.369706	646.599	793.553	723.583	440.967	454.063	558.357	803.834	1070.27	946.681	914.879	927.82	857.984	467.913	951.957
Fam135a	903.069	-2.52e-05	0.00144265	0.0129431	0.37071	814.479	999.251	1001.33	890.823	1011.38	1125.02	1013.48	810.036	861.685	881.294	696.4	742.954	972.889	821.943
Ccnt2	782.374	-2.7e-05	0.00144276	0.0130507	0.372318	663.649	735.081	810.829	762.801	835.317	1227.67	1146.89	695.901	641.867	616.095	638.546	637.398	852.436	688.757
Oxnad1	532.379	-3.34e-05	0.00144261	0.0130328	0.372318	503.639	527.295	584.309	567.211	586.443	599.299	594.187	481.978	507.046	496.814	521.408	451.998	517.33	514.348
Camsap2	787.939	-1.8e-05	0.00144268	0.013139	0.3741	711.521	807.127	866.059	958.391	937.249	996.853	898.007	828.95	540.751	663.577	512.836	637.398	830.816	841.603
Dph1	149.202	2.1e-05	0.00144269	0.0131899	0.37481	118.04	140.96	153.681	119.132	125.761	122.233	142.381	161.094	203.698	177.185	195.706	161.041	108.099	159.822
Smagp	386.693	1.37e-05	0.00144269	0.0132366	0.37527	413.141	421.836	316.167	273.826	219.751	291.342	284.761	340.45	523.166	444.7	746.398	489.89	316.575	331.694
Cd79a	14.5529	6.13e-06	0.00144269	0.0132839	0.37527	15.7387	8.35319	12.8068	7.11236	2.6476	8.90048	10.09	16.3051	33.7053	13.8969	40.7126	14.8862	4.6328	13.9527
Pias2	805.971	-3.12e-05	0.00144269	0.013265	0.37527	699.717	786.244	855.653	961.947	969.02	972.526	850.921	681.552	764.965	792.123	775.683	729.422	758.235	685.586
Hilpda	152.527	1e-05	0.0014427	0.0133838	0.377323	133.123	127.386	112.86	570.767	169.446	133.507	144.623	56.0895	190.508	113.491	90.7106	93.3768	1355.87	69.7636
Map3k5	1231.75	-7.87e-06	0.00144269	0.0134088	0.377323	927.273	913.63	872.462	2944.52	1985.7	1609.8	1667.09	1027.22	644.798	601.041	519.265	694.236	1853.12	984.302
H2-Ob	22.3363	7.77e-06	0.00144269	0.0135452	0.380422	26.2312	19.8388	15.2081	14.2247	14.5618	11.8673	10.09	13.0441	54.2216	24.3196	40.7126	18.946	24.7083	24.7344
Fbf1	1014.93	-3.84e-06	0.00144269	0.0135941	0.38084	854.481	396.777	417.021	4407.89	869.735	1389.07	2194.01	781.339	187.578	206.137	301.416	220.586	1394.47	588.551
Gm5415	5.32475	-5e-06	0.00144269	0.0136249	0.38084	5.24624	8.35319	8.00424	3.55618	5.29519	16.6142	4.48443	3.91322	1.46545	1.15807	2.85703	2.70657	7.72134	3.17107
Acvr2b	47.4754	-1.38e-05	0.0014427	0.0136427	0.38084	34.7563	35.5011	53.6284	56.8989	59.5709	79.5109	84.0831	39.1322	32.2399	53.2714	42.8554	37.892	18.5312	36.7845
Nkrf	149.771	-1.86e-05	0.00144267	0.0136654	0.38084	135.746	188.991	175.293	183.143	177.389	151.901	155.834	142.18	136.287	135.495	94.9962	132.622	132.807	154.114
Ppat	699.27	-6.76e-06	0.00144268	0.0137183	0.38158	438.061	585.768	613.125	1331.79	880.326	1200.38	878.948	397.192	470.409	541.979	558.549	502.069	935.826	455.366
C730027H18Rik	455.138	2.7e-05	0.00144278	0.0137802	0.381585	526.591	467.779	455.441	282.716	309.769	382.127	254.491	517.849	682.9	568.614	612.118	484.477	365.991	461.074
Nr1h2	663.896	2.26e-05	0.00144262	0.0137976	0.381585	655.78	560.708	581.108	681.009	620.861	557.763	612.125	650.899	751.776	753.906	792.825	830.918	620.796	624.067
Xylt2	621.592	2.2e-05	0.00144264	0.0137864	0.381585	617.089	645.284	558.696	597.439	505.691	491.9	559.433	703.075	677.038	693.686	717.828	749.721	508.064	677.342
Btf3	333.366	-1.94e-05	0.00144267	0.0138282	0.3817	314.119	343.525	354.588	481.863	426.263	345.932	326.242	260.881	348.777	309.206	234.276	311.256	341.283	268.907
Lrrc28	808.57	8.06e-06	0.00144268	0.0139653	0.38332	765.951	611.871	693.967	981.506	1301.29	1129.77	1228.73	722.641	511.442	433.12	471.41	696.943	997.597	773.742
Mir3064	172.312	-7.38e-06	0.00144269	0.0139664	0.38332	216.407	198.388	207.31	129.801	234.312	380.347	165.924	172.834	164.13	41.6907	42.8554	163.748	129.718	164.896
Baz1a	434.945	-1.79e-05	0.00144268	0.0139499	0.38332	409.862	355.011	436.231	485.419	574.528	604.639	557.19	427.193	382.482	340.474	299.988	336.968	466.369	412.874
Rab10	3115.81	-0.000115073	0.00144481	0.0140101	0.383792	2778.54	3087.55	3126.46	3709.1	3759.59	3519.84	3464.22	2638.16	2845.9	2897.5	2637.75	2996.18	3247.59	2912.95
Lysmd2	11.3535	-4.65e-06	0.00144269	0.01405	0.384158	10.4925	11.4856	6.40339	40.8961	11.9142	16.6142	11.2111	1.95661	8.7927	4.6323	4.28554	9.47301	16.9869	3.80529
Cdk2	251.222	2.41e-05	0.00144267	0.0141161	0.385177	211.817	232.845	244.93	252.489	207.836	218.358	234.311	284.361	287.228	233.931	336.415	288.25	233.184	251.149
Socs3	1200.34	-5.18e-06	0.00144269	0.0141938	0.385177	905.632	409.306	785.216	4548.36	1748.74	1357.62	1593.09	438.28	1471.31	670.525	1309.95	724.008	418.497	424.29
Prr3	225.867	-1.57e-05	0.00144268	0.0141921	0.385177	259.689	217.183	183.297	337.837	267.407	230.819	304.941	234.793	156.803	142.443	194.992	186.754	227.007	218.17
Ak4	3406.91	-2.52e-05	0.00144275	0.0141456	0.385177	3032.33	2692.86	3705.96	4096.72	5248.86	4527.97	3748.98	2462.07	2398.94	2648.52	3079.16	3433.29	3752.57	2868.55
Cyp4a31	264.016	-5.04e-06	0.00144269	0.0142508	0.385277	176.405	180.638	163.286	375.177	152.237	131.134	131.17	216.531	622.816	587.144	254.99	350.501	83.3905	270.81
Smarca5	508.404	-1.29e-05	0.00144269	0.0142258	0.385277	411.83	503.28	575.505	645.447	725.441	758.321	523.557	407.627	404.464	433.12	243.562	415.459	671.756	398.287
F630028O10Rik	36.408	-9.75e-06	0.00144269	0.0143036	0.385983	46.5604	53.2516	34.4182	51.5646	43.6853	61.1166	20.1799	26.7403	30.7744	26.6357	18.5707	20.2993	30.8854	45.0293
Zfp71-rs1	350.08	-3.02e-05	0.0014427	0.0143308	0.385999	362.646	404.086	408.216	325.391	370.664	450.364	326.242	324.145	313.606	335.842	290.703	355.914	307.309	325.986
Ttc39b	1180.94	-2.07e-05	0.00144272	0.0143768	0.386517	855.793	1031.62	1175.02	1509.6	1337.04	1845.96	1718.66	913.084	888.063	1051.53	952.104	1004.14	1351.23	899.317
1110008F13Rik	1097.35	2.19e-05	0.0014427	0.0144759	0.386732	1150.24	903.189	988.523	1024.18	910.773	875.807	923.792	956.782	1540.19	1198.61	1582.79	1335.69	965.167	1007.13
Pald1	346.243	1.99e-05	0.0014427	0.014621	0.386732	272.804	314.289	243.329	352.062	329.626	310.33	294.851	296.1	433.773	514.185	470.695	373.507	355.182	286.665
Rnf144a	123.584	1.13e-05	0.00144269	0.0144402	0.386732	133.779	111.724	122.465	81.7922	88.6945	77.1375	88.5675	150.007	186.112	162.13	87.8536	115.029	100.377	224.512
A230050P20Rik	778.784	7.38e-06	0.00144269	0.0144224	0.386732	779.722	959.573	605.921	423.186	426.263	431.376	534.768	1631.81	778.154	828.023	943.533	959.48	328.929	1272.24
Ltb	22.275	7.01e-06	0.00144269	0.0146255	0.386732	24.9196	20.883	12.8068	10.6685	13.238	14.2408	11.2111	17.6095	55.6871	27.7938	42.8554	9.47301	33.9739	16.4896
Opn3	78.5459	-9.97e-06	0.00144269	0.0145533	0.386732	63.6107	58.4723	80.8428	78.236	93.9897	111.553	179.377	65.8725	46.8944	50.9553	83.5681	52.7782	83.3905	50.103
0610043K17Rik	60.8361	-1.05e-05	0.00144269	0.0145481	0.386732	43.2815	68.9138	54.4288	69.3455	103.256	101.465	69.5087	54.1329	41.0326	26.6357	50.7122	59.5446	69.492	39.9555
Rpl38	20.37	-1.59e-05	0.00144272	0.0145988	0.386732	24.9196	19.8388	16.8089	35.5618	29.1236	19.5811	26.9066	15.6529	13.189	17.3711	10.7139	20.2993	23.164	12.0501
Irf2bpl	1362.13	-1.79e-05	0.00144269	0.0145181	0.386732	1278.77	1180.93	1409.55	1538.05	2102.19	1273.96	2014.63	1260.71	1003.83	1199.76	910.678	1180.07	1362.04	1354.68
Orm1	4953.69	-1.81e-05	0.00144268	0.0147337	0.388883	6917.82	5292.79	4122.98	6991.45	5802.21	4967.06	4741.16	4320.85	3961.11	3449.9	5586.92	4575.46	4518.53	4103.37
Klf16	180.59	1.48e-05	0.00144268	0.0149512	0.393906	159.355	203.609	160.085	152.916	112.523	116.893	182.741	227.619	162.665	171.395	264.989	165.101	202.299	246.075
Gmfb	1557.08	-1.79e-05	0.00144266	0.0150353	0.395402	1653.22	1727.02	1816.96	1753.2	1726.23	1955.73	1433.9	1528.76	1170.89	1359.58	994.96	1318.1	1738.85	1621.69
Rab40c	312.812	1.97e-05	0.00144267	0.0153763	0.397703	269.526	244.331	279.348	330.725	277.998	272.355	279.156	286.969	442.566	377.532	411.412	342.382	273.335	291.739
Wdr24	485.264	1.82e-05	0.00144267	0.0154803	0.397703	466.915	466.735	442.634	344.95	393.168	430.19	460.775	486.543	594.973	570.931	682.115	619.805	369.08	464.88
Gpr157	121.699	1.21e-05	0.00144269	0.0154009	0.397703	145.583	119.033	94.45	80.0141	48.9805	82.4778	131.17	141.528	111.374	157.498	127.852	152.921	125.086	185.825
Pias3	184.563	1.16e-05	0.00144269	0.0151592	0.397703	173.782	213.006	156.883	112.02	103.256	129.354	176.014	266.751	205.163	206.137	241.419	267.951	101.922	230.22
1810014B01Rik	94.0097	1.15e-05	0.00144268	0.0152482	0.397703	87.8745	105.459	105.656	42.6742	66.1899	72.9839	60.5398	90.6562	137.752	101.911	116.424	147.508	80.3019	100.206
Mtnr1a	161.407	9.95e-06	0.00144269	0.0153199	0.397703	151.485	172.285	129.669	184.921	76.7803	66.4569	115.474	120.658	278.435	240.879	183.564	135.329	222.375	181.385
Fam131c	159.645	9.77e-06	0.0014427	0.0152291	0.397703	222.965	166.02	136.072	53.3427	111.199	50.436	82.9619	262.838	233.007	147.075	193.564	216.526	92.6561	266.37
Slc52a2	304.475	8.33e-06	0.00144268	0.01532	0.397703	373.795	291.318	283.35	192.034	201.217	160.209	232.069	309.796	479.202	481.759	412.84	328.849	191.489	324.718
Fosb	39.1912	1.65e-06	0.00144269	0.0153021	0.397703	25.5754	18.7947	10.4055	7.11236	3.97139	2.96683	35.8754	26.0881	2.9309	28.9519	227.848	5.41315	134.351	18.3922
Nup62-il4i1	5.78762	-5.27e-06	0.00144269	0.0154685	0.397703	7.86936	5.22075	4.80254	12.4466	13.238	10.6806	3.36332	6.52203	2.9309	1.15807	2.85703	6.76643	0	3.17107
Il6ra	2336.79	-8.27e-06	0.00144269	0.0153856	0.397703	1852.58	2319.05	1721.71	3764.22	4430.75	3347.77	2759.05	1824.21	1342.35	1028.37	1033.53	2065.12	3567.26	1659.11
Zfp113	318.172	-1.34e-05	0.00144267	0.0154334	0.397703	301.659	280.876	390.607	296.941	383.901	462.825	402.478	250.446	269.643	303.415	361.414	309.903	196.122	244.173
Map4k5	451.866	-1.82e-05	0.00144268	0.0152227	0.397703	366.581	463.602	517.074	483.641	504.367	596.332	598.671	387.409	337.053	394.903	382.842	377.567	559.025	357.063
Myom1	22.7488	-8.01e-06	0.00144269	0.0155404	0.39854	36.7237	35.5011	17.6093	44.4523	25.1522	26.7014	13.4533	27.3925	14.6545	15.055	9.9996	18.946	16.9869	15.8554
Rxra	16022.8	5.22e-05	0.00144285	0.0156322	0.398542	15742.7	15486.8	15446.6	13380.1	15751.9	13563.1	16311	17230.6	16493.6	16986.6	16887.2	18686.2	15468.9	16883.4
Rpap3	100.554	2.69e-05	0.00144275	0.0158135	0.398542	76.0705	84.5761	96.8513	76.4579	84.7231	97.3119	102.021	105.005	140.683	92.6459	143.566	106.91	98.8331	102.109
Atrip	148.512	1.94e-05	0.0014427	0.0157102	0.398542	148.206	124.254	136.072	124.466	123.113	102.059	141.26	161.094	209.559	213.086	201.42	148.862	108.099	137.625
Pkn1	320.461	1.6e-05	0.00144268	0.0157764	0.398542	312.151	328.907	320.17	240.042	209.16	209.458	331.848	401.757	367.828	371.742	408.555	278.777	277.968	428.095
Foxf1	150.601	1.04e-05	0.00144269	0.0156515	0.398542	108.204	119.033	136.072	138.691	100.609	115.706	125.564	111.527	213.956	216.56	155.708	142.095	328.929	95.7665
Zfp358	349.066	1.01e-05	0.00144266	0.0157483	0.398542	342.973	308.024	315.367	293.385	300.502	264.641	276.914	336.537	430.842	539.663	476.409	441.172	219.286	341.208
Gm16907	107.588	-1.26e-05	0.00144269	0.0155901	0.398542	80.0052	92.9293	120.864	110.242	142.97	183.943	150.228	110.222	79.1343	69.4845	74.2827	96.0834	123.541	72.3005
Arnt	988.602	-1.38e-05	0.00144268	0.0156381	0.398542	893.828	805.039	903.679	1178.87	1509.13	1158.25	1522.46	940.477	669.711	679.79	651.402	847.158	1124.23	956.396
Glyat	5116.78	-1.64e-05	0.00144268	0.015816	0.398542	4736.7	4998.34	5071.49	5860.59	7030.69	7175.56	5481.09	3531.68	3599.15	4812.96	5164.08	4745.98	5899.1	3527.5
Nr3c1	3677.07	-1.91e-05	0.00144267	0.0157327	0.398542	3183.16	3373.65	4178.21	3716.21	5141.63	4294.78	4654.84	2855.34	2791.68	3258.82	3216.3	3442.76	4208.13	3163.46
Xiap	5556.53	-1.58e-05	0.00144269	0.0158859	0.399607	4142.56	5617.52	5236.37	6790.53	7490.05	9496.22	5801.73	3829.08	4934.17	4944.98	4264.11	4695.91	6433.42	4114.79
Ccnyl1	150.113	-2.06e-05	0.00144267	0.0159215	0.399807	140.337	143.048	164.887	213.371	182.684	175.636	144.623	143.485	142.149	123.914	134.28	125.856	118.909	148.406
Nedd4l	673.726	-1.11e-05	0.00144269	0.0159894	0.400816	676.765	517.898	500.265	1107.75	1364.84	790.362	627.82	642.42	467.479	553.559	402.127	523.722	647.048	610.115
Ppapdc1b	412.088	1.34e-05	0.00144268	0.0162597	0.403398	411.174	373.805	368.195	346.728	338.892	287.782	310.547	360.016	668.245	539.663	614.975	523.722	302.676	322.815
Dtx4	330.351	1.08e-05	0.00144269	0.0162559	0.403398	320.676	340.393	336.978	248.933	254.169	204.118	174.893	423.932	376.621	567.456	384.27	416.812	162.148	413.508
Fcrl1	9.5512	6.22e-06	0.00144269	0.0162347	0.403398	7.86936	9.39734	7.20381	5.33427	1.3238	6.52702	6.72664	13.6963	23.4472	12.7388	19.9992	8.11972	3.08854	8.24479
E130317F20Rik	23.9508	5.29e-06	0.00144268	0.016127	0.403398	28.8543	19.8388	22.4119	8.89045	15.8856	16.0209	14.5744	31.9579	48.3598	28.9519	23.5705	33.8322	12.3541	29.8081
Gm14405	21.5573	-8.71e-06	0.00144269	0.0162121	0.403398	21.6407	19.8388	30.4161	19.559	27.7998	42.1289	19.0588	15.0007	19.0508	20.8453	13.5709	18.946	23.164	10.7817
Ccp110	244.086	-1.42e-05	0.00144268	0.0161568	0.403398	226.244	218.227	295.356	208.037	271.379	339.998	390.145	261.533	196.37	150.55	202.849	192.167	245.539	218.804
Ftsjd2	639.175	3.59e-05	0.00144275	0.0166826	0.406831	616.433	665.123	569.902	517.424	630.128	580.311	547.1	739.598	675.572	675.157	822.824	679.35	577.556	651.973
Anapc7	387.883	3.33e-05	0.00144264	0.0170835	0.406831	382.975	393.644	349.785	336.059	357.426	335.845	385.661	447.411	419.119	374.058	398.555	424.932	399.965	424.924
2510049J12Rik	532.194	2.55e-05	0.00144272	0.0165833	0.406831	546.92	570.105	534.683	448.079	455.387	357.799	419.294	584.374	630.143	531.556	734.256	556.201	500.343	581.575
Taz	619.029	2.54e-05	0.00144267	0.017158	0.406831	582.988	600.386	560.297	560.099	509.662	554.796	596.429	616.332	738.587	651.996	851.394	690.176	583.733	569.525
Atp13a2	252.254	1.98e-05	0.00144268	0.0169989	0.406831	287.887	253.728	246.531	216.927	186.656	192.25	191.709	294.796	282.832	265.199	304.988	239.532	239.361	329.158
Slc19a1	292.043	1.66e-05	0.00144268	0.0170211	0.406831	334.448	300.715	263.339	195.59	244.903	187.503	264.581	326.102	376.621	266.357	334.272	377.567	267.158	349.452
Dcaf15	105.082	1.6e-05	0.00144268	0.0164648	0.406831	114.761	102.327	95.2504	85.3484	79.4279	68.8304	95.2941	129.136	130.425	98.4363	150.708	112.323	86.479	122.403
Sgk2	1098.56	1.56e-05	0.00144271	0.0169433	0.406831	1228.93	1219.57	1040.55	809.031	646.014	488.933	698.45	1069.61	1893.36	1680.37	1749.22	1062.33	738.16	1055.33
Kctd7	102.606	1.56e-05	0.0014427	0.0169711	0.406831	121.975	126.342	92.8492	49.7865	58.2471	71.2038	77.3564	132.397	121.632	121.598	100.71	133.975	103.466	124.94
Pddc1	333.384	1.41e-05	0.00144268	0.0173545	0.406831	329.202	347.702	260.138	398.292	255.493	176.823	235.433	302.622	476.271	356.687	372.128	437.112	381.434	338.037
Tssc4	418.101	1.37e-05	0.00144268	0.0168465	0.406831	451.177	389.468	400.212	360.952	356.102	281.848	247.765	396.539	618.42	591.776	522.122	557.554	335.106	344.379
Nmnat3	233.708	1.3e-05	0.00144268	0.0172738	0.406831	201.98	273.567	243.329	110.242	152.237	138.254	254.491	245.228	297.486	291.835	284.274	313.963	231.64	233.391
Bloc1s3	258.944	1.25e-05	0.00144268	0.0167738	0.406831	258.377	273.567	255.335	218.705	169.446	167.329	174.893	206.748	404.464	319.628	375.699	349.148	189.945	261.931
Cdc14a	68.2787	1.21e-05	0.00144268	0.0173445	0.406831	71.48	85.6202	55.2292	35.5618	34.4188	60.5232	50.4498	83.482	99.6506	74.1167	55.712	82.5505	83.3905	83.7164
Cdc42ep5	72.4621	9.35e-06	0.00144269	0.0166211	0.406831	85.2514	75.1787	64.8343	80.0141	37.0664	23.7346	28.0277	95.2216	120.167	76.4329	84.9966	70.3709	81.8462	91.327
Pask	14.6339	8.11e-06	0.00144269	0.0173937	0.406831	16.3945	16.7064	10.4055	1.77809	9.26659	11.2739	10.09	19.5661	24.9126	15.055	15.7137	14.8862	18.5312	20.2949
Bcl2l14	37.4202	7.72e-06	0.00144269	0.0171203	0.406831	28.8543	45.9426	44.8237	16.0028	11.9142	24.328	17.9377	30.0013	87.927	53.2714	56.4263	43.3052	33.9739	29.1739
Cenpm	22.9207	7.43e-06	0.00144269	0.0174076	0.406831	15.0829	19.8388	24.0127	17.7809	6.61899	21.9545	12.3322	28.6969	14.6545	10.4227	40.7126	33.8322	43.2395	31.7107
Mir2861	6.85481	5.9e-06	0.00144269	0.0171731	0.406831	5.90202	5.22075	3.2017	8.89045	3.97139	1.7801	4.48443	9.13084	4.39635	4.6323	14.2851	9.47301	12.3541	8.24479
B3gnt5	6.87392	5.69e-06	0.00144269	0.0172541	0.406831	2.62312	8.35319	8.00424	1.77809	1.3238	4.74692	3.36332	7.17423	13.189	3.47422	13.5709	6.76643	12.3541	9.51322
Sele	4.20919	-3.85e-06	0.00144269	0.0167815	0.406831	11.1483	9.39734	1.60085	8.89045	1.3238	5.93365	5.60554	1.95661	1.46545	0	0.714257	0	7.72134	3.17107
C230024C17Rik	11.9267	-5.41e-06	0.00144269	0.0169204	0.406831	12.4598	8.35319	13.6072	10.6685	23.8284	12.4607	33.6332	14.3485	1.46545	3.47422	2.85703	5.41315	12.3541	12.0501
Map3k13	411.51	-6.14e-06	0.00144269	0.0174011	0.406831	341.661	350.834	267.342	883.711	593.062	624.22	730.962	346.972	73.2725	123.914	189.992	193.52	701.098	340.573
Fbxl22	19.2923	-7.88e-06	0.00144269	0.0164709	0.406831	21.6407	18.7947	28.0148	26.6714	25.1522	30.855	16.8166	22.1749	16.1199	16.213	12.8566	6.76643	7.72134	20.2949
Usp2	1320.47	-9.03e-06	0.00144269	0.017213	0.406831	1117.45	1295.79	1203.04	2366.64	1714.32	1831.72	1741.08	1132.88	627.213	400.694	882.107	1368.17	1709.5	1095.92
Dsg1c	211.485	-9.18e-06	0.00144269	0.0165269	0.406831	345.596	262.081	250.533	140.469	291.236	180.976	321.758	181.312	67.4107	135.495	164.279	140.742	234.729	244.173
Slc39a14	10610.2	-9.55e-06	0.00144269	0.016878	0.406831	8792.04	5804.42	8935.13	18942	19471.7	13688.9	14168.6	7474.25	7104.5	7505.48	6919.01	8230.69	14015.8	7490.08
Zfp60	251.536	-1.1e-05	0.00144263	0.0168176	0.406831	265.591	304.892	280.148	240.042	284.617	294.902	291.488	264.142	211.025	228.141	192.849	220.586	151.338	291.739
BC031361	28.2773	-1.19e-05	0.00144269	0.0173151	0.406831	36.7237	32.3686	28.0148	26.6714	38.3901	40.9422	25.7855	23.4793	26.3781	19.6873	16.4279	33.8322	26.2526	20.9291
Ttll3	31.376	-1.23e-05	0.00144268	0.017282	0.406831	25.5754	34.4569	39.2208	35.5618	37.0664	45.0958	41.481	33.2624	26.3781	24.3196	25.7132	28.419	15.4427	27.2712
Atg14	793.807	-1.24e-05	0.00144268	0.0165498	0.406831	668.24	608.739	693.167	782.36	1354.25	1239.54	1121.11	555.025	687.296	567.456	786.397	671.23	829.272	549.23
Sbno1	1709.91	-1.44e-05	0.00144258	0.0172769	0.406831	1665.03	1669.59	1907.41	1840.32	1915.54	1988.96	1972.03	1832.69	1398.04	1429.06	1359.23	1711.91	1416.09	1832.88
E030024N20Rik	167.229	-1.49e-05	0.00144268	0.0170799	0.406831	186.242	156.622	180.095	220.483	243.579	192.25	152.471	104.352	146.545	156.34	120.709	142.095	220.83	118.598
Cpm	136.306	-1.59e-05	0.00144268	0.0174107	0.406831	112.138	115.901	132.07	179.587	173.418	196.404	165.924	108.918	99.6506	127.388	122.138	121.796	134.351	118.598
Pkn2	1750.64	-1.94e-05	0.00144267	0.0174091	0.406831	1476.16	1808.47	1862.59	2162.16	2344.45	2191.89	1683.9	1314.19	1537.26	1568.03	1466.37	1637.48	2010.64	1445.38
Btbd2	623.464	-0.000114637	0.00144492	0.0168834	0.406831	644.632	582.635	547.49	439.188	509.662	499.613	613.246	649.594	722.467	656.628	927.82	791.673	449.382	694.465
Thap4	294.978	2.58e-05	0.00144271	0.0176811	0.407933	258.377	323.686	250.533	256.045	264.76	226.072	281.398	348.276	298.952	301.099	418.555	324.789	248.627	328.523
Mkrn2	308.131	1.79e-05	0.00144264	0.0176507	0.407933	269.526	278.788	296.957	263.157	295.207	278.288	260.097	268.055	414.722	362.477	380.699	368.094	308.854	268.907
Gm14207	6.40724	6.02e-06	0.00144269	0.0176641	0.407933	7.21358	5.22075	4.00212	1.77809	2.6476	6.52702	1.12111	9.78305	8.7927	6.94845	13.5709	5.41315	4.6328	12.0501
Kbtbd12	19.2248	4.88e-06	0.00144269	0.0176835	0.407933	11.804	18.7947	11.2059	14.2247	3.97139	13.054	15.6955	9.13084	52.7562	37.0584	39.2841	20.2993	12.3541	9.51322
Sesn2	247.956	-7.85e-06	0.00144266	0.0175281	0.407933	259.689	334.128	176.093	199.146	161.503	180.976	179.377	300.666	218.352	284.886	246.419	301.783	325.84	302.521
Hipk3	4056.53	-1.39e-05	0.00144268	0.0175708	0.407933	3661.88	3572.03	4287.87	4767.06	6343.64	5185.42	4667.17	3615.16	2958.74	3173.12	2166.34	3561.85	4887.61	3943.55
Ednrb	359.084	-2.28e-05	0.00144272	0.0176802	0.407933	333.792	342.481	432.229	515.646	336.245	414.169	441.716	320.884	316.537	298.783	265.704	232.765	393.788	382.432
Slmo2	703.426	-4.06e-05	0.00144278	0.0176691	0.407933	689.225	680.785	834.842	807.253	746.622	753.574	751.142	625.463	668.245	701.793	541.407	698.296	687.199	662.12
Unc119b	1358.27	2.87e-05	0.00144279	0.018147	0.409382	1556.82	1336.51	1327.9	970.838	1093.46	949.384	945.094	1248.32	1840.61	1823.97	1852.78	1659.13	982.154	1428.89
Flad1	822.78	2.74e-05	0.00144269	0.0178682	0.409382	732.506	791.465	770.808	757.467	734.708	719.752	747.779	827.646	1087.36	919.511	992.817	989.253	667.124	780.719
Pja1	1952.84	2.36e-05	0.00144263	0.0182299	0.409382	1594.2	2046.53	1689.69	1959.46	1885.09	1685.75	1753.41	2019.22	2286.1	2340.47	2353.48	2077.3	1894.82	1754.24
Klhl5	881.068	1.92e-05	0.00144266	0.0179205	0.409382	813.823	986.721	877.265	608.107	632.776	751.2	865.495	990.044	857.288	1013.31	1087.1	1035.26	789.121	1027.43
Lrrc56	108.29	1.63e-05	0.00144268	0.0182022	0.409382	105.581	113.812	98.4521	74.6798	68.8375	99.6853	97.5363	166.964	112.84	112.333	124.995	128.562	84.9347	126.843
8430408G22Rik	2248.41	9.63e-06	0.0014427	0.0179851	0.409382	1198.77	1712.4	628.333	3325.03	1019.32	1137.48	1529.19	1337.02	1091.76	4047.47	4853.38	1332.99	6601.74	1662.91
Commd5	569.45	8.82e-06	0.00144268	0.018157	0.409382	535.772	562.796	562.698	362.731	418.32	412.389	373.329	418.714	1088.83	662.418	984.96	732.128	424.674	432.535
Phf11c	108.375	7.58e-06	0.00144268	0.0182363	0.409382	102.302	173.329	76.0403	215.149	109.875	132.32	93.0519	71.7423	63.0143	79.9071	115.71	96.0834	704.186	83.7164
Exoc3l4	22.8885	7.48e-06	0.00144269	0.0180512	0.409382	30.1659	22.9713	17.6093	10.6685	5.29519	12.4607	17.9377	48.9152	29.309	24.3196	24.2847	23.0059	15.4427	38.0529
Ppapdc3	20.6703	7.23e-06	0.00144269	0.0179204	0.409382	18.3618	10.4415	15.2081	7.11236	15.8856	17.801	13.4533	8.47864	30.7744	24.3196	24.999	50.0716	41.6952	10.7817
A230001M10Rik	11.8476	4.76e-06	0.00144268	0.0178499	0.409382	12.4598	9.39734	9.60509	12.4466	5.29519	10.0872	3.36332	17.6095	10.2581	12.7388	17.1422	12.1796	12.3541	20.9291
Stoml1	169.26	2.55e-06	0.00144266	0.0180567	0.409382	163.289	198.388	148.879	126.244	91.3421	142.408	126.685	177.399	234.472	186.45	254.99	242.238	129.718	147.138
1700015E13Rik	22.9826	-7.83e-06	0.00144269	0.017915	0.409382	18.3618	13.5739	19.2102	26.6714	71.4851	30.855	26.9066	20.8705	10.2581	12.7388	12.1424	18.946	20.0755	19.6607
Crb3	263.962	-7.89e-06	0.00144267	0.0182558	0.409382	229.523	219.271	267.342	211.593	246.226	198.184	164.803	218.488	429.377	364.793	429.268	322.082	188.401	206.12
Eif3e	203.63	-1.22e-05	0.00144268	0.0182447	0.409382	194.111	220.315	217.715	266.714	293.883	249.213	209.647	111.527	205.163	211.928	104.282	165.101	257.893	143.333
C330022C24Rik	48.5197	-1.31e-05	0.0014427	0.018244	0.409382	43.9373	62.6489	54.4288	51.5646	64.8661	86.0379	36.9965	31.3057	65.9452	28.9519	29.2845	47.365	41.6952	34.2476
Med13	1532.03	-1.91e-05	0.0014427	0.0177917	0.409382	1256.47	1504.62	1638.47	1760.31	1932.75	2120.69	1856.55	1464.85	1225.12	1287.78	868.536	1299.16	1640.01	1593.15
Usp15	627.848	-2.27e-05	0.00144266	0.0179679	0.409382	597.416	601.43	630.734	727.239	816.784	703.138	716.388	540.024	477.737	572.089	569.263	522.369	727.35	587.917
Naa30	1359.47	-1.66e-05	0.00144267	0.0183033	0.409812	1114.17	1411.69	1504	1621.62	1866.56	1743.9	1381.2	1036.35	1266.15	1159.23	895.678	1330.28	1601.41	1100.36
Fzd8	611.99	9.36e-06	0.00144268	0.0184086	0.410412	563.315	622.313	661.951	389.402	268.731	325.757	669.301	675.03	713.674	1109.44	679.258	737.541	506.52	645.631
Wsb1	1022.47	-6.16e-06	0.00144268	0.0184131	0.410412	885.959	652.593	971.715	1488.26	1505.16	1459.08	1816.19	562.199	684.365	846.552	1194.95	414.106	1331.16	502.298
Lifr	5011.23	-9.68e-06	0.00144269	0.0184277	0.410412	3551.05	4073.23	5273.99	7526.66	5244.89	7672.8	8789.48	2429.46	4101.79	5593.5	5835.48	3640.34	4086.13	2338.35
Tmem214	1262.81	-1.12e-05	0.00144261	0.0184435	0.410412	1195.49	1093.22	1088.58	1383.35	1033.89	1087.04	1119.99	1180.49	1310.11	1777.64	1600.65	1349.23	1324.98	1134.61
Exoc3l	77.5707	1.32e-05	0.00144268	0.0189292	0.41074	81.9725	53.2516	76.8407	72.9017	38.3901	71.7972	67.2664	106.961	83.5306	106.543	92.8534	94.7301	57.1379	81.8137
Fam195b	344.189	1.19e-05	0.00144268	0.0185938	0.41074	369.204	300.715	284.15	302.275	243.579	266.421	244.401	255.011	621.351	379.848	557.12	412.752	299.588	282.226
Mettl1	193.636	1.1e-05	0.00144269	0.0187762	0.41074	165.912	161.843	165.688	177.809	157.532	162.582	122.201	151.963	375.155	279.096	244.276	266.598	145.161	135.088
Rps6kl1	21.6575	1.1e-05	0.00144269	0.0188866	0.41074	15.0829	19.8388	14.4076	14.2247	18.5332	18.3943	24.6644	28.0447	24.9126	25.4776	21.4277	31.1256	18.5312	28.5397
Gm16880	9.93781	5.47e-06	0.00144269	0.018808	0.41074	12.4598	15.6622	4.80254	3.55618	1.3238	2.37346	3.36332	14.3485	5.8618	13.8969	14.2851	9.47301	12.3541	25.3686
Celf1	3915.63	4.34e-06	0.00144253	0.0188372	0.41074	3560.23	3829.94	4062.15	4502.13	4674.33	4651.98	4222.09	3780.82	3508.29	3671.1	2891.31	3728.31	3965.68	3770.41
Tnnc1	15.3435	-5.22e-06	0.00144269	0.018752	0.41074	7.21358	7.30904	12.8068	30.2275	25.1522	43.909	23.5433	11.7397	1.46545	1.15807	13.5709	6.76643	18.5312	11.4159
Ccar1	1027.4	-7.23e-06	0.00144266	0.0186303	0.41074	888.582	883.35	1066.97	1410.03	1556.79	1416.96	1021.33	1209.84	707.812	701.793	688.544	818.739	1071.72	941.175
Wwp1	3318.81	-1.06e-05	0.00144265	0.0186711	0.41074	2657.88	3254.61	3342.57	3876.24	5001.31	4434.81	3507.95	2548.81	2605.57	2535.02	2872.74	3166.69	3919.35	2739.81
Rc3h1	1364.06	-1.27e-05	0.00144268	0.0188081	0.41074	1308.94	1152.74	1384.73	1365.57	1963.19	2005.57	1782.56	1403.54	873.408	977.415	859.965	1009.55	1507.21	1502.46
Mier3	599.863	-1.4e-05	0.00144266	0.0187647	0.41074	434.782	566.973	643.541	757.467	791.631	804.603	696.208	615.027	512.907	487.549	424.269	548.081	589.91	525.13
Fam214a	3533.97	-1.5e-05	0.0014427	0.0189411	0.41074	2239.49	4057.56	2791.08	4365.21	4347.35	5996.55	4999.02	3192.53	2687.64	2423.85	2427.04	3161.28	4134	2652.92
Kynu	2514.01	-1.68e-05	0.00144267	0.0185254	0.41074	1733.23	2465.24	2712.64	3527.73	2883.23	3596.98	2748.96	2051.83	2354.98	2103.06	2274.91	2254.58	2473.92	2014.9
Ddx19b	788.842	-1.85e-05	0.00144267	0.0185953	0.41074	837.431	764.317	1012.54	649.003	934.602	914.376	1001.15	742.859	800.136	800.229	611.404	719.949	508.064	747.739
Rbm27	623.737	-1.93e-05	0.00144267	0.0188714	0.41074	540.363	583.679	661.15	681.009	827.374	902.508	627.82	487.848	594.973	602.199	522.122	575.147	637.783	488.345
Casp8ap2	300.772	-5.49e-05	0.0014431	0.0185094	0.41074	299.036	318.465	356.989	252.489	329.626	363.139	377.813	300.013	278.435	276.78	312.845	236.825	236.273	272.078
Slc10a5	2027.57	-0.000345904	0.00146443	0.0187042	0.41074	1897.83	1838.75	2590.17	1491.82	2378.87	3166.79	2631.24	1547.03	1786.38	2106.54	1594.94	1651.01	1904.08	1800.54
AW549542	245.884	7.66e-06	0.00144268	0.0190581	0.412376	210.505	295.494	226.52	117.354	156.208	162.582	214.132	396.539	307.744	224.666	369.271	323.436	118.909	319.01
Tank	445.978	-2.01e-05	0.00144266	0.0190735	0.412376	400.682	518.942	503.467	384.068	536.138	576.751	498.893	371.756	468.944	442.384	347.843	408.693	440.116	345.013
Zfpl1	149.679	1.77e-05	0.00144267	0.0192802	0.412665	141.648	137.828	140.074	117.354	124.437	127.574	141.26	166.312	200.767	166.763	191.421	189.46	103.466	147.138
Mogat2	10.2589	6.02e-06	0.00144269	0.0192576	0.412665	6.5578	10.4415	3.2017	5.33427	3.97139	10.6806	8.96886	21.5227	2.9309	11.5807	14.2851	18.946	6.17707	19.0264
Cyp4v3	9583.06	-1.08e-05	0.0014426	0.0192735	0.412665	8523.83	10040.5	9254.5	12603.1	10892.2	10538.2	11270.5	8545.82	6899.34	10132	8171.81	8754.41	9894.12	8642.45
Metap2	959.613	-1.49e-05	0.00144257	0.0192079	0.412665	950.225	955.396	958.908	1274.89	1086.84	1005.16	1015.72	892.214	854.357	887.085	719.971	928.355	1009.95	895.511
Srsf10	1173.97	-1.56e-05	0.00144267	0.0192591	0.412665	963.997	1171.54	1264.67	1262.44	1632.24	1771.79	1142.41	900.04	1179.69	900.982	937.105	1119.17	1283.29	906.293
Parg	466.38	-2.14e-05	0.00144266	0.0192234	0.412665	478.719	466.735	523.477	442.745	593.062	532.842	530.284	466.977	360.501	419.223	327.844	431.698	447.838	507.372
Pah	17256.5	-3.16e-05	0.00144284	0.0192866	0.412665	11042.7	15410.6	16521.5	34738.6	26122.5	21666.7	18735.9	10497.9	13644.8	13896.9	10704.6	16728	21811.2	10068.8
Arf2	351.719	1.45e-05	0.00144268	0.0193264	0.412716	315.43	376.938	343.382	286.273	260.788	286.002	257.855	269.36	553.94	433.12	477.124	420.872	336.65	306.326
Pkdrej	95.9082	-6.9e-06	0.00144269	0.0194212	0.412716	76.0705	120.077	68.8365	190.256	63.5423	106.806	233.19	125.223	35.1708	62.536	77.854	52.7782	33.9739	96.4007
Ptar1	88.7409	-1.25e-05	0.00144269	0.0194317	0.412716	96.3997	75.1787	124.866	69.3455	104.58	116.3	139.017	81.5254	70.3416	85.6975	47.141	46.0118	89.5675	96.4007
Pikfyve	923.064	-1.41e-05	0.00144266	0.0194147	0.412716	788.903	878.129	923.689	1171.76	1031.24	1460.27	987.696	729.163	772.292	875.504	682.115	791.673	1087.16	743.3
Dennd1b	924.548	-1.65e-05	0.00144258	0.0193927	0.412716	883.991	1004.47	1057.36	851.705	1018	1068.65	1087.47	804.166	848.496	917.195	738.542	786.26	1040.84	836.529
Cntf	8.6839	-6.65e-06	0.00144269	0.0195296	0.414187	10.4925	10.4415	16.8089	7.11236	13.238	8.30711	12.3322	7.17423	1.46545	2.31615	7.14257	5.41315	12.3541	6.97636
Axin1	609.7	5.05e-05	0.001443	0.0197042	0.414246	574.463	595.165	609.123	524.537	579.824	485.373	543.737	702.423	624.282	701.793	802.825	661.757	509.608	620.896
Amz2	259.879	2.47e-05	0.00144265	0.0195848	0.414246	270.181	253.728	242.528	234.708	243.579	225.479	202.92	250.446	253.523	292.993	323.558	299.076	267.158	278.42
Gtl3	409.784	2.09e-05	0.00144266	0.0196871	0.414246	360.679	448.984	364.193	314.722	301.826	389.248	414.81	368.495	493.857	429.646	516.408	472.297	454.015	407.8
2310061J03Rik	180.445	1.29e-05	0.00144268	0.0196968	0.414246	164.601	173.329	179.295	113.798	145.618	149.528	144.623	129.136	233.007	250.144	269.989	259.831	152.883	160.456
Tmem50a	1302.11	-8.23e-06	0.00144267	0.0196474	0.414246	1365.99	1099.49	1061.36	2178.16	1853.32	1486.38	1484.35	1151.14	816.256	850.026	944.962	1222.02	1646.19	1069.92
Ccdc117	1035.37	-1.52e-05	0.00144268	0.0196532	0.414246	950.225	958.529	1248.66	835.703	1694.46	1420.52	1086.35	725.25	1017.02	949.621	966.39	1025.79	874.056	742.666
Mcat	896.521	8.48e-06	0.00144268	0.0197993	0.414438	828.906	807.127	795.621	640.113	684.404	736.96	650.242	547.198	1617.86	1007.52	1605.65	1127.29	880.233	622.165
Rps13	78.7774	-1.29e-05	0.00144268	0.0197577	0.414438	70.8242	85.6202	81.6432	97.795	119.142	91.9716	82.9619	52.1762	98.1851	67.1683	48.5695	59.5446	89.5675	57.7136
Ctdspl2	299.275	-1.75e-05	0.00144267	0.0197737	0.414438	240.015	298.627	344.182	280.938	387.873	398.148	373.329	255.011	256.454	287.202	222.134	270.657	330.473	244.807
Orai3	599.93	1.25e-05	0.00144268	0.0199299	0.41657	617.089	517.898	565.9	483.641	504.367	438.497	424.9	492.413	951.077	757.381	965.675	725.362	403.054	551.767
Gramd1a	195.328	2.05e-05	0.00144266	0.0200309	0.417474	184.93	173.329	160.085	222.261	181.36	176.823	142.381	228.271	221.283	201.505	252.133	216.526	196.122	177.58
Ints6	298.655	-2.83e-05	0.00144264	0.0200032	0.417474	272.149	318.465	333.777	318.278	332.273	313.89	350.907	275.882	247.661	305.732	267.846	270.657	296.499	277.152
Fst	79.9044	2.67e-06	0.00144269	0.0201497	0.419346	76.7263	38.6335	56.0297	97.795	29.1236	14.2408	75.1142	75.0033	48.3598	211.928	89.9964	58.1913	171.414	76.1058
Thra	215.129	3.89e-06	0.00144267	0.0202025	0.419841	217.719	223.448	237.726	90.6826	158.856	113.333	186.104	317.623	247.661	275.622	227.134	262.538	134.351	319.01
Rgs11	4.33155	4.2e-06	0.00144269	0.0202782	0.420809	2.62312	1.04415	2.40127	3.55618	3.97139	2.96683	2.24221	6.52203	10.2581	2.31615	11.4281	4.05986	1.54427	5.70793
Marveld2	231.133	4.07e-05	0.00144293	0.0203564	0.421223	233.458	226.58	199.306	172.475	218.427	171.483	184.983	290.883	274.039	320.787	262.847	255.771	134.351	290.47
Zfyve19	275.483	1.42e-05	0.00144268	0.02034	0.421223	238.048	269.39	222.518	215.149	231.665	241.5	247.765	270.012	344.381	294.151	474.267	361.328	245.539	201.046
Ube2w	955.944	-1.94e-05	0.00144271	0.0204401	0.422352	856.449	951.22	1050.96	1422.47	1153.03	1305.4	867.737	564.808	1056.59	896.349	679.258	910.762	1013.04	655.144
Hspa4l	410.516	-3.36e-05	0.00144284	0.0204825	0.422623	389.533	401.997	408.216	599.217	529.519	526.908	420.415	415.453	241.799	294.151	256.418	361.328	471.002	431.266
Sfxn1	3264.94	-2.19e-05	0.00144264	0.0205459	0.423328	3535.97	2995.66	3481.84	3931.36	3587.49	3604.1	3609.97	3117.53	2412.13	2701.79	2607.75	3226.24	3477.69	3419.69
Tceanc2	407.954	3.04e-05	0.00144273	0.0205822	0.423472	417.732	374.849	401.012	327.169	356.102	383.907	339.696	428.497	509.977	460.914	524.265	447.938	339.739	399.555
Rab3a	83.4713	1.7e-05	0.00144271	0.0207481	0.424471	87.2187	99.1942	76.8407	39.118	54.2757	61.1166	67.2664	87.3952	123.098	103.069	108.567	105.556	52.5051	103.377
Ythdc1	855.663	7.96e-06	0.00144265	0.0207401	0.424471	729.227	708.977	815.632	1013.51	1118.61	1268.02	1131.2	744.164	700.485	716.848	619.261	707.769	1073.27	632.312
Greb1	5.38601	-4.03e-06	0.00144269	0.0206935	0.424471	3.2789	8.35319	8.00424	8.89045	2.6476	13.6474	7.84775	3.26102	1.46545	1.15807	0.714257	2.70657	7.72134	5.70793
Lin7a	1483.61	-1.59e-05	0.00144269	0.0206757	0.424471	1150.24	1520.28	1843.38	1401.14	1873.17	2317.68	1689.51	1313.54	902.717	1146.49	1088.53	1618.53	1612.22	1293.16
Rad18	27.6889	1.14e-05	0.00144268	0.0208088	0.424684	22.2965	30.2803	26.414	16.0028	17.2094	22.5479	23.5433	35.219	36.6362	25.4776	22.8562	29.7723	43.2395	36.1503
Unkl	623.071	9.02e-06	0.00144265	0.0208466	0.424684	622.991	558.62	680.36	428.52	561.29	488.34	484.318	661.986	927.63	810.652	723.542	676.643	452.47	645.631
Vpreb3	4.51895	-4.55e-06	0.00144269	0.0208349	0.424684	7.86936	1.04415	5.60297	5.33427	18.5332	4.15356	3.36332	1.30441	4.39635	1.15807	0.714257	1.35329	4.6328	3.80529
Yipf2	226.887	3.06e-05	0.00144278	0.0209146	0.425469	207.226	214.051	190.501	213.371	215.779	184.537	182.741	191.748	316.537	272.147	319.987	251.711	223.919	192.167
Bdp1	540.287	-2.15e-05	0.0014427	0.0210153	0.426427	482.654	561.752	618.728	487.197	673.813	715.598	667.059	637.855	378.086	452.807	404.269	451.998	509.608	522.593
Kdm6a	363.42	-3.86e-05	0.00144284	0.0210206	0.426427	338.382	355.011	381.802	362.731	410.377	474.692	450.685	302.622	312.141	403.01	284.989	323.436	372.169	315.839
Reep4	131.49	1.04e-05	0.00144268	0.0211072	0.427584	151.485	146.181	111.259	67.5675	92.6659	69.4237	126.685	183.921	131.89	132.02	158.565	177.281	100.377	191.533
Nudt16l1	417.735	2.59e-05	0.00144278	0.0212213	0.428138	400.026	464.646	345.783	257.823	305.797	341.778	335.211	270.664	684.365	438.91	638.546	569.734	438.572	356.429
Bpgm	454.366	1.75e-05	0.00144267	0.0212737	0.428138	443.963	469.867	454.641	357.396	308.445	343.558	452.927	436.324	619.885	511.869	602.119	500.716	437.028	422.387
Lilra6	5.16214	-4.44e-06	0.00144269	0.0212341	0.428138	10.4925	5.22075	2.40127	7.11236	9.26659	3.56019	13.4533	3.26102	4.39635	1.15807	6.42831	2.70657	1.54427	1.26843
Pcm1	710.241	-1.01e-05	0.00144268	0.0212355	0.428138	591.514	604.562	717.98	590.326	808.841	1312.52	1140.17	570.678	706.347	522.291	509.979	519.662	789.121	559.378
Taf9b	37.1185	-1.03e-05	0.00144268	0.0213641	0.428138	31.4774	36.5452	36.8195	65.7894	50.3043	50.436	35.8754	20.2183	39.5671	27.7938	38.5699	21.6526	38.6067	26.0028
Klhl28	153.548	-1.56e-05	0.00144267	0.0213353	0.428138	131.812	139.916	172.091	138.691	191.951	227.259	200.678	132.397	131.89	159.814	127.852	108.263	151.338	135.722
Bzw1	3189.69	-1.71e-05	0.00144267	0.0212876	0.428138	2890.68	3150.2	2975.18	4765.28	4155.4	3822.46	3041.56	2401.41	2813.66	2694.84	2582.75	3130.15	3584.25	2647.85
Arih1	1985	-2.34e-05	0.00144265	0.0213714	0.428138	1920.12	1853.36	2172.35	2238.62	2413.28	2386.51	2048.26	1820.3	1570.96	1856.39	1559.22	1760.63	2231.47	1958.46
Pgm2l1	242.612	-1.47e-05	0.00144267	0.0214259	0.428637	215.752	258.949	272.945	264.936	317.712	312.11	266.824	217.184	172.923	162.13	169.993	201.64	285.69	277.786
Cacul1	2134.82	0.000156731	0.00144687	0.0221497	0.428885	2265.72	2036.09	2558.96	1772.76	2646.27	2258.35	2685.05	1987.91	2091.2	1775.33	1954.21	1982.57	1689.43	2183.6
Pold3	251.01	3.65e-05	0.00144277	0.023	0.428885	228.211	247.463	241.728	229.374	223.722	244.466	207.405	299.361	279.901	287.202	282.846	285.544	214.653	242.27
Fermt2	2110.72	2.55e-05	0.00144264	0.0231936	0.428885	1735.19	2196.89	1883.4	1783.43	2078.36	2195.45	1801.62	2115.09	2196.71	2741.16	2370.62	2312.77	2090.94	2048.51
Impa2	77.8199	2.37e-05	0.00144275	0.0231634	0.428885	88.5303	77.267	57.6305	37.3399	63.5423	53.9962	86.3253	85.4386	80.5997	93.804	97.8532	90.6702	64.8592	111.622
Ehmt2	995.958	2.1e-05	0.00144265	0.0227731	0.428885	954.816	1026.4	942.899	867.708	791.631	809.35	964.152	1389.19	999.437	1060.8	1072.1	1062.33	840.082	1162.52
Dbnl	484.877	1.94e-05	0.00144266	0.0219139	0.428885	481.998	508.501	440.233	392.958	386.549	379.16	474.228	535.459	590.576	515.343	671.401	458.764	407.687	545.425
Wdr73	733.125	1.92e-05	0.00144273	0.0225863	0.428885	714.144	633.798	673.957	654.337	575.852	468.165	510.104	484.587	1395.11	844.236	1156.38	994.666	616.163	542.254
Nup210	300.189	1.73e-05	0.00144267	0.0235963	0.428885	263.624	323.686	248.932	270.27	184.008	272.355	308.305	401.105	275.505	348.58	296.417	320.729	282.601	406.532
Klc2	212.992	1.71e-05	0.00144267	0.0234157	0.428885	208.538	223.448	198.505	177.809	157.532	158.428	207.405	312.405	247.661	226.983	207.135	192.167	203.843	260.028
Rfc5	97.2266	1.66e-05	0.00144267	0.0227806	0.428885	93.1208	80.3995	82.4437	99.5731	82.0755	84.8512	80.7197	88.6996	109.909	111.175	141.423	110.97	112.732	83.0822
Fam89b	333.961	1.48e-05	0.00144267	0.0228825	0.428885	361.335	335.172	310.564	284.495	263.436	215.392	287.003	330.015	413.257	359.003	509.265	404.633	284.145	317.742
Rnf215	284.831	1.45e-05	0.0014426	0.0236625	0.428885	297.068	297.582	260.138	236.486	248.874	252.18	237.675	317.623	326.795	277.938	348.557	322.082	242.45	322.181
Smo	165.531	1.43e-05	0.00144267	0.02322	0.428885	162.633	192.123	113.66	144.025	90.0183	147.748	165.924	159.79	184.647	210.77	213.563	175.927	171.414	185.191
Cirbp	375.937	1.42e-05	0.00144268	0.0232168	0.428885	300.347	519.986	303.361	327.169	217.103	258.114	341.938	481.978	527.562	339.316	385.699	464.177	375.257	421.119
Krba1	278.825	1.4e-05	0.00144264	0.0222659	0.428885	278.706	250.596	264.14	222.261	227.693	245.06	263.46	377.626	315.072	338.158	318.559	284.19	194.578	323.45
Mad2l2	112.052	1.29e-05	0.00144268	0.0233771	0.428885	126.566	119.033	72.8386	113.798	97.9611	77.1375	65.0242	114.788	171.458	126.23	119.281	147.508	111.187	105.914
Gpr137	540.867	1.28e-05	0.00144268	0.0228119	0.428885	493.147	439.587	445.036	535.205	358.749	522.755	442.837	438.933	738.587	679.79	949.247	644.165	450.926	433.169
Plk2	212.396	1.26e-05	0.00144268	0.0230356	0.428885	204.603	191.079	160.085	236.486	123.113	135.881	217.495	216.531	206.628	331.209	202.849	201.64	336.65	209.291
Nr2f6	5374.03	1.04e-05	0.00144268	0.0226996	0.428885	4831.13	4812.48	4710.49	4363.43	4504.89	4399.21	3365.56	3592.33	9096.05	7234.49	9872.46	6449.77	4269.9	3734.26
Hdhd3	565.895	1.04e-05	0.00144269	0.0231297	0.428885	501.672	511.633	553.093	337.837	426.263	450.958	443.959	422.628	959.87	831.497	960.676	759.194	321.208	442.048
Pllp	563.903	9.77e-06	0.00144269	0.0230369	0.428885	565.282	468.823	549.891	458.747	426.263	307.363	354.27	393.931	1172.36	699.477	993.531	744.308	333.562	426.827
Fkbp11	66.3497	9.71e-06	0.00144269	0.0217572	0.428885	55.0855	84.5761	47.225	62.2332	31.7712	41.5356	52.692	54.1329	93.7888	121.598	92.8534	73.0775	69.492	48.8345
Homez	174.42	9.64e-06	0.00144268	0.0219153	0.428885	193.455	178.549	200.106	94.2388	104.58	100.279	140.138	185.878	250.592	257.092	187.85	227.352	121.997	199.778
Tapbpl	499.026	9.49e-06	0.00144262	0.0228233	0.428885	538.395	550.267	457.042	346.728	428.911	375.007	446.201	578.504	492.391	467.862	651.402	613.039	503.431	537.18
Lamc3	75.0375	9.3e-06	0.00144269	0.0227179	0.428885	82.6283	66.8255	61.6326	56.8989	38.3901	26.7014	73.9931	125.223	92.3233	55.5876	59.9976	66.3111	77.2134	166.799
Smim6	38.3497	9.15e-06	0.00144269	0.0237022	0.428885	29.5101	32.3686	35.2186	24.8933	29.1236	39.7555	22.4221	39.7844	43.9635	26.6357	81.4253	43.3052	58.6822	29.8081
Usp35	48.6067	9.14e-06	0.00144269	0.0231672	0.428885	59.676	53.2516	43.2229	21.3371	22.5046	30.2616	39.2388	84.1342	58.618	56.7456	59.2833	56.838	26.2526	69.1294
Tomt	45.7139	8.94e-06	0.00144267	0.0230631	0.428885	37.3795	43.8543	42.4225	39.118	37.0664	43.3157	24.6644	49.5674	70.3416	39.3745	66.4259	60.8979	49.4166	36.1503
1500011B03Rik	24.6738	8.82e-06	0.00144269	0.0235836	0.428885	26.887	22.9713	23.2123	12.4466	18.5332	12.4607	19.0588	26.7403	43.9635	18.5292	43.5697	27.0657	27.7968	22.1975
Srcrb4d	100.204	8.39e-06	0.00144268	0.0234099	0.428885	118.04	111.724	95.2504	62.2332	50.3043	64.6768	57.1765	78.2644	180.25	119.282	170.707	124.502	77.2134	93.2296
Rnf32	12.2702	7.9e-06	0.00144269	0.0217862	0.428885	6.5578	14.6181	12.0064	7.11236	5.29519	7.71375	11.2111	11.7397	16.1199	12.7388	17.1422	18.946	18.5312	12.0501
Cldn3	2214.84	7.3e-06	0.00144267	0.0216024	0.428885	2532.62	1999.55	2005.86	1566.5	1985.7	1311.93	1415.96	2125.53	3421.83	3265.77	2854.17	3158.57	1192.17	2171.55
Stim1	1049.63	7.23e-06	0.00144254	0.0234328	0.428885	1058.43	1014.91	1047.75	919.273	954.459	833.678	966.395	1168.1	1109.35	1263.46	1224.24	1128.64	860.157	1146.03
Btla	26.3054	7.1e-06	0.00144269	0.0233685	0.428885	27.5428	22.9713	16.8089	10.6685	19.857	19.5811	19.0588	16.9573	60.0834	15.055	45.7124	18.946	40.151	34.8818
Lrrfip2	425.215	6.59e-06	0.00144266	0.02372	0.428885	409.207	398.865	427.426	691.677	545.405	466.978	469.744	476.76	240.334	303.415	278.56	335.615	491.077	417.948
Apcs	6741.37	6.47e-06	0.00144269	0.0227459	0.428885	7594.59	5459.86	4643.26	3950.92	5039.7	5160.5	2349.84	2761.43	15026.7	7681.51	16512.2	9071.08	5982.49	3145.07
Ikzf3	17.9009	6.18e-06	0.00144269	0.0233697	0.428885	17.0503	14.6181	12.8068	12.4466	13.238	14.8341	7.84775	32.6102	30.7744	4.6323	27.856	12.1796	26.2526	23.466
Sectm1a	18.5331	5.19e-06	0.00144269	0.0224072	0.428885	17.7061	28.192	20.811	5.33427	7.94279	6.52702	4.48443	28.0447	23.4472	23.1615	27.1418	13.5329	16.9869	36.1503
Rorc	1778.5	2e-06	0.00144267	0.0217095	0.428885	1545.02	1234.18	1628.86	1587.84	3866.81	2333.11	2755.68	1658.55	874.874	885.927	1634.22	1779.57	1670.9	1443.47
Moxd1	48.5416	-5.03e-07	0.00144269	0.0219955	0.428885	0.65578	1.04415	0	416.073	2.6476	232.599	2.24221	0	0	19.6873	0	0	4.6328	0
Erp27	5.11458	-3.1e-06	0.00144269	0.0218615	0.428885	1.31156	2.0883	3.2017	23.1152	14.5618	10.6806	0	0.652203	2.9309	2.31615	2.85703	1.35329	4.6328	1.90264
Gm3414	212.802	-3.3e-06	0.0014426	0.0225376	0.428885	207.882	221.36	247.331	195.59	244.903	272.355	237.675	161.094	183.181	225.824	199.992	184.047	236.273	161.725
Sacs	7.11392	-5.1e-06	0.00144269	0.0229991	0.428885	6.5578	3.13245	12.8068	16.0028	7.94279	10.6806	10.09	3.91322	2.9309	10.4227	0.714257	4.05986	4.6328	5.70793
Mefv	17.6946	-6.39e-06	0.00144269	0.023154	0.428885	39.3468	19.8388	16.8089	12.4466	30.4474	22.5479	14.5744	17.6095	19.0508	3.47422	12.1424	20.2993	7.72134	11.4159
Plaur	25.6085	-6.58e-06	0.00144269	0.0224054	0.428885	42.6257	15.6622	23.2123	65.7894	30.4474	30.855	19.0588	13.0441	20.5163	13.8969	19.2849	8.11972	40.151	15.8554
Igsf23	12.168	-7.61e-06	0.00144269	0.0236716	0.428885	28.1985	11.4856	16.0085	19.559	6.61899	17.2076	10.09	4.56542	8.7927	6.94845	15.7137	9.47301	6.17707	9.51322
Osgin1	2413.73	-8.12e-06	0.00144269	0.0221335	0.428885	2579.84	1399.16	3113.65	3195.23	4892.76	3406.51	2103.2	1512.46	1525.53	2185.29	3449.15	2197.74	891.042	1340.73
Pde6g	12.4447	-8.54e-06	0.00144269	0.0215172	0.428885	15.0829	17.7505	16.8089	16.0028	9.26659	20.1744	12.3322	12.3919	11.7236	9.26459	9.9996	10.8263	3.08854	9.51322
Ell	1003.89	-1.05e-05	0.00144265	0.0233654	0.428885	924.65	721.507	987.723	1182.43	1429.7	1195.04	1451.83	962.652	788.412	890.559	781.397	778.14	1090.25	870.143
Zfp750	364.426	-1.06e-05	0.00144267	0.0230217	0.428885	376.418	358.143	329.775	385.846	546.729	488.34	431.626	428.497	205.163	368.268	242.847	281.484	265.614	393.213
Gm10012	129.188	-1.07e-05	0.00144268	0.0223002	0.428885	92.465	167.064	182.497	156.472	162.827	157.835	136.775	74.3511	169.992	89.1717	77.854	90.6702	160.604	90.0585
Chml	140.379	-1.26e-05	0.00144267	0.0222259	0.428885	162.633	150.357	147.278	138.691	184.008	211.238	108.747	102.396	127.494	149.392	108.567	106.91	155.971	111.622
Mlxipl	5390.15	-1.26e-05	0.00144268	0.0224377	0.428885	4791.78	5284.44	4958.63	5341.38	6525	7847.85	8542.84	6844.22	3160.98	3767.22	4314.83	4691.85	4035.17	5355.95
Atp11b	888.011	-1.27e-05	0.00144268	0.0237024	0.428885	887.926	848.893	893.273	1301.56	1164.94	1058.56	949.578	795.688	499.718	772.435	507.122	703.709	1130.4	918.343
Rab17	684.263	-1.28e-05	0.00144269	0.0233166	0.428885	654.468	711.065	594.715	417.851	644.69	520.975	473.107	580.461	1132.79	705.267	1163.52	893.169	525.051	562.549
Hspa8	8381.98	-1.3e-05	0.00144268	0.0215552	0.428885	7870.67	6506.09	8689.4	10177.8	15054.2	11113.1	7728.91	6248.76	5206.74	8016.19	8261.1	8112.95	7999.31	6362.44
Npm1	583.47	-1.35e-05	0.00144268	0.0229537	0.428885	503.639	657.814	546.689	937.054	812.812	652.702	528.042	484.587	587.645	442.384	339.272	594.093	609.986	471.856
Kmo	7099.91	-1.44e-05	0.00144264	0.0237402	0.428885	5745.94	7171.22	6641.92	9610.58	8955.5	8728.99	7925.11	5803.3	5769.48	5952.5	6300.46	6848.98	8107.41	5837.31
Slc5a3	241.495	-1.47e-05	0.00144269	0.0228518	0.428885	228.211	241.198	304.961	254.267	312.416	378.567	229.827	232.184	156.803	189.924	143.566	148.862	327.385	232.757
Dnm1l	1164.25	-1.51e-05	0.00144267	0.022115	0.428885	931.863	1178.84	1106.19	1578.94	1536.93	1582.5	1230.98	954.173	1024.35	957.727	784.968	1036.62	1423.81	971.617
Smarca5-ps	227.195	-1.52e-05	0.00144268	0.0237903	0.428885	216.407	222.404	209.711	318.278	321.683	249.807	247.765	193.704	155.338	236.247	157.851	185.4	273.335	192.801
Pak4	308.372	-1.54e-05	0.00144262	0.0237034	0.428885	293.789	268.346	275.346	288.051	260.788	256.334	327.363	425.236	263.781	327.735	317.13	351.855	298.044	363.405
Rbm15	536.056	-1.56e-05	0.00144269	0.0229301	0.428885	491.835	453.161	502.666	579.658	726.765	682.37	828.498	482.63	386.879	385.639	427.126	430.345	704.186	423.021
Abcb7	1988.31	-1.69e-05	0.00144268	0.022732	0.428885	1676.83	2265.8	2025.87	2432.43	2451.67	2601.31	2089.74	1721.16	1626.65	1520.55	1249.24	1851.3	2501.71	1822.1
Slc25a44	2234.09	-1.72e-05	0.00144267	0.0237518	0.428885	2202.76	1791.76	2435.69	2347.08	2696.58	2749.65	3114.44	2025.09	1710.18	1865.66	1597.08	2046.17	2623.71	2071.35
Ralgapa2	1750.89	-1.73e-05	0.00144268	0.0237657	0.428885	1493.21	1509.84	1843.38	2041.25	2382.84	1982.43	2474.28	1685.29	1216.32	1563.4	1143.53	1565.75	1922.61	1688.28
Ppip5k2	1270.78	-1.88e-05	0.00144273	0.021984	0.428885	929.24	1180.93	1055.76	2195.94	2084.98	1775.35	1464.17	940.477	948.146	785.174	602.119	829.565	1941.14	1057.87
Usp6nl	539.857	-1.92e-05	0.00144265	0.0238105	0.428885	544.953	605.606	697.169	407.183	659.252	596.925	622.215	513.936	460.151	525.766	529.264	426.285	430.851	538.448
Kat2b	2666.03	-1.94e-05	0.00144266	0.023237	0.428885	2283.43	2825.47	2602.18	3525.95	2866.02	3582.15	2746.71	2053.14	2445.84	2379.84	2359.19	2448.1	2994.34	2212.14
Gstp2	879.07	-2.02e-05	0.00144275	0.023114	0.428885	678.076	691.227	528.28	2131.93	1609.74	1284.04	776.927	391.322	552.475	1299.36	659.259	610.332	688.743	405.263
Zfp131	491.157	-2.12e-05	0.00144265	0.0225757	0.428885	449.865	487.618	509.87	588.548	579.824	608.199	515.709	425.236	452.824	430.804	366.414	419.519	566.746	475.027
Snx13	1248.52	-2.16e-05	0.00144263	0.0226141	0.428885	1194.83	1224.79	1397.54	1303.34	1456.18	1549.28	1294.88	971.783	1173.83	1095.54	1197.09	1088.04	1433.08	1099.09
Ipo7	1322.69	-2.23e-05	0.00144265	0.0232202	0.428885	1277.46	1439.88	1412.75	1301.56	1556.79	1561.74	1469.77	1149.83	1012.63	1308.62	1009.96	1192.25	1507.21	1317.26
Snip1	424.718	-2.27e-05	0.00144267	0.0225189	0.428885	425.601	379.026	437.832	563.655	481.863	501.394	454.048	343.059	466.013	384.481	419.983	364.034	409.231	315.839
Gys2	2481.51	-2.38e-05	0.00144275	0.0223507	0.428885	2329.99	2384.84	2125.13	3483.28	3371.71	2614.37	3660.42	2534.46	1324.77	2035.89	1504.94	2038.05	2781.23	2552.08
Rbl2	968.96	-2.51e-05	0.00144266	0.0235553	0.428885	971.866	1006.56	1085.37	935.276	1033.89	987.36	1310.57	1007.65	842.634	850.026	757.827	821.445	949.725	1005.23
Zscan12	208.377	-2.51e-05	0.00144263	0.0236773	0.428885	234.113	227.624	242.528	224.039	211.808	224.885	198.436	196.313	175.854	215.402	185.707	213.819	171.414	195.338
Lrrc40	235.482	-2.51e-05	0.0014427	0.0232647	0.428885	224.277	234.934	236.125	272.048	259.464	296.683	278.035	206.748	211.025	196.873	169.279	202.993	274.88	233.391
Slc12a2	523.662	-3.01e-05	0.00144278	0.023405	0.428885	436.749	558.62	589.112	672.118	668.518	641.428	510.104	395.235	364.897	495.656	417.84	537.255	623.884	419.85
AI597479	367.554	-3.75e-05	0.00144284	0.0237038	0.428885	353.465	387.379	467.448	318.278	418.32	516.821	357.633	303.274	353.173	342.79	364.271	369.447	279.512	313.936
Cby1	152.585	1.13e-05	0.00144268	0.0239285	0.429158	143.616	161.843	162.486	104.907	86.0469	110.366	124.443	132.397	200.767	159.814	252.847	228.705	154.427	113.524
Ap5b1	102.746	1.1e-05	0.00144268	0.023965	0.429158	107.548	98.15	102.454	46.2304	78.1041	71.2038	97.5363	144.137	127.494	144.759	100.71	101.497	66.4035	152.212
Mvb12b	53.349	9.81e-06	0.00144269	0.0239939	0.429158	65.578	59.5165	40.0212	37.3399	25.1522	34.4152	42.6021	73.6989	51.2907	60.2199	60.7118	37.892	63.315	95.1322
Itpka	64.802	9.07e-06	0.00144269	0.0240395	0.429158	62.2991	76.2229	50.4267	37.3399	45.0091	48.0626	42.6021	43.0454	79.1343	104.227	118.567	97.4367	43.2395	59.6162
Zfp827	13.3671	6.87e-06	0.00144269	0.0239769	0.429158	16.3945	12.5298	10.4055	7.11236	6.61899	9.49384	6.72664	16.3051	7.32725	17.3711	17.1422	25.7124	9.26561	24.7344
AA388235	12.0792	-6.16e-06	0.00144269	0.0240758	0.429158	26.2312	15.6622	24.0127	8.89045	11.9142	8.90048	14.5744	10.4352	8.7927	5.79037	4.9998	4.05986	7.72134	17.1238
Pum2	2284.46	-9.88e-06	0.00144258	0.0240657	0.429158	1950.95	2361.87	2363.65	2551.56	2757.47	2699.22	2623.39	1969.65	1905.08	2020.84	1862.78	2092.18	2645.33	2178.53
Foxa2	990.936	-2.06e-05	0.00144275	0.0239783	0.429158	1551.58	654.681	1825.77	679.231	1315.86	967.185	1421.56	924.172	885.132	867.398	717.828	897.229	268.703	896.78
Zbtb44	2706.97	-2.46e-05	0.00144263	0.0240927	0.429158	2640.83	2917.35	3040.01	2231.5	3181.09	3373.87	2956.36	2575.55	2296.36	2397.21	2391.33	2655.15	2591.28	2649.75
Sumo3	1965.73	1.16e-05	0.00144268	0.0243907	0.432288	1830.28	1881.56	1732.12	1843.88	1523.69	1391.44	1418.2	1307.67	3427.69	2262.88	3146.3	2285.7	1982.84	1485.97
Tmem2	427.123	-1.1e-05	0.00144268	0.0244168	0.432288	430.192	288.185	401.813	629.444	687.051	589.805	457.412	409.584	304.814	317.312	251.418	267.951	531.228	413.508
Asun	345.392	-2.12e-05	0.00144267	0.024351	0.432288	320.676	342.481	360.991	332.503	436.853	472.912	371.087	309.796	291.625	326.577	279.989	308.549	392.244	289.202
Timm17a	238.814	-2.21e-05	0.0014426	0.0244178	0.432288	247.885	246.419	243.329	293.385	263.436	234.379	264.581	206.748	237.403	225.824	204.992	244.945	199.211	230.854
Psme4	2109.6	-4.15e-05	0.00144287	0.0243131	0.432288	1945.7	2143.64	1968.24	2638.69	2671.42	2520.62	2135.71	1717.25	1673.54	2013.89	1900.64	1993.39	2321.03	1890.59
Myo1b	4657.49	-1.22e-05	0.00144268	0.0245723	0.43449	3133.32	4916.9	4764.92	6543.37	6640.17	6701.47	4645.87	3657.55	3287	3764.9	3286.3	4329.16	6010.29	3523.7
Steap3	668.967	3.5e-05	0.00144287	0.0249178	0.435278	678.732	749.699	721.982	396.514	460.682	330.504	644.637	652.203	745.914	909.088	912.106	874.223	620.796	668.463
Psmd3	1742.24	2.49e-05	0.00144261	0.0248171	0.435278	1726.01	1514.02	1591.24	1733.64	1638.86	1335.07	1821.8	1765.51	2104.39	1854.08	2001.35	1887.84	1741.93	1675.6
Pde6d	195.25	1.06e-05	0.00144268	0.0246488	0.435278	177.716	167.064	173.692	147.582	142.97	175.043	146.865	124.571	316.537	276.78	343.558	236.825	159.06	145.235
Lama3	116.147	-5.7e-06	0.00144269	0.0248967	0.435278	41.3141	96.0617	77.6411	192.034	186.656	277.695	179.377	33.2624	74.7379	113.491	133.566	89.3169	97.2889	33.6134
Tsku	4139.86	-9.26e-06	0.00144269	0.0247905	0.435278	5313.78	4534.74	4598.44	5352.05	6923.46	4236.63	3565.12	4796.3	1875.78	1532.13	3034.16	5078.89	3049.93	4066.59
D930016D06Rik	462.499	-1.06e-05	0.00144266	0.0247119	0.435278	308.217	471.955	464.246	581.436	565.262	665.162	584.097	412.845	438.17	389.113	388.556	354.561	512.697	338.671
Ddhd2	936.181	-1.09e-05	0.00144268	0.0248785	0.435278	849.891	760.14	875.664	1104.19	1183.48	1211.06	1640.18	913.736	543.682	636.941	507.122	790.32	1088.71	1001.43
Tmem33	1950.04	-1.9e-05	0.00144266	0.0249171	0.435278	1647.98	1836.66	2041.88	2467.99	2433.14	2518.24	1995.57	1557.46	1910.95	1768.38	1516.37	1910.84	2081.67	1613.44
Mysm1	679.054	-2.63e-05	0.00144256	0.0247848	0.435278	623.647	658.858	731.587	720.127	730.737	830.118	738.81	637.202	649.194	641.573	627.118	619.805	662.491	635.483
Csde1	4070.2	-3.79e-05	0.00144281	0.0248853	0.435278	3560.23	4192.26	4116.58	4550.13	5136.34	4786.08	4492.28	3444.28	3602.08	3620.14	3190.59	3759.43	4688.4	3843.98
Fastkd1	419.096	-1.1e-05	0.00144266	0.0249897	0.436008	428.88	459.426	512.271	391.18	436.853	480.626	585.218	487.848	306.279	311.522	265.704	353.208	353.637	494.688
Cnpy3	873.771	2.18e-05	0.00144269	0.0250614	0.436206	964.652	856.202	722.783	995.731	651.309	687.71	635.668	910.475	940.819	1055.01	1051.39	982.486	988.331	790.232
Zkscan7	405.006	-1.65e-05	0.00144268	0.0250322	0.436206	417.076	537.737	526.679	277.382	361.397	558.357	480.955	377.626	404.464	332.367	386.413	350.501	313.486	345.647
Mllt1	560.69	2.42e-05	0.00144263	0.0251181	0.436568	562.003	476.132	513.072	554.764	512.31	456.891	566.159	534.154	608.162	682.106	687.115	585.973	569.835	540.985
Ppid	292.002	-1.55e-05	0.00144267	0.0251425	0.436568	238.704	256.861	301.76	400.07	345.511	424.849	306.062	239.359	265.246	258.251	208.563	284.19	290.322	268.273
Ythdf3	3780.95	-1.54e-05	0.00144267	0.0253118	0.438981	2971.99	3864.4	4114.98	4087.83	5051.61	5370.55	3961.99	2925.78	3502.43	3169.65	2952.02	3300.67	4605.01	3054.38
0610009O20Rik	751.081	2.34e-05	0.00144265	0.0254291	0.43996	727.26	777.891	686.764	661.45	612.919	591.585	787.017	772.861	830.91	767.803	962.818	826.858	668.668	840.335
Rfc3	37.8544	9.51e-06	0.00144268	0.0254224	0.43996	35.4121	51.1633	25.6136	33.7837	14.5618	33.2284	28.0277	51.524	39.5671	38.2164	43.5697	41.9519	43.2395	50.103
Ptk6	44.9491	5.51e-06	0.00144269	0.0254655	0.439991	37.3795	38.6335	47.225	1.77809	26.476	41.5356	23.5433	43.0454	101.116	49.7972	91.4249	64.9578	15.4427	46.9319
BC021767	65.0026	-7.19e-06	0.00144269	0.0256134	0.439991	38.691	56.384	46.4246	181.365	52.9519	97.3119	93.0519	55.4373	33.7053	66.0102	37.8556	41.9519	66.4035	42.4924
Crat	1618.69	-1.05e-05	0.00144268	0.0255907	0.439991	2074.23	1164.23	1555.22	999.287	1622.98	747.047	1250.03	2143.14	2085.34	1876.08	1740.64	2170.67	1013.04	2219.75
Mapk14	2559.85	-1.38e-05	0.0014426	0.0255993	0.439991	2831	2184.36	2902.34	2375.53	3380.98	2902.15	2840.89	2654.47	2127.83	2172.55	2158.48	2429.15	2228.38	2649.75
Rab3gap1	923.706	-1.44e-05	0.00144267	0.0256105	0.439991	736.441	776.847	852.451	1490.04	1195.39	1145.79	1068.42	804.166	690.227	802.545	739.256	821.445	1005.32	803.55
Atad2b	769.099	-1.93e-05	0.00144266	0.0255183	0.439991	647.255	701.668	812.43	885.489	974.316	963.032	898.007	727.859	682.9	720.322	552.835	664.464	803.019	733.787
Prkaa2	3358.51	3.06e-06	0.00144263	0.0256525	0.440139	3198.89	3550.11	4123.78	2830.72	3539.84	3735.83	5186.24	3024.27	2360.84	2782.85	2562.04	2854.08	3679.99	3589.66
Neu3	62.2547	-1.36e-05	0.00144268	0.0256887	0.440239	59.0202	63.6931	69.6369	56.8989	97.9611	80.1043	63.9031	45.6542	54.2216	59.0618	57.8548	39.2453	71.0363	53.2741
Ms4a1	12.8613	6.47e-06	0.00144269	0.0258094	0.441646	11.804	13.5739	12.0064	3.55618	1.3238	7.71375	10.09	9.13084	26.3781	13.8969	35.7128	10.8263	13.8984	10.1474
Smad1	438.042	-1.59e-06	0.00144265	0.0258319	0.441646	407.895	347.702	362.592	622.332	717.499	541.742	483.197	416.758	353.173	378.69	311.416	309.903	461.736	417.948
Jrk	57.3035	7.01e-06	0.00144269	0.0259631	0.442468	51.1508	62.6489	80.8428	12.4466	22.5046	35.0085	34.7543	87.3952	96.7197	74.1167	74.997	67.6643	27.7968	74.2031
Them6	171.618	4.28e-06	0.00144266	0.0259718	0.442468	211.161	184.814	176.093	97.795	86.0469	127.574	124.443	211.314	183.181	189.924	240.705	232.765	128.174	208.657
Zc3h8	80.4093	-1.26e-05	0.00144268	0.0259153	0.442468	77.382	73.0904	98.4521	87.1264	64.8661	115.113	127.806	91.9606	63.0143	56.7456	72.1399	63.6045	60.2264	74.2031
Lgr4	2421.8	-1.54e-05	0.00144267	0.0260407	0.4426	2095.22	2117.53	2475.71	2944.52	3326.71	3428.46	2505.68	1659.86	2035.51	2362.47	2166.34	2326.3	2676.22	1784.68
Nipa2	626.439	-2.52e-05	0.00144267	0.0260177	0.4426	594.137	616.048	669.955	716.571	714.851	750.014	667.059	505.457	581.784	557.034	530.693	561.614	758.235	546.693
Isg15	225.988	1.01e-05	0.00144268	0.026099	0.44307	209.194	275.655	210.511	142.247	99.2849	220.732	146.865	253.707	315.072	274.464	393.556	255.771	182.224	184.557
Cybasc3	453.246	1.31e-05	0.00144262	0.0261329	0.443125	491.835	460.47	441.034	314.722	387.873	419.509	362.118	458.499	493.857	548.927	569.263	526.429	398.421	472.49
Pdhb	2184.12	3.68e-05	0.0014429	0.0263483	0.443777	1509.61	1758.35	1882.6	3204.12	3296.26	3143.65	3125.65	1316.8	1932.93	1623.62	1823.5	1720.03	2923.3	1317.26
Ttc7	1719	1.43e-05	0.00144268	0.0263236	0.443777	1840.12	1696.74	1772.14	913.939	1285.41	1335.66	1596.46	2440.54	1524.07	1930.51	1984.92	2172.03	1365.13	2208.34
Akr1c14	19721.9	-8.41e-06	0.00144269	0.026282	0.443777	11976.5	18129.6	19443.1	26303.3	30729.3	39121.2	20715.8	8897.35	13508.5	15820.5	21159.9	16307.1	24768.5	9226.56
Id2	5286.86	-9.38e-06	0.00144269	0.0263013	0.443777	6369.59	2153.04	7391.11	6198.42	5958.42	7097.83	10215.5	2736.64	5728.44	7412.83	4261.26	3027.3	2588.19	2877.43
2410016O06Rik	287.241	-1.23e-05	0.00144262	0.0263554	0.443777	330.513	296.538	290.554	314.722	349.483	302.023	313.91	215.879	361.966	255.934	268.561	272.011	203.843	245.441
Zfp644	697.2	-1.48e-05	0.00144261	0.0263279	0.443777	592.825	652.593	776.411	773.469	815.46	834.271	838.588	595.461	605.231	683.264	535.693	672.584	730.439	654.51
Ntmt1	199.903	1.44e-05	0.00144267	0.0265322	0.444195	176.405	142.004	164.087	220.483	198.57	143.001	183.862	169.573	279.901	202.663	291.417	243.592	213.109	169.97
Cep78	76.9766	1.04e-05	0.00144267	0.0265338	0.444195	64.2664	88.7527	84.8449	39.118	38.3901	64.0834	75.1142	75.6556	95.2542	96.1202	84.9966	113.676	78.7577	78.6427
Zfp248	11.0073	7.24e-06	0.00144269	0.0264811	0.444195	11.1483	14.6181	8.80466	3.55618	2.6476	8.90048	6.72664	13.6963	13.189	12.7388	11.4281	12.1796	15.4427	19.0264
Gulp1	29.2628	-4.04e-06	0.00144269	0.0265217	0.444195	15.7387	25.0596	18.4097	103.129	5.29519	96.7185	20.1799	10.4352	33.7053	16.213	7.14257	12.1796	30.8854	14.5869
1700001J11Rik	148.037	-8.35e-05	0.0014438	0.026516	0.444195	140.337	143.048	172.091	149.36	180.037	163.175	180.498	133.702	136.287	154.024	117.852	148.862	111.187	142.064
Pias4	284.391	1.2e-05	0.0014426	0.0265712	0.444307	276.083	243.287	257.736	257.823	246.226	261.674	276.914	326.102	360.501	345.106	302.845	336.968	227.007	263.199
Mir1948	24.1709	-5.74e-06	0.00144269	0.0266113	0.444464	11.1483	28.192	32.017	19.559	26.476	23.7346	79.5986	21.5227	8.7927	22.0034	24.2847	20.2993	6.17707	14.5869
Mbd1	847.638	-8.71e-06	0.00144269	0.0266553	0.444685	607.908	746.567	733.989	1260.67	1126.55	1135.11	1522.46	660.682	446.962	546.611	544.264	526.429	1417.64	591.088
Paqr7	3018.18	6.39e-06	0.00144268	0.0266942	0.444821	3966.81	3465.53	2959.97	1177.1	1746.09	1553.43	2094.23	3609.29	4053.43	4078.74	3805.56	4024.68	1851.58	3868.08
Rassf5	272.785	1.24e-05	0.00144268	0.0267335	0.444963	321.332	286.097	280.148	190.256	187.979	180.976	193.952	360.668	254.988	415.749	247.133	309.903	237.817	351.989
Mrps26	570.752	1.13e-05	0.00144268	0.0267919	0.445423	517.41	526.251	487.458	448.079	492.453	475.285	417.052	448.063	989.179	656.628	966.39	691.53	515.785	358.966
2021-03-08	4982.58	-3e-05	0.0014426	0.0268613	0.446065	5337.39	5115.29	5456.49	4541.24	5603.64	5688	5169.43	4026.05	4671.85	4648.51	4872.66	4843.41	5241.24	4540.98
Tacc2	1221.8	-8.02e-06	0.0014427	0.0269295	0.446684	1131.88	729.86	709.976	2206.61	3255.22	1674.48	1271.34	1453.11	533.424	514.185	317.13	636.045	1409.92	1262.09
Carhsp1	2329.6	2.48e-05	0.00144264	0.0270242	0.44679	2326.71	2410.94	2224.38	1886.55	2074.39	1864.35	2331.9	2388.37	2469.28	2435.43	2957.02	2691.69	2135.72	2417.63
Adam8	16.1752	-3.44e-06	0.00144269	0.0270215	0.44679	43.9373	13.5739	4.00212	51.5646	13.238	10.6806	28.0277	8.47864	2.9309	2.31615	1.42851	1.35329	27.7968	17.1238
Arhgap29	1852.99	-8.66e-06	0.00144265	0.0270533	0.44679	1800.77	1476.43	2455.7	1655.4	2041.3	2398.38	2759.05	1353.97	1768.8	1818.18	2154.2	1498.09	1332.7	1428.89
Pwwp2a	400.38	-2e-05	0.00144265	0.0270595	0.44679	346.908	408.262	386.605	400.07	505.691	530.468	474.228	411.54	372.224	362.477	377.842	355.914	313.486	359.6
Spsb3	564.328	0.000313492	0.0014604	0.0273552	0.447919	567.905	527.295	526.679	416.073	430.234	431.376	445.08	444.15	970.128	735.377	897.107	646.871	435.483	426.827
Fmo1	5454.12	0.000202599	0.00144987	0.0279551	0.447919	5928.25	4631.85	6549.07	4399	8661.61	5637.56	7085.4	5358.5	3654.83	3840.17	4513.39	5460.51	5264.41	5373.07
Nicn1	391.995	6.57e-05	0.00144338	0.0279728	0.447919	426.257	403.042	416.22	250.711	272.702	272.355	387.903	408.931	423.515	409.958	512.122	475.004	356.726	472.49
Mlh1	185.723	2.06e-05	0.00144262	0.0273456	0.447919	160.666	180.638	176.894	170.697	152.237	190.47	170.408	224.358	194.905	214.244	195.706	207.053	165.237	196.607
Actr5	177.519	1.98e-05	0.00144263	0.0281218	0.447919	148.862	157.667	170.49	142.247	182.684	159.022	181.619	178.704	199.301	187.608	220.705	209.759	154.427	192.167
Asic1	75.3487	1.97e-05	0.00144273	0.0277766	0.447919	82.6283	75.1787	80.0424	48.0085	51.6281	55.7763	44.8443	105.005	102.581	86.8556	80.711	112.323	38.6067	90.6927
Pex11c	875.862	1.74e-05	0.00144266	0.0281305	0.447919	734.474	843.672	734.789	825.034	745.298	830.118	808.318	742.207	1207.53	885.927	1231.38	959.48	977.521	736.324
Tspan9	973.165	1.74e-05	0.00144267	0.0276868	0.447919	981.047	960.617	870.061	954.835	730.737	776.122	836.346	799.601	1236.84	1149.97	1417.8	1055.56	960.535	894.243
Btbd6	399	1.7e-05	0.00144268	0.0274887	0.447919	405.272	355.011	377	371.621	356.102	277.695	340.817	365.886	529.027	479.443	571.406	473.65	319.663	363.405
Nudt16	292.573	1.63e-05	0.00144268	0.0282359	0.447919	273.46	316.377	264.14	192.034	242.255	260.487	255.612	277.838	389.81	341.632	408.555	385.687	233.184	254.954
D730039F16Rik	1065.85	1.63e-05	0.00144267	0.0283666	0.447919	1024.33	1148.56	1053.36	718.349	783.689	983.799	917.066	1135.49	1455.19	987.837	1428.51	1297.8	843.17	1144.76
Wdr25	144.297	1.43e-05	0.00144267	0.0271929	0.447919	142.304	140.96	144.076	103.129	104.58	112.739	133.412	111.527	186.112	196.873	186.421	175.927	159.06	123.038
Rasgrp4	45.2694	1.26e-05	0.00144268	0.028191	0.447919	35.4121	41.766	40.0212	51.5646	31.7712	36.7886	40.3599	72.3945	46.8944	47.481	58.5691	44.6585	41.6952	44.395
Vmac	508.021	1.25e-05	0.00144268	0.0272313	0.447919	546.92	593.077	480.254	291.607	349.483	402.895	409.204	457.194	606.696	528.082	750.684	722.655	461.736	511.811
Gtpbp3	279.175	1.22e-05	0.00144269	0.0281573	0.447919	276.739	269.39	229.722	238.264	195.922	220.138	192.83	210.009	552.475	375.216	409.269	326.142	210.02	202.315
Zc3h6	296.697	1.09e-05	0.00144268	0.0279888	0.447919	268.87	262.081	254.535	247.155	211.808	233.786	264.581	186.53	457.22	382.164	533.55	361.328	276.424	213.73
Mvd	73.5137	8.43e-06	0.00144269	0.0280954	0.447919	72.1358	44.8984	45.6242	55.1208	42.3615	75.9507	72.872	96.526	48.3598	44.0068	124.281	71.7242	152.883	82.4479
H2-M3	60.4631	8.26e-06	0.00144269	0.0279206	0.447919	65.578	67.8697	60.8322	24.8933	26.476	53.9962	34.7543	45.6542	104.047	86.8556	90.7106	75.7841	49.4166	59.6162
Cdca3	21.7203	7.94e-06	0.00144269	0.0276659	0.447919	19.0176	14.6181	25.6136	8.89045	13.238	18.3943	16.8166	20.2183	32.2399	25.4776	30.713	41.9519	7.72134	29.1739
Sac3d1	233.179	7.93e-06	0.00144267	0.0281457	0.447919	254.443	224.492	243.329	136.913	191.951	164.956	161.439	185.878	366.362	253.618	309.273	368.094	186.856	216.902
Hunk	65.8773	7.49e-06	0.00144269	0.0276771	0.447919	62.9549	85.6202	48.0254	37.3399	34.4188	27.8882	35.8754	137.615	45.4289	96.1202	24.2847	79.8439	43.2395	163.627
2900008C10Rik	11.3336	6.9e-06	0.00144269	0.0283113	0.447919	10.4925	7.30904	10.4055	5.33427	9.26659	5.34029	11.2111	11.7397	20.5163	16.213	21.4277	12.1796	7.72134	9.51322
Tssk6	7.72853	6.56e-06	0.00144269	0.0274461	0.447919	8.52514	2.0883	7.20381	3.55618	3.97139	7.71375	2.24221	8.47864	10.2581	12.7388	6.42831	18.946	4.6328	11.4159
Zfp324	240.103	6.51e-06	0.00144269	0.0278765	0.447919	240.671	251.64	284.15	76.4579	86.0469	141.221	186.104	254.359	388.344	396.061	351.414	330.202	84.9347	289.836
Serpina3c	8.4466	-2.48e-06	0.00144269	0.0282622	0.447919	5.90202	5.22075	3.2017	37.3399	10.5904	17.2076	3.36332	3.26102	8.7927	5.79037	4.9998	5.41315	4.6328	2.53686
Grem2	588.438	-5.33e-06	0.00144269	0.0278576	0.447919	302.97	420.792	401.813	1872.33	857.821	821.217	600.914	200.226	378.086	398.378	390.699	359.974	937.37	295.544
Arid5a	97.3415	-5.36e-06	0.00144269	0.0280959	0.447919	61.6433	42.8101	64.8343	373.399	174.741	69.4237	104.263	64.5681	60.0834	50.9553	67.1401	44.6585	129.718	54.5425
Tctex1d4	14.1629	-5.67e-06	0.00144269	0.0276857	0.447919	25.5754	3.13245	24.0127	8.89045	22.5046	17.801	29.1488	16.9573	11.7236	10.4227	4.9998	2.70657	7.72134	12.6843
Gpr52	8.29258	-5.83e-06	0.00144269	0.0276156	0.447919	9.8367	8.35319	8.80466	16.0028	17.2094	6.52702	10.09	4.56542	5.8618	6.94845	7.85683	2.70657	3.08854	8.24479
Gata6	349.109	-9.23e-06	0.00144269	0.0283443	0.447919	339.694	250.596	248.131	666.784	775.746	398.741	274.671	234.141	241.799	265.199	191.421	262.538	457.103	280.957
Ap3m1	3537.65	-1.07e-05	0.00144269	0.02833	0.447919	2894.61	3383.04	3092.84	5908.6	4857.02	5474.98	3400.32	2340.1	2508.85	2767.8	2371.33	2767.47	5425.01	2335.18
Slc16a10	4071.47	-1.09e-05	0.00144267	0.0283546	0.447919	3202.17	3325.61	3809.22	6356.67	6444.25	4881.62	4439.59	3448.2	3273.82	2684.42	3114.16	3863.63	4722.37	3434.91
Bcor	427.529	-1.2e-05	0.00144268	0.0273265	0.447919	453.144	365.452	429.027	536.983	733.384	405.862	514.588	472.847	281.366	491.023	254.99	342.382	282.601	421.753
Il17ra	568.736	-1.28e-05	0.00144268	0.0275434	0.447919	654.468	420.792	513.872	810.809	900.183	566.07	713.024	672.421	350.243	412.274	402.127	415.459	495.71	634.849
Itch	2436.14	-1.94e-05	0.00144271	0.027191	0.447919	1809.95	2290.86	2319.63	3291.25	3120.19	3624.87	2760.17	1683.34	2121.97	1999.99	2150.63	2264.05	2883.15	1785.95
1110051M20Rik	28.003	-2.05e-05	0.00144273	0.0278342	0.447919	24.2639	29.2362	31.2165	44.4523	31.7712	37.9754	30.2699	27.3925	21.9817	19.6873	23.5705	29.7723	16.9869	23.466
Tnpo3	930.454	-2.31e-05	0.00144263	0.02821	0.447919	867.597	897.968	957.307	1022.4	1159.65	1071.62	1029.18	980.913	772.292	946.147	717.114	863.397	847.803	892.975
Kpna1	1284.31	-3.72e-05	0.00144274	0.0282832	0.447919	1191.55	1290.57	1432.76	1530.94	1372.78	1463.83	1306.09	1132.88	1140.12	1280.83	1030.67	1155.71	1341.97	1309.65
Bag3	899.314	-4.01e-05	0.00144293	0.0277231	0.447919	1128.6	767.45	956.507	878.377	1446.91	954.725	1066.17	1032.44	536.355	828.023	499.266	756.487	721.173	1017.91
Clec4e	8.31992	-1.76539	0.433691	0.0277847	0.447919	77.382	10.4415	9.60509	17.7809	13.238	8.90048	7.84775	5.21762	5.8618	1.15807	2.14277	2.70657	15.4427	7.61058
Itpk1	425.89	1.86e-05	0.00144269	0.0285791	0.448597	516.099	420.792	413.819	296.941	326.978	299.649	367.723	563.503	366.362	484.075	488.552	506.129	386.067	525.764
Bnip1	316.355	1.73e-05	0.00144264	0.0285186	0.448597	301.003	333.084	246.531	320.056	266.083	249.807	297.093	320.232	404.464	343.948	405.698	362.681	301.132	277.152
Tmem110	532.957	1.67e-05	0.00144266	0.0286148	0.448597	592.169	517.898	481.855	432.076	456.71	436.717	423.779	493.065	709.278	575.563	747.113	618.452	426.218	550.499
Irf7	843.496	1.56e-05	0.00144267	0.0285796	0.448597	859.072	904.233	654.747	686.343	649.985	796.296	680.512	763.078	1140.12	851.185	1340.66	902.642	786.032	794.037
Vma21	1388.17	-5.66e-06	0.0014426	0.0285523	0.448597	1117.45	1541.16	1658.48	1408.25	1540.9	1745.09	1598.7	1218.97	1521.14	1061.95	1047.81	1282.92	1451.61	1239.89
2610203C22Rik	38.9844	-1.06e-05	0.00144268	0.0286266	0.448597	34.1006	43.8543	42.4225	37.3399	39.7139	46.2825	72.872	40.4366	43.9635	24.3196	27.856	32.4789	27.7968	32.345
Ppan	186.577	-1.35e-05	0.00144267	0.0285501	0.448597	170.503	156.622	231.322	273.826	202.541	177.416	262.339	176.747	194.905	137.811	204.992	154.275	123.541	145.235
Zbtb41	1236.53	-3.08e-05	0.00144278	0.0286654	0.448719	1060.4	1247.76	1550.42	1100.64	1542.22	1745.09	1294.88	966.565	1170.89	1137.23	1003.53	998.726	1423.81	1069.29
Pde9a	110.226	1.1e-05	0.00144268	0.028778	0.449658	115.417	127.386	105.656	83.5703	80.7517	77.1375	63.9031	142.18	131.89	170.237	107.139	138.035	67.9478	131.917
Fmn2	31.2295	-6.2e-06	0.00144269	0.0287876	0.449658	24.2639	38.6335	20.811	72.9017	26.476	66.4569	25.7855	18.9139	20.5163	32.4261	9.9996	20.2993	43.2395	16.4896
Stx5a	956.194	1.83e-05	0.00144266	0.0288629	0.450348	865.63	896.924	838.844	926.385	905.478	891.828	738.81	884.387	1128.4	1386.21	1157.81	1070.45	878.688	816.869
Gprasp2	7.98749	7.44e-06	0.00144269	0.0289103	0.450602	3.93468	9.39734	4.80254	3.55618	5.29519	4.74692	10.09	11.7397	10.2581	10.4227	12.1424	9.47301	7.72134	8.24479
Pdgfa	137.539	8.3e-05	0.00144385	0.0291466	0.451185	148.862	114.856	143.276	108.464	91.3421	97.9053	126.685	221.749	115.771	148.233	115.71	166.454	132.807	193.436
Mzt2	367.371	4.77e-05	0.00144302	0.0293175	0.451185	296.413	341.437	312.165	339.615	369.34	289.562	330.727	285.013	534.889	436.594	469.981	481.77	347.46	308.228
Pacsin3	990.363	1.63e-05	0.00144263	0.0292917	0.451185	904.976	1024.31	909.282	949.5	859.145	799.263	896.886	1216.36	1220.72	1023.74	1236.38	1094.81	775.222	954.493
Parp3	882.215	1.45e-05	0.00144265	0.0293764	0.451185	994.818	945.999	775.611	638.335	612.919	724.499	856.526	1147.88	992.11	941.514	1066.39	901.289	753.603	999.523
2010107G23Rik	75.9102	8.61e-06	0.00144269	0.0293483	0.451185	79.3494	109.636	68.8365	30.2275	39.7139	46.8758	50.4498	81.5254	109.909	47.481	102.139	89.3169	98.8331	108.451
Rnu11	6.50445	1.33e-06	0.00144269	0.0290739	0.451185	0	0	0	5.33427	1.3238	1.7801	2.24221	0.652203	8.7927	1.15807	4.28554	0	64.8592	0.634215
Zfp599	9.79961	-6.43e-06	0.00144269	0.0290797	0.451185	13.1156	13.5739	15.2081	17.7809	7.94279	10.6806	7.84775	11.0875	10.2581	6.94845	3.57128	9.47301	4.6328	5.07372
A130049A11Rik	8.68397	-6.53e-06	0.00144269	0.0293759	0.451185	9.8367	13.5739	14.4076	8.89045	7.94279	14.2408	7.84775	5.21762	10.2581	2.31615	6.42831	10.8263	1.54427	8.24479
Uchl3	77.4592	-1.08e-05	0.00144268	0.0293844	0.451185	73.4474	85.6202	76.0403	117.354	113.847	83.0711	75.1142	50.8718	82.0652	74.1167	52.855	48.7183	105.01	46.2977
Hsp90aa1	2512.18	-1.16e-05	0.00144268	0.0291555	0.451185	2265.06	2198.98	2274.8	3664.65	4233.51	3791.6	1856.55	1764.21	2249.47	2204.97	1884.21	2117.89	2992.79	1671.79
Slc37a4	4484.04	-1.91e-05	0.00144269	0.0293088	0.451185	3812.7	3847.69	4153.4	5960.16	6487.94	4742.77	5823.03	3819.3	3679.74	3449.9	3637	4758.16	4540.15	4064.68
Mcl1	4072.44	-1.92e-05	0.00144265	0.0293499	0.451185	4153.05	3697.33	3913.27	4713.72	5636.73	4775.4	4144.73	3703.86	3351.48	3387.37	3734.14	3235.71	4696.12	3871.25
Cul3	1275.73	-3.8e-05	0.00144285	0.0291265	0.451185	1108.92	1224.79	1355.12	1502.49	1562.08	1502.99	1507.89	1301.8	882.201	1145.34	958.533	1174.65	1371.31	1262.09
Aste1	81.4623	-4.25e-05	0.00144293	0.0292475	0.451185	83.2841	63.6931	102.454	99.5731	92.6659	91.3782	102.021	83.482	79.1343	71.8006	77.1397	66.3111	57.1379	70.3979
Gm8615	223.016	1.14e-05	0.00144268	0.0295166	0.451335	242.639	232.845	249.732	124.466	127.085	163.769	187.225	315.014	271.108	220.034	287.131	244.945	157.515	298.715
AW011738	97.7297	8.54e-06	0.00144269	0.0294463	0.451335	97.0554	117.989	113.66	62.2332	54.2757	65.2702	39.2388	112.179	146.545	157.498	129.28	121.796	61.7707	89.4243
Mfsd9	111.76	6.75e-06	0.00144269	0.029519	0.451335	120.008	134.695	133.671	21.3371	66.1899	48.0626	78.4775	142.18	148.01	119.282	144.994	150.215	81.8462	175.678
Rps6kb1	1175.93	-2.32e-05	0.00144261	0.0294875	0.451335	991.539	1317.72	1198.23	1235.77	1432.35	1429.42	1197.34	1080.05	1138.65	1068.9	1075.67	1159.77	1141.21	996.352
Tmem88b	85.17	-1.07e-05	0.00144268	0.0296033	0.452146	82.6283	121.121	137.673	92.4607	78.1041	102.652	75.1142	90.004	83.5306	42.8487	58.5691	97.4367	50.9608	79.2769
Whamm	1103.48	2.54e-05	0.00144257	0.0297194	0.452885	998.097	1124.55	950.904	1017.07	959.754	1044.32	1169.32	1213.75	1106.41	1237.98	1316.38	1108.34	1145.85	1055.97
U2surp	870.701	-1.65e-05	0.00144265	0.0297457	0.452885	758.737	887.527	950.103	912.161	962.401	1125.02	1091.96	898.084	779.619	700.635	552.835	798.439	914.206	858.093
Zfp623	463.159	-1.83e-05	0.00144265	0.0297063	0.452885	486.589	413.483	503.467	634.778	549.376	459.265	496.651	380.234	502.649	389.113	415.698	507.483	335.106	410.337
Cdc42se2	359.992	2.01e-05	0.00144264	0.0298162	0.453482	414.453	345.613	319.369	327.169	316.388	293.122	295.972	372.408	445.497	435.436	384.27	355.914	325.84	408.434
Snx21	291.618	1.6e-05	0.00144266	0.0298515	0.453542	296.413	301.759	284.15	213.371	252.845	232.599	245.523	248.489	301.883	314.996	442.839	353.208	296.499	298.081
1810010H24Rik	95.481	1.44e-05	0.00144268	0.0300916	0.454801	104.269	102.327	72.8386	72.9017	58.2471	75.3574	99.7786	108.918	111.374	76.4329	107.853	112.323	103.466	130.648
Bank1	23.8931	8.52e-06	0.00144269	0.0300382	0.454801	22.2965	24.0154	19.2102	8.89045	18.5332	14.2408	25.7855	26.0881	46.8944	30.1099	22.142	14.8862	27.7968	33.6134
A930019D19Rik	22.9215	-7.42e-06	0.00144269	0.0299821	0.454801	24.2639	18.7947	29.6157	8.89045	45.0091	34.4152	34.7543	20.8705	13.189	13.8969	14.2851	10.8263	32.4296	19.6607
Uqcrb	663.759	-8.31e-06	0.00144268	0.0300784	0.454801	656.436	740.302	682.762	969.059	1025.94	794.516	593.066	247.837	697.554	692.528	495.694	522.369	830.816	343.744
Arhgap42	1998.85	-1.54e-05	0.00144268	0.0300586	0.454801	1503.7	1843.97	2180.35	2558.67	2335.18	2991.15	2241.09	1451.15	1677.94	1929.35	2022.06	1610.41	2239.19	1399.71
Il2ra	14.8601	-7.41e-06	0.00144269	0.0301779	0.455154	11.804	24.0154	12.0064	17.7809	19.857	35.0085	11.2111	6.52203	17.5854	9.26459	9.9996	21.6526	3.08854	8.24479
Ext2	598.519	-2.43e-05	0.00144265	0.0301469	0.455154	621.024	573.238	589.112	595.66	459.358	460.451	578.491	654.16	574.456	693.686	682.83	695.589	557.481	643.728
Rap1a	885.844	-1.37e-05	0.0014427	0.0302426	0.455655	589.546	1119.33	1096.58	942.388	1215.25	1361.77	893.523	597.418	1021.42	548.927	511.408	756.487	1167.47	580.307
Rcan1	1482.47	-1.11e-05	0.00144271	0.0303662	0.457041	1383.7	783.112	1099.78	4171.4	1855.97	1579.54	2284.82	702.423	926.164	794.439	1029.96	668.524	2722.54	752.179
4921511C10Rik	4.6996	4.34e-06	0.00144269	0.0304417	0.457701	1.96734	3.13245	3.2017	1.77809	2.6476	4.74692	2.24221	5.21762	1.46545	6.94845	12.1424	5.41315	12.3541	2.53686
1110054M08Rik	222.591	1.34e-05	0.00144267	0.030577	0.459258	219.031	222.404	194.503	174.253	181.36	199.371	169.287	221.097	298.952	211.928	307.13	353.208	165.237	198.509
Slc27a4	998.997	2.06e-05	0.00144261	0.0307911	0.460028	1127.29	973.147	965.311	922.829	872.383	721.532	906.976	1028.52	1025.81	1066.59	1187.81	1062.33	1073.27	1052.16
Cks1b	67.4223	1.7e-05	0.00144272	0.0307513	0.460028	57.7086	87.7085	52.0276	64.0113	37.0664	43.909	50.4498	57.3939	83.5306	126.23	85.7108	77.1373	63.315	57.7136
Adra2b	187.638	1.2e-05	0.00144269	0.030794	0.460028	249.196	169.152	196.904	96.0169	96.6373	138.847	158.076	218.488	209.559	252.46	196.421	154.275	213.109	277.786
Trabd	2699.42	1.13e-05	0.00144268	0.0308509	0.460028	2531.97	2441.22	2356.45	2590.68	2283.55	2076.78	2000.06	2035.53	3833.62	3815.85	4235.54	3368.33	2327.21	1895.03
BC005764	69.1488	-1.03e-05	0.00144268	0.0306756	0.460028	82.6283	79.3553	62.4331	71.1236	59.5709	108.586	96.4152	67.1769	64.4798	24.3196	57.1406	56.838	80.3019	57.7136
Man1a	7703.09	-3.11e-05	0.00144274	0.0307842	0.460028	7152.59	7344.54	7972.22	9991.09	10001.3	8146.31	7734.52	6503.77	6719.09	7395.46	6169.04	7514.8	8512	6686.53
Lasp1	2099.57	-5.39e-05	0.00144315	0.0308359	0.460028	2357.53	2211.51	2036.28	1303.34	1460.15	1549.87	1819.56	2837.08	1943.19	2884.76	2163.48	2291.11	1535	3001.11
Rhbdd3	383.485	1.56e-05	0.00144268	0.0310632	0.460562	350.186	362.32	336.178	296.941	348.159	371.447	308.305	343.711	501.184	400.694	649.974	416.812	350.549	332.329
9130015A21Rik	5.07113	-2.61e-06	0.00144269	0.0310425	0.460562	0.65578	1.04415	3.2017	26.6714	15.8856	4.74692	2.24221	1.95661	2.9309	0	2.14277	2.70657	6.17707	0.634215
2010003K11Rik	1268.36	-7.99e-06	0.00144269	0.0310495	0.460562	1720.11	708.977	1169.42	2649.36	2405.34	1080.52	957.426	1052.66	1242.7	723.796	1202.81	776.787	761.324	1305.85
Tbk1	474.258	-1.77e-05	0.00144264	0.0310777	0.460562	457.734	460.47	489.059	492.531	593.062	494.867	621.093	525.676	360.501	415.749	394.984	399.22	457.103	477.564
Thrb	1773.1	-1.82e-05	0.00144267	0.0310315	0.460562	1887.33	1876.34	1834.57	1769.2	2381.51	2256.57	1640.18	1545.72	1280.8	1664.15	1248.52	1594.17	2135.72	1708.58
Gda	1884.47	-0.000155834	0.0014469	0.0310157	0.460562	1689.94	1790.72	1698.5	1957.68	3261.84	2750.25	1871.13	1473.98	1420.02	1168.5	1614.93	1906.78	2266.98	1511.33
Pick1	262.708	1.94e-05	0.00144265	0.0312512	0.460897	252.475	268.346	246.531	252.489	206.513	232.599	221.979	316.318	334.123	291.835	317.844	274.717	233.184	228.952
Fam188b	59.6637	9.8e-06	0.00144268	0.031216	0.460897	47.8719	57.4282	71.2377	46.2304	30.4474	48.6559	45.9654	43.0454	77.6688	78.749	97.1389	73.0775	66.4035	51.3714
Cdk3-ps	8.13392	-4.62e-06	0.00144269	0.0312856	0.460897	9.18092	5.22075	9.60509	10.6685	21.1808	17.2076	2.24221	1.95661	5.8618	5.79037	2.14277	8.11972	7.72134	6.97636
Crybg3	285.002	-1.18e-05	0.00144268	0.0312472	0.460897	239.36	257.905	367.395	245.377	413.025	372.04	373.329	285.665	171.458	297.625	174.993	307.196	220.83	263.833
Zfx	695.047	-1.82e-05	0.00144266	0.031201	0.460897	593.481	711.065	735.59	691.677	806.193	960.658	827.377	547.198	612.558	640.415	577.834	541.315	820.006	665.291
Smek1	1786.92	-2.11e-05	0.00144265	0.0312916	0.460897	1573.22	1706.14	2103.51	1545.16	2229.28	2165.78	2198.49	1721.82	1657.42	1546.03	1707.79	1619.88	1496.4	1745.99
Gstp1	1123.83	-1.19e-05	0.0014427	0.0313466	0.461238	838.087	950.176	729.987	2336.41	2102.19	1600.31	1039.27	580.461	715.14	1676.89	758.541	772.727	1042.38	591.088
Gle1	581.12	2.83e-05	0.00144259	0.03144	0.461722	529.87	586.812	541.887	556.542	504.367	557.17	554.948	590.896	605.231	660.102	714.971	604.919	545.126	582.844
Lyz1	4.3722	3.76e-06	0.00144269	0.0314433	0.461722	3.93468	1.04415	2.40127	5.33427	0	2.37346	2.24221	2.60881	17.5854	6.94845	7.85683	1.35329	3.08854	4.4395
Tnk2	710.674	-9.72e-06	0.00144268	0.0314842	0.461854	623.647	586.812	584.309	1449.14	1021.97	684.743	872.222	661.986	499.718	572.089	427.84	469.591	929.649	565.72
Lcor	221.954	-1.07e-05	0.00144269	0.0315344	0.462121	209.85	185.859	316.167	120.91	292.559	283.629	406.962	223.706	145.08	209.611	152.851	143.448	188.401	228.317
Fam129b	229.76	9.09e-06	0.00144269	0.0316123	0.462794	271.493	259.993	141.675	147.582	93.9897	129.354	213.01	365.886	156.803	140.127	227.134	249.005	311.942	508.64
Rccd1	82.2921	1.44e-05	0.00144267	0.0317623	0.464387	71.48	85.6202	74.4394	62.2332	58.2471	70.6105	85.2042	105.657	127.494	86.8556	97.8532	71.7242	74.1248	80.5453
Ptprr	4.40688	4.5e-06	0.00144269	0.0317853	0.464387	5.90202	1.04415	3.2017	3.55618	2.6476	1.18673	2.24221	9.13084	2.9309	5.79037	6.42831	9.47301	3.08854	5.07372
Fgfrl1	1253.38	1.36e-05	0.00144267	0.0318203	0.464428	1121.38	1225.83	1103.78	816.144	750.594	1055.6	1627.85	1643.55	1113.74	1195.13	1532.8	1521.09	1312.63	1527.19
Cuedc1	72.0809	1.36e-05	0.00144265	0.0319275	0.465524	71.48	64.7372	52.828	78.236	60.8947	59.9299	69.5087	82.1776	82.0652	83.3813	79.9968	62.2512	74.1248	87.5217
Sap30l	723.969	3.1e-05	0.00144265	0.0320386	0.466674	723.981	683.918	685.963	643.669	743.975	617.693	656.969	832.211	703.416	748.116	852.823	845.804	705.73	691.294
Bco2	420.816	1.51e-05	0.00144267	0.0323335	0.466677	359.367	499.103	455.441	291.607	293.883	341.185	383.419	465.021	460.151	385.639	573.548	544.021	404.598	434.437
Srprb	621.172	1.31e-05	0.00144267	0.0321613	0.466677	621.024	586.812	529.881	713.014	450.091	440.87	460.775	534.154	704.881	1027.21	799.253	713.182	569.835	545.425
Ccdc23	94.1919	1.08e-05	0.00144268	0.0323374	0.466677	102.302	100.238	70.4373	76.4579	55.5995	63.4901	90.8097	74.3511	106.978	89.1717	174.993	104.203	105.01	104.645
Crem	580.647	-3.74e-06	0.00144268	0.0323571	0.466677	445.93	428.101	593.915	1161.09	1089.49	707.291	485.439	275.882	498.253	460.914	589.262	358.621	765.957	268.907
1700045H11Rik	32.0396	-5.34e-06	0.00144269	0.0322902	0.466677	19.6734	40.7218	42.4225	28.4495	60.8947	58.1498	38.1177	13.6963	13.189	30.1099	25.7132	6.76643	61.7707	8.87901
Snx16	156.491	-1.48e-05	0.00144267	0.0323615	0.466677	137.058	168.108	196.104	172.475	177.389	220.732	139.017	111.527	142.149	135.495	142.851	147.508	183.768	116.696
Ppp1r15b	5886.95	-1.64e-05	0.00144255	0.0321044	0.466677	5525.6	5526.68	6612.3	5910.37	7509.91	6702.65	6113.4	5105.45	5195.02	5748.68	5146.94	6112.8	5778.65	5428.88
Wasl	3337.35	-1.86e-05	0.00144272	0.0322624	0.466677	2530.65	2981.05	2931.95	5129.79	5003.96	4750.48	3424.98	2838.39	2422.39	2624.2	2143.48	2794.54	4306.96	2840.01
Slc25a13	5444.62	-1.87e-05	0.00144265	0.0323504	0.466677	4484.88	5227.01	5209.16	6669.62	7218.67	6095.05	6548.39	4830.22	5017.7	4441.21	4353.4	5308.94	5784.83	5035.67
Ipo8	1429.24	-2.58e-05	0.00144263	0.0321206	0.466677	1381.73	1556.83	1435.96	1571.83	1497.22	1622.85	1608.79	1370.28	1115.21	1344.52	1170.67	1286.98	1578.24	1468.21
1810034E14Rik	190.416	7.55e-06	0.00144269	0.0325157	0.466677	224.277	239.11	193.703	71.1236	90.0183	115.706	124.443	251.75	256.454	238.563	277.846	253.065	95.7446	234.025
Thsd1	136.264	5.82e-06	0.00144267	0.0324637	0.466677	135.091	116.945	131.27	92.4607	83.3993	107.399	145.744	228.271	140.683	120.44	110.71	165.101	115.82	214.365
Pole2	5.59747	-4.99e-06	0.00144269	0.0325551	0.466677	7.21358	9.39734	6.40339	3.55618	10.5904	8.30711	5.60554	3.91322	1.46545	2.31615	4.28554	4.05986	6.17707	5.07372
Tmem181b-ps	43.182	-1.12e-05	0.00144268	0.0323984	0.466677	64.9222	45.9426	51.2271	35.5618	38.3901	56.9631	54.9343	48.9152	36.6362	27.7938	38.5699	28.419	29.3411	46.9319
Esd	613.63	-1.46e-05	0.00144268	0.0324528	0.466677	661.026	617.092	640.339	757.467	876.354	681.777	570.644	382.843	555.406	640.415	442.839	535.902	786.032	442.682
Slc17a2	4402.55	-1.49e-05	0.00144267	0.0325461	0.466677	3953.04	3833.07	4632.85	4791.95	6048.43	5601.37	5500.15	2886.65	3860	4094.95	5007.66	4216.84	4407.34	2801.33
Gm7102	114.903	1.88e-05	0.00144274	0.0327561	0.46788	104.925	107.547	96.0509	85.3484	93.9897	98.4986	56.0554	62.6115	177.319	165.605	245.704	123.149	118.909	72.9347
Pabpn1	2310.07	1.69e-05	0.00144269	0.0328331	0.46788	2070.3	2799.36	2097.11	1778.09	1454.85	2124.84	1956.33	3330.8	2904.52	2602.19	2342.76	2580.72	1717.23	2581.89
Ugt2b34	17168.6	1.46e-05	0.00144265	0.0327973	0.46788	16389.3	16775.3	17261.9	21534.5	21848	20077.1	18502.8	12022.7	14323.3	13217.1	19316.4	15771.2	20310.2	13010.9
Ihh	37.2345	4.8e-06	0.00144269	0.0327803	0.46788	21.6407	48.0309	68.036	8.89045	14.5618	15.4275	8.96886	46.9586	46.8944	52.1133	61.4261	52.7782	32.4296	43.1266
Cyp1a2	4887.52	-3.48e-06	0.00144267	0.0327248	0.46788	3383.17	4887.66	3721.97	9215.84	7400.03	5725.38	5440.73	3568.2	3731.04	5529.8	4422.68	4026.03	4722.37	2650.38
Osmr	140.906	-9.82e-06	0.00144268	0.0328075	0.46788	158.699	117.989	112.059	195.59	158.856	253.367	152.471	124.571	105.512	111.175	113.567	58.1913	159.06	151.577
Fam120a	4181.01	-5.69e-05	0.00144316	0.0329145	0.468578	3917.63	4164.07	4349.5	4445.23	5095.3	5019.28	5002.38	4419.98	3021.76	3669.94	2790.6	3873.11	4285.34	4480.09
Dhx32	670.602	1.6e-05	0.00144266	0.0331141	0.469304	696.438	746.567	713.178	455.191	559.967	452.738	594.187	769.6	721.001	728.429	809.253	768.667	576.012	797.208
Psph	86.5267	1.4e-05	0.00144267	0.0331926	0.469304	81.9725	80.3995	64.0339	87.1264	82.0755	67.6436	72.872	78.9166	128.96	105.385	111.424	98.7899	75.6691	76.1058
Creg1	15372	1.24e-05	0.00144268	0.0331701	0.469304	15778.1	14000	14160.3	12905.4	14953.6	10200.5	11578.8	12790.4	24780.8	17239.1	23524.8	17475	13546.3	12274.6
Nlrx1	300.838	1.16e-05	0.00144268	0.0331747	0.469304	326.578	308.024	258.537	158.25	217.103	207.678	335.211	406.975	230.076	353.213	290.703	331.555	327.385	460.44
Ttc25	27.5516	-3.59e-06	0.00144269	0.0330447	0.469304	7.86936	13.5739	16.8089	21.3371	31.7712	72.9839	106.505	30.0013	10.2581	6.94845	1.42851	17.5927	30.8854	17.758
Hnmt	1321.49	-6.38e-06	0.00144267	0.0331346	0.469304	1300.41	1598.59	1531.21	1161.09	1873.17	1844.18	1303.85	861.56	871.943	961.202	925.677	1203.07	2064.69	1000.16
Unc5b	387.1	-8.26e-06	0.00144268	0.0331345	0.469304	550.199	246.419	399.412	538.762	541.433	344.152	568.401	401.105	209.559	214.244	222.848	280.13	477.179	425.558
Gna11	2608.22	2.02e-05	0.00144264	0.0332467	0.469609	2524.1	2381.7	2452.5	2535.56	2317.97	2258.94	2318.45	2425.54	2982.19	3079.32	3639.14	2904.15	2250	2445.53
Lin9	66.9525	1.87e-05	0.00144269	0.0333664	0.470573	57.7086	77.267	72.0381	53.3427	48.9805	58.1498	48.2076	76.3078	60.0834	77.591	69.9972	82.5505	69.492	85.619
Tubb5	962.998	1.31e-05	0.00144267	0.03338	0.470573	1274.18	1051.46	778.012	753.91	546.729	656.262	837.467	1182.44	1006.76	1021.42	1196.38	990.606	942.003	1244.33
Hyou1	2595.15	1.28e-05	0.00144269	0.0334816	0.470973	2562.79	2556.08	2407.67	3036.98	1495.89	1662.61	1604.3	2859.26	2615.83	5250.71	2607.04	2939.34	2427.59	2306.01
Chd7	829.439	-1.18e-05	0.00144267	0.0334572	0.470973	802.675	761.185	805.226	944.166	1139.79	1041.36	1069.54	981.566	492.391	609.147	501.408	714.535	937.37	811.795
Ino80d	1076.82	-1.27e-05	0.00144267	0.0335061	0.470973	943.012	986.721	1121.39	1230.44	1371.45	1327.36	1514.62	1239.19	704.881	841.92	653.545	824.152	1139.67	1177.1
Rpl23	357.116	-1.56e-05	0.00144263	0.0336047	0.471902	386.91	392.6	381.002	392.958	413.025	424.256	324	297.405	269.643	319.628	271.418	381.627	429.306	315.839
Wwp2	344.599	1.98e-05	0.00144264	0.0336375	0.471904	347.563	388.423	272.945	286.273	301.826	267.014	352.028	423.932	369.293	383.323	361.414	368.094	313.486	388.774
Epor	31.8196	8.48e-06	0.00144269	0.0336798	0.472039	21.6407	31.3245	32.8174	23.1152	21.1808	21.9545	28.0277	24.1315	49.8253	61.3779	42.8554	37.892	16.9869	32.345
Ces2d-ps	131.926	-7.05e-06	0.00144269	0.0339366	0.473345	95.0881	157.667	88.847	254.267	141.646	249.213	142.381	105.005	64.4798	69.4845	114.995	58.1913	213.109	92.5954
Snhg1	74.1018	-9.15e-06	0.00144269	0.0338472	0.473345	64.9222	83.5319	64.8343	126.244	87.3707	81.8844	106.505	53.4806	104.047	33.5842	37.1414	86.6104	67.9478	39.3213
Dcun1d1	1757.69	-1.11e-05	0.00144264	0.0339087	0.473345	1535.18	1824.13	1975.45	1829.66	2317.97	2427.46	1667.09	1234.62	1472.78	1645.62	1498.51	1772.81	2077.04	1329.31
Vcpip1	1264.84	-1.43e-05	0.00144267	0.0338869	0.473345	1099.09	1240.45	1417.55	1065.08	1687.84	1676.85	1659.24	1165.49	1027.28	1132.6	782.826	1071.8	1368.22	1313.46
Smg7	932.522	-2.39e-05	0.00144265	0.0338817	0.473345	895.795	887.527	994.126	1031.29	1047.12	1063.31	1104.29	999.175	706.347	819.917	747.827	845.804	926.561	986.204
Wdr86	9.79483	4.52e-06	0.00144269	0.0340991	0.473784	7.21358	8.35319	10.4055	0	2.6476	7.12038	8.96886	9.78305	13.189	16.213	30.713	12.1796	4.6328	5.70793
St3gal5	9089.66	-6.52e-06	0.00144269	0.0340249	0.473784	6715.19	6758.78	5871.91	24260.3	14782.9	12796.5	7620.17	4654.77	7674.56	5258.81	5404.78	6874.7	13926.2	4655.77
Dmxl1	1024.74	-1.51e-05	0.00144268	0.034069	0.473784	817.102	1070.25	1223.85	988.618	1215.25	1506.55	1180.53	817.21	811.859	1031.84	654.974	887.756	1253.95	886.632
Klc4	1092.65	-3.84e-05	0.00144271	0.0340496	0.473784	1053.84	1145.43	1153.41	1232.22	1273.49	1098.91	1145.77	1168.75	912.975	929.934	1067.1	1069.1	1070.18	976.057
Zbtb42	173.357	1.19e-05	0.00144268	0.0341473	0.473999	215.096	161.843	166.488	110.242	150.913	114.519	132.291	221.749	213.956	213.086	217.848	184.047	111.187	213.73
Lrpap1	710.237	2.34e-05	0.00144262	0.0342222	0.474128	666.928	761.185	645.142	698.79	595.709	597.519	671.543	907.214	678.503	691.37	813.539	699.649	730.439	785.792
Klhl26	187.371	8.58e-06	0.0014426	0.0342119	0.474128	169.847	144.093	164.087	163.584	153.561	176.823	228.706	195.009	183.181	218.876	231.419	198.933	191.489	203.583
Ccdc32	273.723	1.1e-05	0.00144268	0.034278	0.474176	269.526	287.141	309.764	177.809	213.132	195.217	174.893	233.489	468.944	341.632	344.986	353.208	188.401	273.981
Tmem87a	254.958	-2e-05	0.00144267	0.0342912	0.474176	224.277	276.699	236.125	305.832	243.579	366.106	293.73	236.097	249.126	239.721	218.563	242.238	236.273	201.046
Zbtb7b	3259.45	0.000643484	0.00152767	0.0348342	0.474342	2992.32	3035.34	3178.48	3360.59	2958.69	2439.92	2871.16	3926.91	3745.69	4433.11	3242.01	3418.4	2554.22	3475.5
Ctdsp1	4460.43	4.77e-05	0.00144285	0.0350235	0.474342	4678.99	4018.93	4335.9	3979.37	4179.23	4139.91	4085.32	4306.5	4718.75	4899.81	5577.63	4936.79	4319.32	4269.53
Micu1	522.111	2.49e-05	0.0014427	0.034714	0.474342	586.267	509.545	481.055	444.523	477.891	353.646	485.439	519.806	634.54	599.882	652.117	550.788	500.343	513.714
Cant1	934.486	1.73e-05	0.00144263	0.0349829	0.474342	1030.23	893.792	941.298	729.017	867.088	773.748	764.595	1062.44	923.233	1046.9	1058.53	1113.76	761.324	1116.85
Vasp	262.143	1.65e-05	0.00144266	0.0344753	0.474342	310.84	252.684	248.131	241.82	173.418	218.358	209.647	324.145	259.385	289.519	307.13	230.059	279.512	325.352
Tbcc	369.036	1.38e-05	0.00144267	0.0349102	0.474342	361.335	323.686	335.378	334.281	374.635	267.014	283.64	345.668	596.438	428.487	421.412	485.83	290.322	318.376
Dyrk1b	277.605	1.27e-05	0.00144267	0.0344704	0.474342	286.576	280.876	257.736	241.82	169.446	189.877	279.156	397.192	252.057	342.79	280.703	313.963	213.109	381.163
Mmp14	828.758	1.11e-05	0.00144268	0.0346815	0.474342	986.293	763.273	758.001	606.329	889.592	497.24	479.834	1048.74	968.662	1244.93	804.253	950.007	583.733	1021.72
Slc25a10	6132.15	1.04e-05	0.00144261	0.034884	0.474342	6439.1	5016.09	5426.87	5199.14	5819.42	4442.52	6743.46	6148.97	6899.34	5792.69	8515.37	7357.82	5857.41	6191.84
Ssna1	300.363	1.03e-05	0.00144268	0.0349993	0.474342	328.546	240.154	267.342	282.716	232.988	250.993	179.377	226.314	470.409	310.364	544.264	365.387	256.348	249.881
2700046G09Rik	47.5127	1e-05	0.00144268	0.0351359	0.474342	43.2815	60.5606	38.4203	30.2275	34.4188	29.6683	40.3599	54.7851	82.0652	28.9519	67.8544	51.4249	55.5936	47.5661
Pde4d	314.422	9.96e-06	0.00144268	0.034473	0.474342	278.706	259.993	363.392	229.374	254.169	149.528	297.093	467.63	253.523	289.519	252.847	263.891	501.887	540.351
Bik	100.212	8.12e-06	0.00144268	0.0346075	0.474342	120.008	101.282	84.8449	90.6826	59.5709	57.5564	54.9343	78.9166	155.338	163.288	162.851	127.209	60.2264	86.2532
1700007L15Rik	41.5143	7.71e-06	0.00144269	0.0347157	0.474342	33.4448	40.7218	35.2186	33.7837	26.476	34.4152	24.6644	30.0013	63.0143	59.0618	73.5685	78.4906	18.5312	29.8081
Eln	30.9933	6.77e-06	0.00144269	0.0347838	0.474342	42.6257	24.0154	17.6093	19.559	17.2094	16.6142	29.1488	54.7851	33.7053	34.7422	26.4275	13.5329	38.6067	65.3241
Il22ra1	347.874	6.63e-06	0.00144269	0.0349539	0.474342	434.782	420.792	352.987	241.82	137.675	121.046	189.467	545.242	479.202	422.697	390.699	458.764	168.325	506.738
Mir466d	17.574	6.25e-06	0.00144269	0.0348445	0.474342	10.4925	5.22075	21.6114	3.55618	14.5618	13.054	17.9377	16.9573	32.2399	44.0068	19.2849	27.0657	9.26561	10.7817
Rspo1	15.0822	4.63e-06	0.00144269	0.0345348	0.474342	6.5578	17.7505	2.40127	14.2247	7.94279	7.12038	16.8166	16.9573	13.189	50.9553	7.85683	12.1796	20.0755	17.1238
Plxna2	554.772	4.17e-06	0.00144268	0.0346525	0.474342	613.154	512.677	622.73	263.157	219.751	354.239	459.654	1054.61	312.141	738.851	569.977	581.913	384.523	1079.43
Sdhaf1	754.164	4.11e-06	0.00144268	0.0351629	0.474342	716.112	784.156	766.806	556.542	538.786	550.05	396.872	503.501	1485.97	872.03	1267.81	1017.67	555.936	546.059
Tnfaip8l3	16.4	3.65e-06	0.00144269	0.035011	0.474342	20.3292	18.7947	12.8068	0	1.3238	8.30711	5.60554	31.9579	35.1708	18.5292	28.5703	20.2993	0	27.9055
Serpina4-ps1	1763.23	-2.3e-06	0.00144269	0.035144	0.474342	443.307	432.278	1272.67	3454.83	4900.7	4387.34	3978.81	41.0888	890.994	1917.77	1484.94	642.811	809.196	28.5397
Mid1ip1	1042.37	-3.53e-06	0.00144268	0.0349387	0.474342	802.019	600.386	1062.16	1024.18	1407.2	1540.38	2219.79	997.871	578.853	724.954	582.119	929.708	1059.37	1064.21
Acly	3020.56	-5.17e-06	0.00144269	0.0351886	0.474342	1592.23	1670.64	1882.6	3913.58	5217.09	5519.48	7509.18	2114.44	924.699	1350.31	1282.81	1366.82	5523.85	2420.16
Trak2	993.601	-1.39e-05	0.00144265	0.0351412	0.474342	1188.27	1079.65	1145.41	1018.85	1172.89	961.845	1106.53	1102.22	637.471	822.233	662.83	849.864	1056.28	1106.07
D1Ertd622e	521.697	-1.54e-05	0.0014427	0.0344794	0.474342	443.307	467.779	432.229	757.467	778.393	675.843	625.578	414.801	386.879	324.261	414.983	399.22	739.704	443.316
Slc16a6	263.061	-3.09e-05	0.00144283	0.0351434	0.474342	306.249	278.788	299.359	396.514	238.284	302.023	301.578	271.969	181.716	228.141	109.281	166.454	344.372	258.125
Crcp	550.533	-1.35e-05	0.00144267	0.0352484	0.474705	523.312	607.695	499.464	762.801	636.747	674.656	593.066	532.85	558.336	318.47	392.127	508.836	664.035	435.071
Tra2b	615.918	-1.07e-05	0.00144268	0.0352872	0.474786	453.8	534.604	627.532	823.256	969.02	956.505	568.401	449.368	590.576	518.817	412.126	525.075	764.413	429.364
Lrrc42	311.177	1.51e-05	0.00144268	0.0353253	0.474856	350.186	352.922	296.157	176.031	243.579	217.172	288.125	354.798	339.984	362.477	402.841	342.382	259.437	370.382
Arhgef39	8.45991	4.92e-06	0.00144269	0.035417	0.475093	5.90202	9.39734	8.00424	3.55618	9.26659	2.96683	4.48443	11.7397	10.2581	11.5807	15.7137	4.05986	13.8984	7.61058
Ap2m1	1171.56	-6.08e-06	0.00144257	0.0353837	0.475093	1147.61	1081.74	992.526	1178.87	1073.6	966.592	1117.74	1095.7	1376.06	1466.12	1513.51	1262.62	1030.03	1099.09
Hist1h2bf	34.3996	-9.5e-06	0.00144268	0.0354415	0.475093	40.6584	50.1192	34.4182	32.0056	42.3615	32.0417	47.0865	19.5661	51.2907	31.268	29.2845	29.7723	16.9869	24.7344
Ncald	554.782	1.14e-05	0.0014427	0.0355507	0.475477	459.702	634.843	615.526	280.938	260.788	354.239	557.19	476.76	986.248	639.257	942.105	692.883	398.421	468.051
Nolc1	561.453	-3.86e-05	0.00144289	0.0355221	0.475477	570.529	563.84	685.963	529.871	676.461	589.212	766.837	701.77	400.068	495.656	350.7	502.069	429.306	598.065
9430023L20Rik	1092.87	-0.000203551	0.00144997	0.0355688	0.475477	914.813	990.897	1007.73	897.936	1114.64	843.765	750.021	733.728	1692.59	1439.49	1741.36	1349.23	1114.96	709.052
Taf4b	101.578	-1.41e-05	0.00144266	0.0357096	0.47692	107.548	98.15	100.053	87.1264	133.704	154.275	102.021	90.004	84.9961	85.6975	88.5679	101.497	103.466	84.9848
Dgke	92.4972	1.45e-05	0.00144267	0.0358487	0.477921	78.0378	85.6202	93.6496	101.351	68.8375	81.291	65.0242	120.005	111.374	118.124	79.2825	77.1373	121.997	93.2296
Snord2	8.05793	-4.76e-06	0.00144269	0.0358507	0.477921	3.2789	10.4415	13.6072	1.77809	13.238	11.8673	20.1799	3.26102	4.39635	2.31615	5.71406	6.76643	7.72134	8.24479
Lrrc41	813.846	1.99e-05	0.00144265	0.0358977	0.478108	756.114	687.05	714.779	766.357	807.517	754.76	735.446	669.813	907.114	1045.74	1030.67	990.606	781.399	746.471
Msc	10.6101	-6.25e-06	0.00144269	0.0360032	0.478939	22.9523	12.5298	9.60509	12.4466	11.9142	17.801	6.72664	8.47864	7.32725	5.79037	12.1424	5.41315	4.6328	10.7817
Ldlrap1	787.293	-8.28e-05	0.00144371	0.0360264	0.478939	794.15	705.845	807.628	704.124	745.298	637.868	745.536	746.12	902.717	924.143	913.535	855.277	688.743	851.116
Siglecg	7.13508	4.12e-06	0.00144269	0.0361441	0.480063	9.8367	2.0883	5.60297	3.55618	3.97139	5.93365	1.12111	14.3485	19.0508	3.47422	10.7139	5.41315	4.6328	10.1474
Tmtc2	435.606	-4.04e-05	0.0014429	0.0361933	0.480275	401.337	351.878	489.859	570.767	628.804	480.626	440.595	384.8	389.81	421.539	292.131	382.98	455.559	407.8
1810030O07Rik	225.059	2.12e-05	0.00144264	0.0364379	0.481	224.277	242.243	212.112	218.705	194.598	169.702	196.194	221.097	259.385	254.776	267.132	235.472	222.375	232.757
Sdccag8	149.811	1.55e-05	0.00144266	0.0364387	0.481	133.123	145.137	138.473	110.242	132.38	132.32	152.471	217.184	137.752	186.45	144.994	184.047	145.161	137.625
Zbtb43	1052.56	6.13e-06	0.00144256	0.0364549	0.481	940.388	978.368	1171.02	1041.96	1224.51	1276.92	1276.94	983.522	961.335	992.47	1128.53	985.193	835.449	939.272
Hspa1a	186.4	-3.55e-06	0.00144269	0.0364759	0.481	211.817	67.8697	124.066	328.947	680.432	203.524	205.163	112.179	27.8435	64.8522	29.9988	97.4367	316.575	138.893
Pdzd9	7.77064	-5.22e-06	0.00144269	0.0364807	0.481	7.86936	11.4856	12.8068	7.11236	10.5904	12.4607	6.72664	9.13084	2.9309	4.6323	4.28554	4.05986	7.72134	6.97636
Ikzf5	421.274	-1.23e-05	0.00144267	0.0363413	0.481	311.495	357.099	469.849	497.865	571.881	630.747	480.955	297.405	496.788	398.378	339.272	339.675	418.497	287.934
Txndc9	595.636	-2.4e-05	0.0014426	0.0364607	0.481	646.599	630.666	576.305	643.669	677.785	615.913	639.031	453.933	622.816	610.305	553.549	548.081	608.441	511.811
Unc79	19.6997	4.21e-06	0.00144269	0.0366454	0.482026	10.4925	9.39734	27.2144	3.55618	14.5618	13.6474	7.84775	14.3485	61.5489	31.268	39.2841	33.8322	3.08854	5.70793
Rbm26	432.764	-1.52e-05	0.00144266	0.0366585	0.482026	327.89	473	449.838	405.405	558.643	590.398	534.768	464.369	348.777	399.536	345.7	354.561	449.382	356.429
Gpbp1l1	1183.49	-1.9e-05	0.00144264	0.0366222	0.482026	994.162	1231.05	1289.48	1205.55	1440.29	1440.1	1367.75	1095.05	1022.88	946.147	932.82	1067.74	1368.22	1167.59
Slc45a4	262.182	1.59e-05	0.00144269	0.0366946	0.482063	261	288.185	258.537	163.584	172.094	204.118	263.46	370.451	291.625	313.838	255.704	285.544	196.122	346.281
Zfp326	231.85	-1.33e-05	0.00144267	0.0367366	0.482176	188.865	233.889	285.751	261.379	264.76	309.737	272.429	266.751	221.283	155.182	162.136	151.568	260.981	211.194
Cox15	888.123	2.88e-05	0.00144258	0.0371066	0.482203	901.042	908.41	822.836	714.793	833.993	791.549	896.886	903.953	977.455	977.415	934.248	1010.91	843.17	917.075
Cdc23	169.441	1.73e-05	0.00144265	0.0368265	0.482203	157.387	172.285	150.48	110.242	165.475	155.462	165.924	174.79	227.145	185.292	201.42	173.221	138.984	194.07
Mri1	385.507	1.42e-05	0.00144266	0.0371316	0.482203	382.975	360.231	342.581	346.728	313.74	276.508	385.661	339.146	578.853	430.804	501.408	470.944	332.018	335.5
Rasl2-9	345.552	1.17e-05	0.00144268	0.037103	0.482203	351.498	295.494	305.762	341.393	244.903	262.267	297.093	271.316	512.907	393.745	579.977	403.279	260.981	317.107
Cbx8	239.413	1.07e-05	0.00144268	0.0370024	0.482203	212.473	268.346	222.518	158.25	187.979	181.57	199.557	211.966	410.326	324.261	319.987	299.076	189.945	165.53
Nkd1	131.627	1.05e-05	0.00144268	0.0371387	0.482203	137.058	131.563	148.078	72.9017	74.1327	104.432	115.474	202.835	131.89	172.553	173.564	115.029	92.6561	170.604
Arrdc3	5909.67	9.09e-06	0.00144268	0.0370712	0.482203	3690.73	5340.82	6327.35	2268.84	3819.16	5287.48	7616.8	5863.96	6308.76	10213.1	8283.95	4886.72	6129.2	6698.58
Olfm3	261.324	-8.82e-06	0.00144268	0.0369557	0.482203	203.948	379.026	351.386	192.034	287.264	417.136	319.516	197.618	146.545	133.179	188.564	213.819	415.408	213.096
Gm10069	129.209	-9.37e-06	0.00144266	0.0370977	0.482203	102.302	123.21	106.456	177.809	153.561	180.383	179.377	123.266	108.443	90.3298	147.851	108.263	108.099	99.5717
Gnl3	357.564	-1.21e-05	0.00144267	0.0369923	0.482203	331.169	305.936	410.617	417.851	414.349	286.002	659.211	339.798	322.399	280.254	320.701	254.418	375.257	287.934
Ndufs1	1661.1	-1.77e-05	0.00144265	0.0370862	0.482203	1519.44	1620.52	1640.87	1847.44	2062.48	2204.94	1752.29	1464.2	1348.21	1491.6	1307.8	1423.66	2027.62	1544.31
Rrn3	450.802	-1.99e-05	0.00144256	0.0369285	0.482203	445.93	452.117	563.498	437.41	455.387	460.451	532.526	378.93	445.497	426.171	422.126	420.872	444.749	425.558
Npnt	10.738	6.04e-06	0.00144269	0.0372028	0.482602	15.0829	10.4415	11.2059	1.77809	5.29519	3.56019	2.24221	22.1749	13.189	9.26459	9.28534	10.8263	6.17707	29.8081
Agpat3	6720.17	-0.000239785	0.00145271	0.0373185	0.483669	7146.69	6462.24	6621.91	5641.88	6285.39	5282.14	6541.66	7146.19	7709.73	7200.91	7199	7356.47	5828.07	7660.05
Arpc1b	351.966	-1.83e-05	0.00144266	0.0373522	0.483673	420.355	361.276	320.17	501.422	424.939	335.251	325.121	325.449	370.759	260.567	306.416	346.441	324.296	305.057
Plcb1	624.525	-1.1e-05	0.00144268	0.0374226	0.484075	486.589	517.898	590.713	960.169	1053.74	769.595	603.156	519.806	468.944	494.498	419.269	571.087	755.147	532.741
Galk2	388.195	-1.71e-05	0.00144263	0.0374502	0.484075	403.96	439.587	366.594	389.402	524.224	448.584	367.723	314.362	347.312	309.206	371.414	364.034	450.926	337.402
Atp2c1	746.01	-1.64e-05	0.00144262	0.0375191	0.484533	649.222	792.509	777.212	974.394	933.278	853.852	658.09	623.506	712.209	661.26	720.685	744.308	722.717	620.896
Lrfn3	334.66	8.82e-06	0.00144269	0.0375699	0.484755	422.322	277.744	322.571	316.5	281.969	131.134	164.803	459.803	487.995	428.487	292.845	447.938	197.666	453.464
Slc16a4	41.9647	-1.03e-05	0.00144269	0.0376677	0.485179	27.5428	71.0021	60.0318	33.7837	51.6281	54.5896	48.2076	48.9152	29.309	25.4776	26.4275	44.6585	24.7083	41.224
Zfp146	498.919	-1.34e-05	0.00144267	0.0376698	0.485179	484.621	528.339	693.167	385.846	545.405	607.013	650.242	569.373	427.911	393.745	322.844	426.285	390.7	559.378
Ung	272.403	-1.1e-05	0.00144268	0.0377875	0.486262	356.744	207.786	259.337	382.29	428.911	254.554	288.125	183.921	344.381	279.096	231.419	205.7	234.729	156.651
Ino80e	98.171	1.53e-05	0.00144265	0.0378258	0.486323	94.4323	88.7527	92.8492	92.4607	72.8089	89.0048	88.5675	101.091	120.167	129.704	120.709	115.029	78.7577	90.0585
Inca1	317.818	1.25e-05	0.00144267	0.0378638	0.486379	262.312	379.026	291.354	213.371	222.398	288.969	309.426	402.409	411.791	281.412	407.841	407.339	247.083	324.718
Fam199x	665.095	-1.4e-05	0.00144266	0.0379049	0.486474	577.742	727.772	762.004	567.211	868.412	908.442	730.962	562.199	565.664	573.247	416.412	682.057	738.16	631.044
Neu1	1586.65	1.38e-05	0.00144267	0.0379746	0.486856	1655.19	1843.97	1519.2	1404.69	1122.58	1146.38	1174.92	1455.72	2007.67	1895.77	2327.76	1767.39	1490.22	1401.61
Poc1a	29.5565	-4.58e-06	0.00144267	0.0380131	0.486856	32.1332	28.192	31.2165	33.7837	29.1236	40.9422	45.9654	32.6102	21.9817	11.5807	28.5703	25.7124	24.7083	27.2712
Nasp	154.288	-2.3e-05	0.00144266	0.0380356	0.486856	146.895	159.755	156.083	192.034	172.094	179.196	161.439	148.702	164.13	116.965	148.565	138.035	132.807	143.333
Chac1	309.983	-5.57e-06	0.00144269	0.0382101	0.488657	260.345	226.58	218.516	533.427	848.555	341.778	294.851	135.658	177.319	151.708	331.415	198.933	506.52	114.159
Rc3h2	1125.16	-1.42e-05	0.00144267	0.0383033	0.489416	917.436	1231.05	1127.8	1459.81	1335.71	1596.15	1070.66	819.167	1085.9	950.779	919.249	1000.08	1411.46	827.016
Slx1b	350.784	1.53e-05	0.00144268	0.0385016	0.489565	349.531	383.203	336.178	318.278	272.702	277.695	235.433	391.322	505.58	330.051	458.553	454.704	260.981	336.768
Glt28d2	253.339	1.4e-05	0.00144267	0.0384549	0.489565	226.244	296.538	262.539	160.028	221.074	195.217	213.01	238.054	347.312	266.357	288.56	354.561	225.463	251.783
Wnt9a	44.32	9.7e-06	0.00144269	0.0383911	0.489565	50.4951	34.4569	51.2271	17.7809	29.1236	17.2076	49.3287	54.1329	73.2725	48.6391	64.2831	47.365	32.4296	50.7372
Serpina3g	209.083	-8.45e-06	0.00144268	0.0383525	0.489565	248.541	148.269	143.276	275.604	285.94	417.136	207.405	136.31	205.163	184.134	220.705	83.9038	186.856	183.922
Cacna2d1	47.4275	-1.13e-05	0.00144267	0.0384297	0.489565	47.2162	67.8697	53.6284	62.2332	35.7426	61.1166	44.8443	35.8712	49.8253	34.7422	40.7126	35.1855	52.5051	42.4924
Ripk1	1133.44	-2.01e-05	0.00144265	0.038518	0.489565	1050.56	996.118	1054.16	1239.33	1570.02	1405.09	1264.61	969.174	1040.47	1077.01	1072.81	1043.38	1147.39	938.004
Zbp1	246.397	1.3e-05	0.0014427	0.0386117	0.490325	275.428	182.726	214.514	160.028	202.541	233.193	177.135	213.27	344.381	252.46	505.694	316.669	194.578	176.946
Pigf	43.0619	-7.51e-06	0.00144268	0.0386543	0.490435	38.691	39.6777	44.0233	96.0169	52.9519	52.2161	34.7543	22.1749	30.7744	32.4261	50.7122	31.1256	49.4166	27.9055
Prkaa1	425.278	-1.84e-05	0.00144264	0.0387065	0.490666	402.649	431.234	463.445	442.745	444.796	552.423	476.471	418.062	382.482	367.11	329.272	332.909	491.077	419.216
1700003E16Rik	61.6736	7.3e-06	0.00144269	0.03884	0.491498	64.2664	61.6048	88.0466	28.4495	31.7712	38.5687	28.0277	75.0033	83.5306	82.2233	91.4249	86.6104	27.7968	76.1058
Parp16	1182.64	-6.14e-06	0.00144269	0.0388303	0.491498	642.664	668.255	625.931	3840.68	1942.01	1880.37	835.225	645.029	890.994	874.346	824.252	918.882	1365.13	603.138
Ubxn1	782.701	1.82e-05	0.00144264	0.0389381	0.491646	758.082	868.732	734.789	828.59	589.09	600.486	648	840.69	914.441	919.511	932.82	871.517	724.262	726.81
Zfp369	199.738	-1.48e-05	0.00144267	0.0389537	0.491646	216.407	214.051	250.533	165.362	211.808	214.205	276.914	230.228	156.803	185.292	151.422	170.514	135.896	216.902
Chd3	2737.54	-3.8e-05	0.00144289	0.0388932	0.491646	2781.16	2778.48	2527.74	3618.41	3782.09	3061.76	2903.67	3763.86	1793.71	2403	1924.92	2384.49	1955.04	2647.21
Usp20	150.662	1.03e-05	0.00144267	0.0390289	0.492166	160.01	160.799	132.07	154.694	95.3135	94.9384	117.716	225.662	130.425	176.027	158.565	170.514	111.187	221.341
Adam9	1829.45	2.32e-05	0.00144269	0.0391117	0.492354	1838.81	1906.62	1910.61	2229.73	2270.31	1838.84	1927.18	1747.9	1261.75	1570.35	1396.37	1663.19	2172.78	1877.91
Disp2	79.3008	1.29e-05	0.00144267	0.0391474	0.492354	72.1358	60.5606	53.6284	72.9017	79.4279	63.4901	90.8097	91.9606	71.807	106.543	91.4249	58.1913	103.466	93.8638
Cask	595.281	-1.54e-05	0.00144266	0.03918	0.492354	508.229	601.43	573.103	634.778	848.555	742.3	667.059	466.325	474.806	533.872	484.266	617.099	702.642	479.466
Zfp236	547.681	-2.17e-05	0.00144264	0.0391789	0.492354	529.214	546.09	642.74	520.981	604.976	658.042	615.488	592.2	410.326	497.972	452.839	495.303	555.936	545.425
Tdo2	28117	1.12e-06	0.00144266	0.0392432	0.492513	23987.8	28573.1	27392.1	44960.8	38942.2	32642.8	29470.5	16284.9	26499.7	24015	20054.9	21797.4	41702.9	17313.4
Zyg11a	125.796	-9.08e-06	0.00144268	0.0392948	0.492513	132.468	113.812	145.677	104.907	154.884	112.739	264.581	140.876	80.5997	74.1167	114.281	78.4906	100.377	143.333
Uba6	179.826	-1.16e-05	0.00144267	0.0392879	0.492513	154.764	183.77	216.114	192.034	242.255	230.226	192.83	180.66	153.872	133.179	96.4247	152.921	176.047	212.462
Csf1	369.31	-1.16e-05	0.00144267	0.0395087	0.494765	538.395	273.567	404.214	344.95	337.569	493.68	526.92	331.319	276.97	471.336	309.987	303.136	242.45	315.839
4930404N11Rik	199.809	1.55e-05	0.00144266	0.0401513	0.495978	219.031	204.653	200.906	122.688	145.618	182.756	176.014	224.358	224.214	248.986	199.278	265.244	194.578	188.996
Prkaca	1281.51	1.5e-05	0.00144247	0.0404036	0.495978	1320.74	1228.96	1238.26	1217.99	1166.27	1070.43	1254.52	1404.19	1226.58	1381.58	1428.51	1414.18	1172.1	1416.84
Dhx58	376.31	1.46e-05	0.00144266	0.040397	0.495978	361.335	451.072	328.974	284.495	235.636	383.907	309.426	357.407	507.046	462.072	435.697	426.285	341.283	383.7
Fbxo25	121.435	1.45e-05	0.00144267	0.0401265	0.495978	125.254	116.945	137.673	72.9017	87.3707	111.553	102.021	137.615	117.236	143.601	172.136	135.329	103.466	136.99
Slc27a1	301.903	1.42e-05	0.00144267	0.0399039	0.495978	268.214	315.333	289.753	254.267	218.427	211.238	322.879	410.236	404.464	313.838	262.847	351.855	231.64	371.65
Zkscan6	127.385	1.42e-05	0.00144267	0.0397993	0.495978	108.204	97.1059	116.061	103.129	104.58	91.9716	171.529	138.919	155.338	140.127	158.565	146.155	145.161	106.548
Igtp	1172.01	1.33e-05	0.00144266	0.0399981	0.495978	1207.95	1119.33	1068.57	679.231	1018	1190.88	1025.81	1130.27	1264.68	1313.26	1624.22	1652.36	971.344	1142.22
Rpusd3	219.578	1.19e-05	0.00144266	0.0404282	0.495978	205.259	221.36	192.902	204.48	174.741	153.088	209.647	187.182	293.09	265.199	329.987	263.891	165.237	208.022
Xaf1	138.986	1.01e-05	0.00144268	0.0397509	0.495978	137.714	156.622	129.669	83.5703	76.7803	125.2	117.716	210.662	153.872	116.965	203.563	173.221	86.479	173.775
Cmpk2	286.163	8.99e-06	0.00144268	0.0398637	0.495978	278.706	302.803	309.764	145.803	119.142	250.993	257.855	317.623	284.297	478.285	442.125	305.843	191.489	321.547
Chadl	41.0308	7.53e-06	0.00144268	0.0397992	0.495978	43.2815	54.2957	44.8237	30.2275	15.8856	21.9545	25.7855	51.524	46.8944	42.8487	42.1412	63.6045	41.6952	49.4688
Iqce	144.039	6.41e-06	0.00144269	0.0400199	0.495978	175.093	151.402	164.887	37.3399	55.5995	72.3906	117.716	271.969	134.821	171.395	182.85	178.634	74.1248	228.317
Sulf1	25.7028	4.43e-06	0.00144269	0.0400592	0.495978	15.0829	31.3245	4.80254	23.1152	6.61899	8.30711	33.6332	30.0013	24.9126	84.5394	14.2851	13.5329	38.6067	31.0765
Fxyd5	28.5652	-6.37e-06	0.00144269	0.0397697	0.495978	37.3795	34.4569	19.2102	64.0113	45.0091	19.5811	26.9066	21.5227	27.8435	9.26459	18.5707	13.5329	41.6952	20.9291
1810032O08Rik	52.5472	-9.52e-06	0.00144268	0.0404285	0.495978	41.9699	53.2516	53.6284	92.4607	66.1899	54.5896	65.0242	36.5234	43.9635	33.5842	60.7118	32.4789	66.4035	34.8818
Smek2	1884.31	-9.61e-06	0.00144264	0.0401216	0.495978	1642.73	1933.76	1952.23	1829.66	2617.15	2760.93	1770.23	1329.19	1862.59	1881.87	1635.65	1764.69	1900.99	1498.65
Fmnl2	293.763	-9.93e-06	0.00144268	0.0398164	0.495978	276.739	261.037	264.94	478.306	272.702	488.933	334.09	247.185	227.145	204.979	159.279	202.993	407.687	286.665
Ipmk	2869.14	-1.09e-05	0.00144269	0.0403896	0.495978	2316.87	2479.85	2435.69	5065.78	4216.3	3276.56	3481.04	1877.69	2064.82	1958.3	2287.05	2234.28	4354.83	2118.91
Gk2	109.519	-1.3e-05	0.00144268	0.0403046	0.495978	139.681	113.812	116.862	99.5731	181.36	107.399	105.384	68.4813	120.167	120.44	77.1397	77.1373	94.2003	111.622
Nob1	161.161	-1.43e-05	0.00144266	0.0403898	0.495978	163.289	143.048	198.505	193.812	206.513	156.648	179.377	131.093	175.854	134.337	127.852	159.688	182.224	104.011
Simc1	232.413	-1.47e-05	0.00144267	0.0401618	0.495978	208.538	218.227	268.142	227.596	300.502	282.442	294.851	256.968	150.941	180.66	193.564	181.34	257.893	232.123
Ccny	1998.69	-1.94e-05	0.00144261	0.0399168	0.495978	1889.96	1913.93	2075.5	2275.96	2407.99	2280.9	2151.41	1691.16	1619.32	1821.65	1726.36	1832.35	2384.35	1910.89
Sarnp	81.6823	-1.98e-05	0.00144272	0.0402238	0.495978	66.2338	92.9293	84.0445	129.801	93.9897	105.026	77.3564	50.8718	77.6688	88.0136	67.8544	86.6104	78.7577	44.395
Lmna	1098.2	-7.87e-05	0.00144372	0.0400231	0.495978	1394.19	1094.27	1081.37	732.573	769.127	731.619	949.578	1507.89	1110.81	1314.41	1202.81	1281.56	838.537	1366.1
Ube2q2	899.465	-1.08e-05	0.00144267	0.0405581	0.497145	750.868	862.467	799.623	1582.5	1178.18	1110.78	828.498	665.899	712.209	759.697	650.688	863.397	1107.24	720.468
Glt25d1	1777.63	8.99e-05	0.00144394	0.0406038	0.497285	1959.47	1810.55	1776.14	1543.38	1535.61	1406.28	1565.07	1994.44	1811.3	1858.71	2067.06	1979.86	1584.42	1994.61
AI837181	473.368	1.89e-05	0.00144265	0.0407206	0.497735	531.838	464.646	450.639	416.073	393.168	357.206	422.657	460.455	603.765	524.608	549.264	567.027	410.775	475.027
Sh3glb2	388.46	9.46e-06	0.00144261	0.0409159	0.497735	387.566	393.644	331.375	344.95	334.921	338.812	350.907	353.494	416.188	404.168	584.976	434.405	412.319	350.721
Cldn1	1266.68	7.91e-06	0.00144268	0.0407506	0.497735	1473.54	1422.13	1298.29	688.121	1147.73	758.914	584.097	1338.32	1720.44	2182.97	1260.66	1504.85	858.613	1494.84
Srcin1	6.68662	4.94e-06	0.00144269	0.040822	0.497735	4.59046	9.39734	6.40339	0	3.97139	2.37346	5.60554	13.0441	11.7236	6.94845	4.28554	6.76643	7.72134	10.7817
Cldn14	507.832	-5.5e-06	0.00144269	0.0408514	0.497735	418.388	250.596	350.586	1671.41	924.011	402.895	458.533	251.098	422.05	392.587	358.557	269.304	698.009	241.636
Keg1	2499.7	-6.85e-06	0.00144268	0.0408956	0.497735	2495.24	2461.06	3409.81	2284.85	2605.23	3599.35	4078.59	913.736	1519.67	2707.58	2604.89	1832.35	3554.9	928.491
Lxn	28.4904	-1.02e-05	0.00144268	0.0409047	0.497735	30.1659	27.1479	40.0212	23.1152	25.1522	33.8218	49.3287	26.7403	24.9126	20.8453	24.999	24.3592	21.6197	26.637
Acox3	740.374	-2.11e-05	0.00144262	0.0408942	0.497735	739.064	891.703	755.6	809.031	758.536	769.001	832.983	755.251	543.682	648.522	597.119	751.074	719.629	794.037
Nbl1	22.3949	4.34e-06	0.00144269	0.0409506	0.497739	17.0503	17.7505	4.80254	19.559	14.5618	8.90048	23.5433	13.0441	13.189	82.2233	14.2851	10.8263	50.9608	22.8317
Cdan1	213.367	1.72e-05	0.00144269	0.0410431	0.498445	232.146	213.006	202.507	145.803	141.646	194.03	195.073	321.536	196.37	266.357	212.849	220.586	177.591	267.639
1810013D10Rik	505.08	1.8e-05	0.00144268	0.0413082	0.498732	468.883	504.324	455.441	531.649	387.873	392.808	421.536	405.67	703.416	548.927	720.685	618.452	447.838	463.611
1700030J22Rik	15.6959	5.23e-06	0.00144269	0.0413012	0.498732	19.0176	8.35319	21.6114	7.11236	6.61899	9.49384	10.09	24.1315	21.9817	16.213	17.1422	27.0657	6.17707	24.7344
Gm12718	37.3162	-2.73e-06	0.00144269	0.0412279	0.498732	4.59046	11.4856	16.8089	78.236	66.1899	147.155	59.4187	9.13084	5.8618	20.8453	44.2839	9.47301	43.2395	5.70793
Sebox	33.0156	-4.31e-06	0.00144269	0.0411541	0.498732	13.7714	7.30904	15.2081	144.025	71.4851	44.5024	21.301	9.78305	30.7744	18.5292	39.9984	20.2993	16.9869	8.24479
Atp2b1	1053.86	-1.17e-05	0.00144268	0.0412424	0.498732	1052.53	1068.16	1079.77	1482.93	1341.01	1193.85	1169.32	1188.97	572.991	916.037	507.122	857.984	1152.02	1171.39
Prps2	663.334	-1.66e-05	0.00144256	0.0412835	0.498732	621.024	712.11	712.377	634.778	816.784	729.839	711.903	583.722	549.544	580.195	600.69	713.182	696.465	624.067
Zfp292	1028.71	-2.54e-05	0.00144277	0.0412234	0.498732	758.082	801.906	960.509	1424.25	1223.19	1501.21	1502.28	794.383	759.103	1061.95	869.965	764.607	1241.59	738.86
Tspan12	5027.72	2.39e-05	0.00144273	0.0415557	0.499097	4200.27	5279.22	4945.02	6706.96	6719.6	6092.67	4892.51	3971.92	4844.78	4074.11	3503.43	5062.65	6033.45	4061.51
Rab24	611.579	2.16e-05	0.00144262	0.0416391	0.499097	605.285	597.253	551.492	625.888	484.51	566.664	554.948	652.855	710.743	553.559	776.397	694.236	602.264	586.015
Xpa	230.605	1.98e-05	0.00144266	0.0417099	0.499097	233.458	267.302	198.505	224.039	190.627	181.57	184.983	284.361	241.799	228.141	273.56	267.951	202.299	249.881
Ces3b	7245.58	1.47e-05	0.00144272	0.0416534	0.499097	5102.62	5362.75	10390.3	11349.6	8286.98	8636.43	11896.1	2679.25	6088.94	7770.68	9177.49	5861.09	6473.57	2362.45
Dtx3	111.715	1.2e-05	0.00144267	0.041536	0.499097	118.696	113.812	78.4415	126.244	76.7803	80.1043	95.2941	139.571	84.9961	103.069	141.423	110.97	129.718	164.896
Mum1	135.346	1.07e-05	0.00144268	0.0414215	0.499097	139.681	137.828	126.467	78.236	82.0755	122.827	125.564	181.312	128.96	133.179	192.135	177.281	80.3019	188.996
Serpina6	3586.41	-6.6e-06	0.00144269	0.0414192	0.499097	3783.85	1623.65	3259.33	4896.86	7172.34	3372.09	6513.63	2840.34	1220.72	1769.54	3844.84	2549.59	4731.64	2631.36
Map3k8	90.1068	-8.19e-06	0.00144268	0.0416122	0.499097	89.8419	46.9867	86.4458	161.806	142.97	131.134	82.9619	57.3939	93.7888	69.4845	68.5687	50.0716	109.643	70.3979
Gm15408	166.863	-8.98e-06	0.00144268	0.0415232	0.499097	137.058	143.048	136.872	256.045	248.874	263.454	171.529	111.527	152.407	78.749	144.994	154.275	219.286	117.964
Sepsecs	717.357	-1.73e-05	0.00144264	0.0417179	0.499097	657.092	726.728	825.237	577.88	741.327	972.526	945.094	652.855	597.904	711.058	623.546	637.398	699.553	674.805
Ube2k	902.031	-2.81e-05	0.00144257	0.0416037	0.499097	900.386	951.22	994.126	976.172	1007.41	965.998	859.889	931.998	855.823	802.545	777.826	910.762	772.134	922.149
Pcf11	1013.1	-1.71e-05	0.00144264	0.041862	0.500406	875.466	1032.66	978.118	1173.54	1065.66	1407.46	1158.1	1051.35	895.39	919.511	759.969	859.337	1087.16	919.612
Adam33	26.5309	7.48e-06	0.00144268	0.0419394	0.500918	18.3618	24.0154	21.6114	17.7809	15.8856	18.9877	34.7543	23.4793	43.9635	31.268	49.2837	27.0657	13.8984	31.0765
Snx15	265.159	1.26e-05	0.00144267	0.0420794	0.501286	280.674	267.302	238.526	231.152	226.37	182.756	211.889	234.141	348.777	283.728	422.84	331.555	225.463	227.049
Gdf15	1815.5	2.42e-06	0.00144269	0.0420879	0.501286	523.968	487.618	406.615	1662.51	223.722	236.753	2956.36	1282.88	433.773	2421.53	3388.43	550.788	9821.54	1020.45
Agpat6	4531.24	-8.95e-06	0.00144267	0.0420304	0.501286	4330.77	3312.04	4731.31	7462.65	6600.46	4367.76	5353.29	3115.57	3546.39	3996.51	3816.99	3551.02	6241.93	3010.62
Csk	1097.69	-0.000121058	0.00144517	0.0421089	0.501286	1103.68	1132.9	1066.97	837.481	994.172	886.488	945.094	1341.58	1211.93	1209.03	1232.81	1315.39	744.337	1345.8
Acbd4	1699.48	5.63e-06	0.00144268	0.042176	0.501672	1470.26	1666.46	1485.59	1273.11	1296	1453.74	1059.45	1109.4	3059.86	2023.16	3587	2108.42	1190.63	1009.67
Tinf2	181.715	2.05e-05	0.0014427	0.0425128	0.502202	186.242	182.726	164.087	119.132	170.77	120.453	200.678	209.357	208.094	186.45	244.276	189.46	160.604	201.68
Tbrg1	847.106	1.98e-05	0.00144264	0.042369	0.502202	912.19	879.173	749.197	816.144	685.727	684.15	752.263	841.342	1011.16	1030.69	938.534	987.899	721.173	849.848
Dnttip1	114.562	1.83e-05	0.00144264	0.0423317	0.502202	118.696	106.503	95.2504	106.685	112.523	96.1252	102.021	134.354	109.909	145.917	121.424	128.562	114.276	111.622
4930414L22Rik	73.9851	1.29e-05	0.00144267	0.0425571	0.502202	74.7589	76.2229	70.4373	51.5646	39.7139	61.1166	79.5986	71.0901	93.7888	79.9071	92.1391	92.0235	84.9347	68.4952
Map3k10	707.724	1.16e-05	0.00144268	0.042383	0.502202	763.328	648.417	620.328	649.003	566.586	547.083	497.772	570.025	1081.5	799.071	1216.38	803.852	603.809	540.985
Hddc3	41.5099	9.05e-06	0.00144268	0.0424529	0.502202	38.0352	49.075	48.8259	23.1152	22.5046	34.4152	23.5433	48.263	58.618	53.2714	54.9978	62.2512	29.3411	34.8818
Pcdhga11	5.95766	4.6e-06	0.00144269	0.0425678	0.502202	5.90202	1.04415	6.40339	1.77809	7.94279	2.96683	2.24221	7.82644	10.2581	6.94845	5.71406	2.70657	7.72134	13.9527
Arl4d	1466.25	3.05e-06	0.00144269	0.0424958	0.502202	426.257	983.588	518.675	1168.21	1239.08	995.667	899.128	545.242	650.66	1432.54	2703.46	848.511	7586.99	529.569
Csnk1g3	1096.69	-9.54e-06	0.00144268	0.0425205	0.502202	922.027	1008.65	930.093	1411.8	1664.01	1645.4	1234.34	780.687	794.274	786.332	737.113	863.397	1697.15	878.388
Pon3	1730.77	-2.89e-05	0.00144255	0.042305	0.502202	1914.22	1841.88	1760.93	1742.53	1919.51	1718.98	1831.89	1686.6	1535.79	1569.19	1486.37	1553.57	1862.39	1806.88
Tmem170	305.89	1.15e-05	0.00144267	0.0426044	0.502225	340.35	341.437	349.785	197.368	211.808	210.645	213.01	296.752	435.239	387.955	374.985	345.088	239.361	338.671
Pex14	1636.93	1.49e-05	0.00144263	0.0426869	0.502378	1614.53	1464.94	1424.75	1758.53	1476.04	1254.37	1513.49	1545.72	2102.92	1899.24	2023.49	1951.44	1462.42	1425.08
Gm7694	396.791	-7.12e-06	0.00144269	0.0426654	0.502378	382.975	219.271	413.019	412.517	1090.81	391.621	441.716	432.411	221.283	226.983	213.563	420.872	276.424	411.605
Tfb2m	742.24	3.19e-05	0.00144275	0.0428031	0.503137	687.913	669.3	786.016	976.172	930.63	801.043	741.052	591.548	700.485	682.106	654.259	798.439	713.452	658.949
4930422G04Rik	17.7569	8.26e-06	0.00144268	0.0428209	0.503137	16.3945	12.5298	17.6093	12.4466	5.29519	17.801	17.9377	24.1315	23.4472	22.0034	19.9992	10.8263	24.7083	23.466
9830147E19Rik	244.649	-3.81e-06	0.00144263	0.0429005	0.503663	196.078	264.17	292.955	220.483	285.94	370.26	261.218	223.706	268.177	243.196	211.42	228.705	172.958	185.825
Airn	33.453	5.35e-06	0.00144269	0.0429387	0.503703	32.1332	49.075	33.6178	12.4466	7.94279	9.49384	15.6955	97.8305	41.0326	13.8969	25.7132	35.1855	20.0755	74.2031
Map2k4	1226.28	-2.12e-05	0.00144262	0.0429962	0.503968	1162.04	1266.55	1279.08	1578.94	1387.34	1183.76	1328.51	1155.7	964.266	1198.61	992.103	1120.52	1283.29	1267.16
Srms	22.4231	4.5e-06	0.00144269	0.043099	0.504037	13.7714	10.4415	22.4119	0	25.1522	13.054	22.4221	22.8271	36.6362	54.4295	32.8558	36.5387	3.08854	20.2949
Mmaa	426.507	-8.32e-06	0.00144262	0.0431415	0.504037	401.993	408.262	469.849	460.526	573.205	502.58	445.08	315.666	457.22	333.525	469.981	449.291	370.624	313.302
Diap2	612.028	-1.07e-05	0.00144267	0.0430448	0.504037	619.712	699.58	577.906	649.003	759.86	707.885	789.26	600.679	350.243	443.542	387.127	523.722	727.35	732.518
Enpep	1376.51	-1.09e-05	0.00144268	0.0431332	0.504037	1177.13	1116.2	1567.23	1356.68	2010.85	1632.35	2089.74	1464.2	737.121	1050.37	902.821	1216.6	1587.51	1362.29
Coq10b	1591.81	-8.09e-06	0.0014427	0.0431936	0.504239	1047.94	1116.2	1395.14	3794.45	2104.84	2735.41	1905.88	614.375	797.205	774.752	1142.1	878.283	3403.57	575.233
Grm8	16.9031	-3.9e-06	0.00144269	0.0432642	0.504249	6.5578	11.4856	12.0064	35.5618	11.9142	61.1166	20.1799	3.26102	7.32725	11.5807	17.8564	10.8263	23.164	3.80529
Sec16b	2065.03	-2.48e-05	0.00144267	0.0432432	0.504249	1837.5	1846.06	1992.25	2140.82	2566.84	2477.89	2694.02	2121.62	1770.26	1801.96	2004.92	1875.66	1836.13	1944.5
Tspyl5	29.7553	8.82e-06	0.00144268	0.0433659	0.505027	34.1006	32.3686	33.6178	16.0028	19.857	18.3943	16.8166	26.7403	39.5671	35.9003	43.5697	41.9519	24.7083	32.9792
Racgap1	6.81971	4.46e-06	0.00144269	0.0435324	0.506152	5.90202	3.13245	6.40339	3.55618	3.97139	2.37346	7.84775	15.0007	7.32725	5.79037	6.42831	1.35329	9.26561	17.1238
Pisd-ps1	2892.36	-3.5e-05	0.00144286	0.0435159	0.506152	2558.2	2960.16	2563.76	2174.61	1931.42	3014.3	2458.59	3487.98	3710.52	2837.28	5147.65	2927.16	1993.65	2727.76
Jmy	1285.55	-1.95e-05	0.00144256	0.0436204	0.506767	1213.85	1282.21	1390.34	1310.45	1356.89	1476.89	1509.01	1280.27	1091.76	1273.88	1022.82	1174.65	1348.15	1266.53
4430402I18Rik	23.631	3.41e-06	0.00144268	0.0437047	0.507339	11.804	25.0596	21.6114	14.2247	15.8856	24.328	20.1799	23.4793	39.5671	22.0034	44.2839	31.1256	16.9869	20.2949
Morc2a	435.253	-1.53e-05	0.00144265	0.0438059	0.508106	431.503	408.262	524.278	460.526	475.244	471.725	560.554	535.459	318.003	348.58	352.129	376.214	370.624	460.44
4930545L23Rik	4.687	-3.7e-06	0.00144269	0.0439012	0.508752	8.52514	12.5298	8.00424	0	3.97139	7.12038	3.36332	2.60881	4.39635	2.31615	4.9998	4.05986	3.08854	0.634215
Dnaja1	3594.68	-2.84e-05	0.00144281	0.0439319	0.508752	2428.35	2788.92	3183.29	5536.97	6207.29	5773.44	3333.05	2432.07	3326.57	2617.25	3142.02	3036.78	4408.88	2110.67
Tti2	215.93	-1.97e-05	0.00144263	0.0440463	0.509668	211.161	224.492	233.724	213.371	234.312	274.135	232.069	210.662	215.421	191.082	177.136	217.879	163.692	223.878
Trim33	680.132	-2.07e-05	0.00144263	0.0441182	0.510093	638.074	691.227	680.36	743.242	741.327	871.653	737.689	619.593	514.373	639.257	582.834	619.805	775.222	667.194
Tmem127	1948.15	4.59e-05	0.00144286	0.0446136	0.510616	1933.9	1852.32	2025.07	1577.17	1822.87	1866.13	1723.14	1961.17	2217.23	2360.16	2170.63	2115.19	1735.76	1913.43
Loh12cr1	263.819	1.86e-05	0.00144266	0.0442505	0.510616	289.199	240.154	272.945	197.368	243.579	215.985	224.221	268.055	306.279	328.893	308.559	324.789	225.463	247.978
Rap1gap	201.714	1.4e-05	0.00144265	0.0443596	0.510616	175.749	238.066	193.703	140.469	131.056	214.205	180.498	232.836	216.887	240.879	213.563	189.46	237.817	218.804
Dpm2	292.843	1.4e-05	0.00144266	0.0445631	0.510616	278.706	247.463	259.337	273.826	258.141	254.554	264.581	235.445	397.137	301.099	428.554	387.04	253.26	260.662
4933417G07Rik	462.95	1.31e-05	0.00144267	0.044578	0.510616	406.584	444.807	360.191	497.865	377.283	399.928	392.388	371.756	688.761	554.718	660.688	488.537	486.444	351.355
Ushbp1	313.191	1.26e-05	0.00144265	0.0445151	0.510616	245.917	255.817	278.548	316.5	299.178	308.55	271.308	386.104	402.999	354.371	419.269	282.837	210.02	353.258
Nr1i3	4676.49	1.07e-05	0.00144268	0.0445666	0.510616	3815.98	5062.03	3665.14	3902.91	3931.68	4347.59	3602.12	6503.77	5718.19	4103.06	7009	6466	2477.01	4866.33
Recql4	51.5417	7.64e-06	0.00144267	0.0443877	0.510616	45.2488	50.1192	58.4309	32.0056	22.5046	40.3488	60.5398	69.7857	45.4289	55.5876	65.7116	69.0176	47.8723	58.982
Noxred1	4.52312	-4.14e-06	0.00144269	0.0446578	0.510616	10.4925	6.26489	8.00424	5.33427	5.29519	7.12038	1.12111	3.26102	2.9309	0	4.9998	4.05986	0	4.4395
Pcdhb22	10.4115	-5.28e-06	0.00144269	0.0442929	0.510616	20.985	14.6181	14.4076	10.6685	7.94279	8.90048	14.5744	11.0875	8.7927	10.4227	0.714257	5.41315	7.72134	9.51322
Pik3ca	1183.02	-1.75e-05	0.00144264	0.0445996	0.510616	1217.13	1207.04	1210.24	1266	1525.02	1354.06	1185.01	1249.62	855.823	1023.74	858.537	1180.07	1127.32	1302.68
Zmym5	1294	-1.93e-05	0.00144266	0.0446518	0.510616	996.13	1318.76	1281.48	1598.5	1486.63	1810.36	1352.06	1112.01	1137.19	1171.97	1225.66	1246.38	1345.06	1033.77
Hrsp12	9800.2	-3.18e-05	0.00144281	0.044558	0.510616	9081.9	9440.15	10510.4	12267	13701.3	11688.7	9228.96	7167.71	6698.57	9331.76	8869.64	9076.49	12669.2	7471.05
D14Abb1e	1607.83	-0.000271826	0.00145581	0.0445276	0.510616	1360.74	1838.75	1894.6	1251.78	1671.96	2422.12	1843.1	1479.2	1453.73	1438.33	1417.8	1446.66	1572.06	1418.74
Elane	6.39458	3.33e-06	0.00144269	0.04475	0.510863	8.52514	8.35319	3.2017	0	2.6476	1.18673	3.36332	5.86983	11.7236	8.10652	11.4281	16.2394	0	8.87901
Eno4	6.01695	-4.35e-06	0.00144269	0.0447163	0.510863	5.90202	16.7064	5.60297	8.89045	6.61899	4.74692	7.84775	7.17423	1.46545	3.47422	1.42851	8.11972	3.08854	3.17107
Pttg1ip	5549.28	2.4e-05	0.0014426	0.0448864	0.511211	5397.07	5546.52	5646.19	5467.63	4945.71	4440.15	5060.68	5555.47	6071.36	5869.12	6687.59	6407.81	4932.39	5662.27
Tspan14	657.555	1.83e-05	0.00144264	0.0448555	0.511211	716.767	652.593	656.348	526.315	630.128	472.912	581.855	604.592	763.499	675.157	754.255	829.565	648.592	693.197
Ranbp3	572.109	-4.98e-05	0.00144303	0.0448184	0.511211	543.642	510.589	488.259	565.433	540.11	484.186	521.315	590.896	691.692	533.872	877.107	631.985	492.621	537.814
Gsdmd	525.16	7.68e-06	0.00144265	0.0450078	0.51137	406.584	511.633	433.029	467.638	411.701	569.631	468.623	466.325	619.885	658.944	852.108	600.859	454.015	431.266
2810001G20Rik	87.8253	6.8e-06	0.00144269	0.0449797	0.51137	75.4147	116.945	75.2398	56.8989	54.2757	72.9839	30.2699	50.8718	143.614	149.392	148.565	132.622	57.1379	65.3241
Kansl1	862.608	-1.51e-05	0.00144266	0.0450027	0.51137	774.476	742.39	850.851	958.391	1225.84	1086.45	980.969	931.346	652.125	706.425	675.687	726.715	872.511	892.34
Nr2c1	324.894	-1.51e-05	0.00144266	0.0450418	0.51137	318.053	319.51	336.978	384.068	377.283	371.447	394.63	352.19	205.163	295.309	207.849	320.729	319.663	345.647
Rnf111	621.822	-1.2e-06	0.00144257	0.0450871	0.511482	506.262	652.593	613.925	695.234	706.908	761.881	751.142	665.247	531.958	569.773	519.979	519.662	608.441	602.504
Fgfr1op	399.459	-2.32e-05	0.0014426	0.0451803	0.511766	404.616	426.013	441.834	394.736	397.139	485.373	414.81	341.102	405.93	339.316	413.555	338.322	412.319	377.358
Psmc4	861.987	-5.12e-05	0.00144306	0.0451828	0.511766	836.775	771.626	736.39	812.587	803.546	650.922	877.827	835.472	1184.08	904.456	1140.67	1032.56	735.071	745.837
Phf20l1	1898.08	2.91e-05	0.00144281	0.0454883	0.513308	1279.43	1717.63	1804.16	2734.7	2745.56	3014.3	1956.33	1205.92	2023.79	1548.35	1402.09	1575.23	2407.51	1158.08
Eif2d	500.374	2.06e-05	0.00144266	0.0456239	0.513308	483.966	545.046	466.647	440.967	468.625	388.654	428.263	459.803	634.54	502.604	651.402	575.147	486.444	473.124
Ptcd3	480.221	6.6e-06	0.00144262	0.0454579	0.513308	411.174	463.602	457.042	622.332	611.595	586.245	516.831	412.845	361.966	389.113	437.839	480.417	563.658	408.434
Gm6531	10.0091	5.45e-06	0.00144269	0.0453685	0.513308	5.90202	11.4856	5.60297	8.89045	2.6476	7.12038	10.09	9.13084	17.5854	17.3711	22.142	10.8263	3.08854	8.24479
BC068157	17.8236	4.26e-06	0.00144269	0.045608	0.513308	17.0503	18.7947	16.0085	17.7809	2.6476	13.6474	8.96886	30.0013	11.7236	20.8453	19.2849	21.6526	9.26561	41.8582
Fdxr	275.01	-6.65e-06	0.00144265	0.0454287	0.513308	241.983	263.126	236.125	359.174	299.178	352.459	395.751	307.84	193.439	195.715	297.845	238.178	213.109	256.223
Zfp770	367.392	-1.5e-05	0.00144266	0.0455513	0.513308	434.782	450.028	492.261	309.388	362.721	418.916	346.422	313.71	381.017	369.426	283.56	353.208	242.45	385.603
Rbm48	171.573	-1.61e-05	0.00144266	0.0454976	0.513308	144.927	186.903	156.083	199.146	198.57	205.304	223.1	174.79	153.872	165.605	116.424	158.335	155.971	162.993
Tspan33	212.3	-3.58e-05	0.0014429	0.0456384	0.513308	150.174	206.742	153.681	236.486	152.237	164.362	125.564	129.136	334.123	451.649	334.272	284.19	129.718	119.867
Cbx7	339.364	1.06e-05	0.00144266	0.0457392	0.514042	330.513	349.79	340.18	245.377	239.607	285.409	307.183	331.971	366.362	435.436	523.55	447.938	243.994	303.789
Olfr920	6.71057	-4.64e-06	0.00144269	0.0458077	0.514412	5.90202	5.22075	7.20381	14.2247	10.5904	7.71375	8.96886	1.30441	4.39635	4.6323	3.57128	4.05986	12.3541	3.80529
Eftud2	279.535	2.49e-05	0.00144266	0.0464485	0.514848	270.837	246.419	227.32	248.933	301.826	256.334	270.187	286.317	263.781	324.261	355.7	311.256	279.512	270.81
Snapin	556.393	1.63e-05	0.00144267	0.046595	0.514848	584.3	674.52	549.091	407.183	353.454	420.103	515.709	686.118	611.093	530.398	566.406	664.464	554.392	672.268
Vimp	571.063	1.47e-05	0.00144266	0.0463634	0.514848	570.529	642.152	429.828	663.228	472.596	404.082	417.052	560.895	553.94	756.222	682.83	691.53	622.34	527.667
Zfp354a	223.237	1.41e-05	0.00144266	0.0462124	0.514848	177.716	227.624	225.72	204.48	186.656	201.151	177.135	234.793	300.417	243.196	291.417	293.663	148.25	213.096
Pusl1	105.407	1.41e-05	0.00144268	0.0465534	0.514848	105.581	82.4878	98.4521	85.3484	101.932	77.1375	97.5363	116.744	140.683	106.543	179.993	109.616	88.0233	85.619
Frat1	331.349	1.37e-05	0.0014427	0.0468	0.514848	344.94	277.744	325.773	208.037	304.474	251.587	263.46	242.62	529.027	523.45	483.552	385.687	223.919	274.615
Fam203a	144.959	1.24e-05	0.00144267	0.0467436	0.514848	148.862	130.519	136.072	124.466	127.085	111.553	115.474	123.919	234.472	149.392	190.707	193.52	112.732	130.648
Snx24	227.486	1.08e-05	0.00144264	0.0464211	0.514848	215.096	207.786	188.9	279.16	221.074	162.582	170.408	263.49	221.283	266.357	189.992	272.011	239.361	287.299
Zfp692	121.323	1.06e-05	0.00144266	0.0468076	0.514848	100.99	120.077	101.654	128.023	80.7517	123.42	102.021	141.528	161.199	137.811	174.993	123.149	84.9347	117.964
Mks1	38.2434	9.76e-06	0.00144268	0.0465708	0.514848	36.0679	39.6777	26.414	39.118	19.857	30.855	38.1177	47.6108	38.1017	50.9553	55.712	52.7782	27.7968	32.345
Adck1	365.182	7.16e-06	0.00144263	0.0462506	0.514848	343.629	300.715	348.985	312.944	352.13	317.45	329.606	335.885	467.479	445.859	524.979	427.639	324.296	280.957
Alg2	557.048	5.77e-06	0.00144267	0.0459425	0.514848	565.938	655.726	624.331	376.955	340.216	317.45	387.903	703.075	700.485	944.989	489.266	707.769	310.398	674.17
Dnajc12	262.31	5.62e-06	0.00144269	0.0466171	0.514848	209.85	182.726	176.894	188.478	283.293	186.91	159.197	91.9606	687.296	288.36	559.263	353.208	183.768	121.135
Cenpb	6213.3	3.3e-09	0.00144265	0.0467103	0.514848	5789.88	5409.74	5696.62	5954.83	5225.03	5279.76	4769.19	5055.88	9874.2	7167.32	9994.6	6905.82	5471.34	4391.94
F730035M05Rik	8.04464	-1.92e-06	0.00144269	0.0467993	0.514848	2.62312	3.13245	5.60297	19.559	5.29519	14.8341	26.9066	5.86983	2.9309	1.15807	1.42851	6.76643	10.8099	5.70793
Ugp2	9124.42	-3.14e-06	0.00144266	0.0465753	0.514848	8919.26	10891.5	9098.42	11598.5	10315	9738.31	11680.8	8736.26	4831.59	6497.95	5358.36	7798.99	12527.1	9749.79
Lgi4	7.48628	-4.39e-06	0.00144269	0.0461113	0.514848	4.59046	7.30904	4.80254	12.4466	9.26659	18.3943	11.2111	1.30441	7.32725	4.6323	8.57108	4.05986	7.72134	3.17107
Col10a1	7.47081	-5.36e-06	0.00144269	0.0465876	0.514848	6.5578	6.26489	16.0085	7.11236	9.26659	11.2739	8.96886	7.82644	7.32725	8.10652	3.57128	5.41315	3.08854	3.80529
Fam86	238.649	-5.83e-06	0.00144265	0.0466677	0.514848	254.443	257.905	206.509	209.815	172.094	180.383	186.104	209.357	347.312	275.622	361.414	288.25	180.679	211.194
Fsd1l	29.9822	-6.81e-06	0.00144269	0.0463486	0.514848	19.6734	20.883	36.0191	40.8961	56.9233	54.5896	24.6644	26.0881	30.7744	20.8453	29.2845	9.47301	29.3411	20.2949
Rdh19	28.3218	-7.84e-06	0.00144268	0.046431	0.514848	36.0679	28.192	46.4246	21.3371	35.7426	28.4815	32.5121	12.3919	32.2399	33.5842	17.1422	20.2993	32.4296	19.6607
Prex2	431.002	-8.09e-06	0.00144268	0.0460941	0.514848	313.463	373.805	596.316	478.306	472.596	644.988	588.581	219.14	487.995	370.584	424.269	305.843	512.697	245.441
9330175E14Rik	24.8492	-8.93e-06	0.00144268	0.046692	0.514848	22.2965	37.5894	21.6114	28.4495	37.0664	34.4152	23.5433	26.7403	17.5854	16.213	19.9992	20.2993	15.4427	26.637
Mars2	138.729	-1.41e-05	0.00144267	0.0463812	0.514848	163.289	146.181	209.711	99.5731	137.675	153.682	161.439	122.614	105.512	134.337	108.567	123.149	120.453	156.017
Taok1	2710.64	-1.42e-05	0.00144266	0.0465474	0.514848	2334.58	2793.1	2829.5	2752.48	3248.6	3641.48	3243.36	2679.25	1946.12	2280.25	1844.93	2295.17	3182.74	2877.43
Zfp866	409.622	-1.59e-05	0.00144265	0.0467073	0.514848	455.111	462.558	500.265	332.503	463.329	478.252	429.384	459.151	388.344	354.371	325.701	370.801	277.968	436.974
Apba3	775.572	-2.57e-05	0.00144273	0.046505	0.514848	736.441	602.474	784.415	713.014	738.679	709.071	632.305	671.769	992.11	862.765	1109.96	952.714	682.566	669.731
Gpc4	1196.03	-1.87e-05	0.00144262	0.0468843	0.5153	1185.65	1124.55	1254.26	1296.23	1486.63	1209.28	1429.41	1153.09	954.008	1269.25	879.25	1106.99	1241.59	1154.27
Zfp654	806.165	6.52e-05	0.0014434	0.0469356	0.515471	588.89	691.227	842.846	1209.1	1127.88	1202.75	784.775	513.284	782.55	704.109	634.974	714.535	1034.66	454.732
Pcmtd2	1468.03	-2.24e-05	0.00144271	0.0469888	0.515664	1072.86	1697.79	1662.48	1397.58	1724.91	2196.04	1542.64	1230.71	1364.33	1170.81	1174.24	1385.77	1660.09	1272.24
Ctnnb1	4818.62	-4.17e-05	0.00144293	0.0470813	0.516288	4979.34	4819.79	4828.96	5494.3	6379.38	5922.97	4700.8	4528.9	3199.08	4613.77	3013.45	4311.57	5672.1	4996.35
Atg4d	707.565	9.88e-06	0.00144268	0.0471596	0.516755	570.529	537.737	658.749	697.012	628.804	596.332	545.979	477.413	1188.48	850.026	1242.09	797.086	625.428	490.248
Slc1a2	8142.1	-1.39e-05	0.00144266	0.0472801	0.517683	8317.26	9004.74	9292.92	9479	7811.73	8905.82	9962.16	9805.87	5428.03	5381.57	5904.05	8156.26	7596.25	8943.7
Zfp507	587.906	1.3e-05	0.00144261	0.0475092	0.51834	556.101	560.708	716.379	581.436	610.271	643.208	767.959	643.724	505.58	590.618	460.696	522.369	481.812	589.82
Vwa1	39.6055	6.24e-06	0.00144268	0.0474788	0.51834	19.6734	41.766	42.4225	35.5618	22.5046	33.8218	25.7855	25.4359	57.1525	42.8487	75.7112	59.5446	49.4166	22.8317
Ppp4r2	1167.25	-7.65e-07	0.0014426	0.0474945	0.51834	1051.22	1080.69	1210.24	1303.34	1535.61	1482.23	1192.86	917.65	1154.77	1130.28	934.962	1000.08	1354.32	993.181
Bach2	231.566	-9.07e-06	0.00144268	0.0475193	0.51834	281.33	436.454	205.709	202.702	370.664	191.064	184.983	261.533	153.872	173.711	166.422	150.215	214.653	248.612
Zfp871	4299.42	-9.9e-06	0.00144266	0.0474952	0.51834	3621.22	4364.54	4394.33	4214.08	5438.16	5806.67	5823.03	4187.14	2746.25	3319.04	2765.6	3540.2	5392.58	4579.03
Ctxn1	14.0707	-6.37e-06	0.00144269	0.0475684	0.518443	14.4272	16.7064	16.0085	21.3371	14.5618	17.801	21.301	11.0875	11.7236	5.79037	12.1424	13.5329	1.54427	19.0264
Lrp2bp	25.3128	-7.84e-06	0.00144268	0.0476362	0.518443	16.3945	28.192	21.6114	37.3399	33.095	34.4152	39.2388	26.0881	16.1199	20.8453	17.8564	23.0059	15.4427	24.7344
Slco3a1	102.052	-9.97e-06	0.00144267	0.0476251	0.518443	118.696	76.2229	93.6496	144.025	116.494	153.682	109.869	86.743	80.5997	99.5944	87.1393	46.0118	105.01	110.988
Bcat2	824.002	2.39e-06	0.00144267	0.0478017	0.519852	800.707	948.087	790.819	492.531	571.881	727.466	533.647	1060.48	1192.88	973.94	1196.38	1032.56	362.903	851.751
Chkb	36.5983	8.99e-06	0.00144268	0.0478498	0.519984	32.789	35.5011	31.2165	37.3399	26.476	31.4484	23.5433	35.8712	41.0326	35.9003	62.8546	50.0716	41.6952	26.637
Ints7	260.729	-1.45e-05	0.00144266	0.0479615	0.520417	256.41	243.287	281.749	229.374	311.093	281.848	400.235	275.882	221.283	272.147	191.421	205.7	225.463	254.32
BC003331	1269.82	-1.98e-05	0.00144264	0.0479262	0.520417	1144.99	1340.69	1293.48	1514.93	1490.6	1615.73	1142.41	1108.75	1314.51	1182.39	1089.96	1199.01	1337.34	1002.69
Wbscr27	318.488	3.94e-05	0.0014429	0.0484099	0.520779	384.287	375.894	275.346	280.938	232.988	214.798	232.069	399.8	353.173	282.57	355.7	354.561	330.473	386.237
Dnttip2	839.495	2.22e-05	0.00144269	0.0494053	0.520779	734.474	819.657	855.653	897.936	1129.2	1119.09	843.073	694.596	836.772	895.191	763.541	722.655	860.157	580.941
Dusp22	558.842	2.06e-05	0.00144262	0.0493393	0.520779	633.483	569.061	516.273	490.753	496.424	466.978	471.986	535.459	587.645	584.827	678.544	665.817	551.304	575.233
Patz1	182.808	1.9e-05	0.00144264	0.048751	0.520779	146.895	167.064	184.097	156.472	180.037	156.055	192.83	204.792	208.094	224.666	171.422	207.053	157.515	202.315
Snx1	235.095	1.67e-05	0.00144264	0.0493704	0.520779	194.767	231.801	224.119	188.478	207.836	236.159	218.616	221.749	303.348	272.147	292.845	258.478	253.26	187.728
Isy1	168.732	1.67e-05	0.00144264	0.0485374	0.520779	172.47	162.887	154.482	115.576	176.065	145.968	147.986	172.182	212.49	151.708	184.993	220.586	183.768	161.091
Kcnn1	221.739	1.42e-05	0.00144266	0.0485861	0.520779	224.933	209.874	246.531	168.919	180.037	182.163	179.377	203.487	265.246	279.096	263.561	315.316	182.224	203.583
Gpr39	94.5995	1.18e-05	0.00144269	0.0483272	0.520779	114.106	114.856	80.8428	49.7865	58.2471	49.2493	94.173	135.006	93.7888	98.4363	87.1393	100.143	106.554	142.064
Nubp1	384.744	1.03e-05	0.00144267	0.0486932	0.520779	352.154	376.938	337.779	364.509	305.797	306.176	293.73	287.622	657.987	392.587	638.546	420.872	353.637	298.081
Tab1	112.846	9.94e-06	0.00144268	0.0481088	0.520779	127.221	120.077	98.4521	99.5731	50.3043	74.764	107.626	127.18	159.734	149.392	131.423	139.389	71.0363	123.672
Nt5c3l	31.9226	9.87e-06	0.00144268	0.0491028	0.520779	26.2312	35.5011	28.0148	30.2275	23.8284	28.4815	19.0588	29.3491	36.6362	49.7972	43.5697	24.3592	40.151	31.7107
Dll4	81.0328	9.17e-06	0.00144268	0.048823	0.520779	98.367	67.8697	82.4437	56.8989	38.3901	77.7308	52.692	73.0467	117.236	138.969	104.996	56.838	72.5806	96.4007
Gm3230	25.8515	9.16e-06	0.00144268	0.0492413	0.520779	25.5754	25.0596	22.4119	23.1152	18.5332	27.2948	8.96886	30.0013	39.5671	26.6357	32.8558	20.2993	32.4296	29.1739
Aim2	36.2559	8.74e-06	0.00144268	0.0495252	0.520779	37.3795	37.5894	30.4161	16.0028	27.7998	37.9754	25.7855	42.3932	46.8944	39.3745	47.141	23.0059	57.1379	38.6871
Fgd2	58.4823	8.59e-06	0.00144269	0.0492264	0.520779	64.2664	75.1787	51.2271	26.6714	30.4474	46.8758	42.6021	90.6562	89.3924	50.9553	81.4253	47.365	38.6067	83.0822
Prim2	21.2485	8.44e-06	0.00144268	0.0488464	0.520779	14.4272	16.7064	10.4055	28.4495	23.8284	18.3943	14.5744	21.5227	26.3781	18.5292	24.2847	24.3592	30.8854	24.7344
Gatsl3	33.3746	8.41e-06	0.00144269	0.0485746	0.520779	33.4448	41.766	36.0191	26.6714	7.94279	21.9545	23.5433	57.3939	35.1708	30.1099	37.8556	33.8322	33.9739	47.5661
Rfx4	133.401	7.81e-06	0.00144268	0.0487229	0.520779	120.664	162.887	156.083	44.4523	78.1041	62.8967	142.381	189.139	180.25	173.711	155.708	150.215	95.7446	155.383
Adprhl2	502.919	7.61e-06	0.00144268	0.0481031	0.520779	405.928	475.088	403.414	375.177	522.9	452.144	335.211	326.754	905.648	582.511	870.679	562.967	503.431	319.01
B930041F14Rik	22.0003	6.52e-06	0.00144269	0.0494761	0.520779	32.789	21.9271	20.0106	12.4466	7.94279	13.054	11.2111	37.8278	30.7744	17.3711	20.7135	24.3592	16.9869	40.5898
Apol7e	12.0293	3.93e-06	0.00144269	0.0494215	0.520779	11.1483	11.4856	13.6072	5.33427	2.6476	8.30711	6.72664	9.78305	14.6545	18.5292	29.2845	21.6526	10.8099	4.4395
Trem1	6.35298	-2.02e-06	0.00144269	0.0485589	0.520779	9.8367	3.13245	0.800424	33.7837	3.97139	6.52702	10.09	0	2.9309	1.15807	0	0	15.4427	1.26843
Mt2	7223.22	-2.63e-06	0.00144269	0.0488801	0.520779	3979.93	2796.23	1365.52	33728.6	22343.1	6188.8	3179.46	1760.95	2524.97	1422.12	6126.18	3090.91	10985.9	1632.47
E2f7	17.4727	-3.57e-06	0.00144269	0.0494429	0.520779	7.86936	11.4856	5.60297	26.6714	27.7998	77.7308	10.09	10.4352	8.7927	2.31615	3.57128	16.2394	16.9869	19.0264
Il1r1	4167.89	-5.22e-06	0.00144269	0.0487949	0.520779	2499.83	3952.1	2388.46	8410.37	8173.13	7687.05	3527	1531.37	4305.49	1422.12	3305.58	3682.29	6183.25	1282.38
Dnd1	13.1976	-6.62e-06	0.00144269	0.0486595	0.520779	13.1156	16.7064	18.4097	16.0028	17.2094	21.3611	10.09	16.9573	8.7927	11.5807	7.85683	12.1796	3.08854	11.4159
Chad	124.901	-7.54e-06	0.00144268	0.0493467	0.520779	135.746	175.417	177.694	97.795	112.523	182.756	153.592	203.487	79.1343	82.2233	72.1399	104.203	46.328	125.575
Rbm47	2796.15	-7.71e-06	0.00144268	0.0490921	0.520779	2378.51	2238.66	3360.18	2523.11	3607.35	3069.48	5864.51	3366.67	1244.17	1675.73	1579.94	2032.64	2921.75	3283.33
Myo1e	931.292	-8.28e-06	0.00144269	0.0490904	0.520779	733.162	871.864	677.959	2142.6	1191.42	968.372	1222.01	1023.96	397.137	589.46	449.982	629.278	1301.82	839.066
Cpeb4	518.384	-8.74e-06	0.00144268	0.0486435	0.520779	567.905	403.042	551.492	382.29	786.336	573.784	917.066	532.85	335.588	574.405	306.416	335.615	393.788	596.796
Tifa	452.992	-1.07e-05	0.00144267	0.0487072	0.520779	704.963	653.637	565.099	471.194	365.368	506.14	309.426	446.107	315.072	335.842	520.693	351.855	382.978	413.508
Gne	3698.68	-1.11e-05	0.00144264	0.0495791	0.520779	3765.49	3595.01	3319.36	4553.69	5590.4	3751.25	3766.92	3046.44	3089.17	2801.38	3237.01	3825.74	4365.64	3074.04
Mak16	195.511	-1.14e-05	0.00144253	0.0485455	0.520779	201.98	202.565	220.917	218.705	187.979	213.018	207.405	198.27	193.439	188.766	160.708	179.987	177.591	185.825
Zfp790	302.75	-1.27e-05	0.00144267	0.0483413	0.520779	327.234	351.878	368.195	259.601	381.254	338.218	325.121	337.841	285.763	268.673	214.277	309.903	155.971	314.571
Zfp747	178.155	-1.39e-05	0.00144267	0.0493723	0.520779	191.488	193.168	182.497	209.815	263.436	191.064	144.623	127.18	191.974	152.866	153.565	215.173	135.896	141.43
Dcaf10	937.291	-1.56e-05	0.00144258	0.0494205	0.520779	913.501	890.659	989.324	992.175	1035.21	1027.71	1148.01	921.563	734.19	958.885	757.112	840.391	904.941	1008.4
Gramd3	574.024	-1.57e-05	0.00144265	0.0481733	0.520779	571.84	462.558	548.29	631.222	794.279	719.159	645.758	552.416	413.257	537.346	547.835	598.153	494.166	520.056
Mob3c	562.919	-1.75e-05	0.00144265	0.0494418	0.520779	533.805	468.823	523.477	698.79	717.499	655.669	679.391	578.504	534.889	404.168	526.407	554.848	521.962	482.638
Msl2	913.014	-1.8e-05	0.00144263	0.0492323	0.520779	805.954	920.939	1072.57	849.927	1086.84	1101.29	1039.27	879.17	795.739	946.147	664.973	784.906	889.498	944.98
Prdm4	242.646	-1.96e-05	0.00144262	0.0495546	0.520779	232.146	218.227	304.161	263.157	263.436	255.74	284.761	239.359	256.454	221.192	217.848	205.7	197.666	237.196
Rbm25	1814.68	-2.21e-05	0.0014427	0.0490566	0.520779	1466.32	1865.89	1703.3	2243.95	2230.6	2452.97	1903.64	2074.66	1433.21	1422.12	1516.37	1699.73	1840.77	1551.92
Lats1	1469.63	-2.26e-05	0.0014426	0.0485912	0.520779	1312.87	1557.87	1556.82	1431.36	1632.24	1594.37	1840.86	1513.76	1323.3	1427.91	1190.67	1318.1	1383.66	1491.04
Srek1ip1	314.383	-2.52e-05	0.00144257	0.0495523	0.520779	361.335	314.289	335.378	320.056	320.359	329.318	341.938	325.449	287.228	304.574	284.274	318.022	257.893	301.252
Zmpste24	1747.19	-7.62e-05	0.0014436	0.0485218	0.520779	1572.56	1741.64	1743.32	2080.37	2071.74	2124.84	1908.12	1517.02	1414.16	1568.03	1358.52	1498.09	2211.39	1650.86
Map3k2	1447.2	-1.27e-05	0.00144267	0.0497125	0.521801	1173.19	1414.82	1460.77	1566.5	1989.67	1906.48	1733.23	1238.53	1102.02	1196.29	980.675	1154.35	1921.07	1423.18
Slc37a1	125.656	-1.26e-05	0.00144267	0.0498035	0.522219	149.518	92.9293	122.465	158.25	173.418	165.549	113.232	101.091	117.236	142.443	114.995	117.736	92.6561	97.6691
Ppp1r35	257.383	-1.46e-05	0.0014427	0.0498246	0.522219	246.573	232.845	208.11	236.486	221.074	195.217	181.619	200.879	461.617	284.886	449.982	328.849	199.211	156.017
Nup54	297.609	-1.32e-05	0.00144264	0.0498911	0.522538	293.134	265.214	303.361	311.166	387.873	338.812	372.208	286.317	228.61	217.718	249.99	259.831	367.536	284.763
Nde1	332.19	1.54e-05	0.00144266	0.0500231	0.523206	356.089	363.364	336.178	309.388	215.779	283.035	243.28	401.105	408.861	382.164	344.272	382.98	281.057	343.11
Cyp2a5	9959.42	-1.09e-05	0.00144269	0.0500634	0.523206	9506.19	8941.05	8362.03	12306.2	17651.5	9929.37	14451.1	10883.3	6242.82	3505.49	10908.8	7907.25	10762	8074.82
Hyal1	1465.52	-1.45e-05	0.00144267	0.0500289	0.523206	1389.6	1219.57	1485.59	1605.62	1812.28	1909.45	1913.73	1806.6	1068.31	1301.68	946.39	1305.92	1267.84	1484.7
Tmem30b	1906.52	2.4e-05	0.00144259	0.0503669	0.524683	1895.86	1846.06	1831.37	1906.11	1915.54	1609.21	1576.28	1909	2073.61	2334.68	1776.36	2081.36	1842.31	2093.54
Tpra1	294.61	1.54e-05	0.00144265	0.0504225	0.524683	335.759	308.024	261.739	280.938	207.836	258.707	225.343	333.928	337.053	350.896	353.557	315.316	230.096	325.352
Hdac11	2017.59	1.08e-05	0.00144268	0.0505032	0.524683	2007.34	2447.49	1824.97	1370.91	1339.68	1573.01	1720.9	1789.65	2080.94	1800.81	3741.99	2590.19	2209.85	1748.53
Dact2	411.493	9.87e-06	0.00144269	0.0505675	0.524683	423.634	434.366	396.21	247.155	229.017	232.599	424.9	356.755	716.605	634.625	577.834	476.357	210.02	400.824
Fam171a2	45.8896	9.43e-06	0.00144268	0.0503988	0.524683	51.1508	25.0596	34.4182	33.7837	25.1522	55.7763	44.8443	46.3064	70.3416	64.8522	53.5693	43.3052	46.328	47.5661
Hmga1	23.5905	8.92e-06	0.00144269	0.0502746	0.524683	29.5101	19.8388	21.6114	30.2275	9.26659	14.8341	6.72664	22.8271	24.9126	30.1099	24.2847	28.419	41.6952	26.0028
Cd79b	12.1634	5.01e-06	0.00144269	0.0505458	0.524683	14.4272	12.5298	10.4055	5.33427	2.6476	6.52702	8.96886	10.4352	32.2399	10.4227	23.5705	12.1796	12.3541	8.24479
Zfp41	64.7228	7.33e-07	0.00144268	0.0503319	0.524683	71.48	66.8255	82.4437	8.89045	30.4474	29.6683	50.4498	78.2644	90.8579	89.1717	88.5679	104.203	21.6197	93.2296
B4galnt2	14.5061	-2.87e-06	0.00144269	0.0505664	0.524683	13.1156	16.7064	89.6475	0	7.94279	7.71375	10.09	9.78305	5.8618	3.47422	4.28554	14.8862	3.08854	16.4896
Klhl13	161.54	-1.59e-05	0.00144264	0.0503948	0.524683	159.355	163.931	183.297	158.25	191.951	197.591	172.651	147.398	136.287	128.546	155.708	159.688	120.453	186.459
Lrrc20	219.83	1.24e-05	0.00144269	0.050776	0.525017	259.689	239.11	196.904	158.25	128.408	137.067	206.284	322.188	252.057	230.457	208.563	309.903	142.073	286.665
1810043G02Rik	110.443	1.03e-05	0.00144267	0.050787	0.525017	97.0554	114.856	100.053	104.907	82.0755	83.0711	91.9308	92.6128	142.149	106.543	190.707	155.628	92.6561	91.9612
Fance	315.141	7.62e-06	0.00144268	0.0508165	0.525017	236.737	231.801	295.356	288.051	284.617	304.99	189.467	181.965	540.751	392.587	602.833	361.328	315.031	186.459
Pqlc3	23.1221	-6.05e-06	0.00144268	0.0506994	0.525017	30.1659	30.2803	28.0148	21.3371	27.7998	20.7678	38.1177	31.9579	16.1199	12.7388	10.7139	13.5329	12.3541	29.8081
Zfp955a	410.979	-1.17e-05	0.00144266	0.0508174	0.525017	384.943	450.028	497.063	414.295	517.605	564.29	363.239	255.011	461.617	399.536	394.984	464.177	310.398	276.518
Actr2	3785.89	-1.32e-05	0.00144266	0.0506879	0.525017	3333.33	4031.46	3671.54	4944.87	4839.81	4842.45	3571.85	2949.91	2881.07	3097.85	2758.46	3685	5004.97	3389.88
Gltpd1	490.105	1.52e-05	0.0014427	0.0509034	0.52519	537.74	499.103	587.511	280.938	364.045	306.176	395.751	533.502	644.798	572.089	642.831	626.572	310.398	560.012
Pnkd	1749.3	9.18e-06	0.00144268	0.0509795	0.52519	1970.62	2065.33	1808.16	1130.87	1219.22	967.185	1275.82	2695.56	1661.82	1878.4	1965.64	2107.07	1097.97	2646.58
Slx4ip	49.0356	-9.75e-06	0.00144268	0.0509244	0.52519	59.0202	58.4723	60.8322	26.6714	58.2471	59.9299	67.2664	59.3505	41.0326	39.3745	32.1416	27.0657	57.1379	39.9555
Asic5	159.779	-1.08e-05	0.00144267	0.050947	0.52519	131.812	224.492	152.081	247.155	157.532	199.371	144.623	108.918	117.236	149.392	136.423	162.394	197.666	107.817
Gm16063	9.80893	6.07e-06	0.00144269	0.051021	0.525244	7.21358	9.39734	10.4055	5.33427	3.97139	6.52702	7.84775	18.2617	14.6545	3.47422	9.9996	21.6526	4.6328	13.9527
Intu	166.011	2.25e-05	0.00144273	0.0510725	0.5254	153.453	221.36	128.068	129.801	92.6659	134.694	172.651	178.051	200.767	180.66	181.421	208.406	154.427	187.728
2610528J11Rik	230.872	1.06e-05	0.00144267	0.0511234	0.52555	235.425	223.448	232.923	142.247	172.094	214.205	184.983	183.269	313.606	277.938	354.271	320.729	165.237	211.828
Alas1	10508.2	2.84e-06	0.00144267	0.0512012	0.525976	12124.1	10024.9	13962.6	8038.75	13825.7	9473.07	17351.4	10704.6	6398.15	4697.15	12925.9	7372.71	11577.4	8638.64
Zswim6	134.467	-7.62e-06	0.00144265	0.051273	0.52634	125.91	123.21	112.86	229.374	136.351	151.901	172.651	121.962	96.7197	133.179	102.139	104.203	142.073	130.014
Prkag2	825.128	-2.05e-05	0.00144271	0.0513255	0.526471	663.649	635.887	815.632	1061.52	1033.89	993.887	1200.71	795.036	636.005	628.834	616.404	783.553	921.928	764.863
Dnajb6	1046.64	-4.03e-05	0.00144294	0.0513586	0.526471	864.974	840.54	895.674	1591.39	1637.54	1378.98	1059.45	709.597	968.662	877.82	879.25	950.007	1270.93	728.079
Sh2d3c	166.119	1.69e-05	0.00144264	0.0514151	0.526677	173.126	137.828	130.469	176.031	160.18	170.296	122.201	187.182	168.527	167.921	157.137	186.754	194.578	193.436
Ankrd24	108.021	1.43e-05	0.00144266	0.0516135	0.528335	107.548	99.1942	112.059	80.0141	92.6659	102.652	88.5675	133.702	134.821	106.543	137.852	127.209	77.2134	112.256
Apol7a	3204.77	4.68e-05	0.00144303	0.0524374	0.528824	2162.76	3236.86	3108.85	1867	2295.47	3570.28	3435.07	3626.9	3040.81	3405.9	5246.22	4090.99	2893.96	2885.68
Ostc	757.594	3.69e-05	0.00144286	0.0519748	0.528824	788.903	858.29	719.581	769.913	520.253	566.664	574.007	691.987	914.441	997.102	901.392	870.163	701.098	732.518
Gramd4	126.796	2.01e-05	0.00144272	0.0524364	0.528824	124.598	136.784	124.066	113.798	100.609	85.4446	98.6574	170.877	155.338	178.343	123.566	128.562	77.2134	157.285
Klhl22	418.492	1.59e-05	0.00144264	0.0519888	0.528824	451.832	420.792	427.426	280.938	328.302	365.513	413.689	460.455	395.671	486.391	489.98	493.95	375.257	468.685
Htra2	208.372	1.32e-05	0.00144266	0.0521459	0.528824	171.159	216.139	195.303	186.7	168.122	144.781	227.585	190.443	279.901	211.928	314.987	216.526	197.666	195.972
Tmub1	298.574	1.14e-05	0.00144267	0.0523026	0.528824	279.362	278.788	282.55	241.82	238.284	262.267	244.401	212.618	435.239	382.164	467.124	370.801	270.247	214.365
Nfkbil1	274.268	1e-05	0.00144267	0.0521122	0.528824	222.309	239.11	232.123	314.722	254.169	218.358	207.405	226.314	306.279	368.268	461.41	299.076	298.044	192.167
Ccdc142	196.124	8.76e-06	0.00144268	0.0517937	0.528824	165.257	201.521	210.511	126.244	150.913	154.868	162.561	229.575	329.726	208.453	295.702	219.232	92.6561	198.509
Oxld1	468.253	8.66e-06	0.00144268	0.052493	0.528824	405.272	493.882	356.189	355.618	349.483	450.958	357.633	298.057	764.965	486.391	844.966	606.272	508.064	277.786
Zfp454	29.1028	7.39e-06	0.00144269	0.0522623	0.528824	32.789	33.4128	29.6157	8.89045	19.857	16.6142	23.5433	49.5674	26.3781	33.5842	39.2841	41.9519	13.8984	38.0529
Snapc2	216.844	7.23e-06	0.00144263	0.0519624	0.528824	230.179	184.814	185.698	199.146	201.217	161.395	210.768	215.227	235.937	224.666	303.559	300.43	165.237	217.536
Sult3a1	8.56836	3.46e-06	0.00144269	0.0522975	0.528824	5.90202	10.4415	13.6072	1.77809	1.3238	2.37346	1.12111	7.82644	30.7744	5.79037	18.5707	9.47301	4.6328	6.34215
Itgbl1	6.89732	3.3e-06	0.00144269	0.0519122	0.528824	9.8367	4.1766	4.00212	3.55618	1.3238	1.7801	4.48443	13.6963	4.39635	4.6323	0.714257	5.41315	16.9869	21.5633
Cd22	26.512	1.61e-06	0.00144268	0.0520912	0.528824	28.8543	32.3686	23.2123	12.4466	9.26659	14.8341	20.1799	36.5234	67.4107	35.9003	30.713	21.6526	9.26561	28.5397
L3mbtl2	488.825	-1.87e-06	0.00144259	0.0518816	0.528824	489.868	501.192	513.872	414.295	432.882	332.878	469.744	565.46	574.456	567.456	537.121	503.423	413.864	527.033
Lipo1	80.3738	-5.3e-06	0.00144265	0.0524238	0.528824	81.3167	81.4436	118.463	80.0141	78.1041	100.279	84.0831	71.7423	77.6688	48.6391	64.2831	58.1913	97.2889	83.7164
Zmym2	897.744	-9.48e-06	0.00144266	0.0523808	0.528824	647.255	750.743	846.048	1105.97	1208.63	1459.08	987.696	678.943	847.03	924.143	738.542	799.793	886.41	688.123
Mphosph8	490.42	-1.18e-05	0.00144266	0.0523422	0.528824	377.073	553.399	497.864	649.003	553.348	675.25	487.682	590.244	452.824	377.532	361.414	385.687	515.785	388.774
Wdfy1	405.024	-1.76e-05	0.00144264	0.0525022	0.528824	407.239	458.381	409.017	497.865	419.644	462.825	405.841	465.673	341.45	303.415	316.416	359.974	390.7	431.9
Atxn3	801.39	-2.07e-05	0.00144263	0.0518535	0.528824	753.491	813.392	918.887	766.357	876.354	1012.87	848.678	676.987	797.205	770.119	594.976	759.194	804.563	826.382
Api5	1876.52	-2.68e-05	0.00144264	0.052259	0.528824	1752.9	1922.28	1870.59	2206.61	2175	1908.26	2102.08	1818.34	1579.76	1573.82	1564.22	1893.25	1973.57	1930.55
Ap1g1	2292.87	-4.82e-05	0.00144297	0.0524208	0.528824	2154.24	2252.23	2450.9	2476.88	2728.35	2602.5	2571.82	2377.93	1776.13	2182.97	1639.22	2048.88	2334.93	2503.25
Mon2	1921.39	-5.86e-05	0.00144309	0.0521585	0.528824	1824.38	1864.85	1946.63	2037.69	2283.55	2038.21	2239.97	1963.13	1597.34	1880.71	1607.79	1720.03	1894.82	2000.31
Dtx1	10.5176	4.6e-06	0.00144268	0.0525658	0.529096	12.4598	7.30904	8.00424	3.55618	5.29519	11.8673	7.84775	14.3485	11.7236	15.055	15.7137	6.76643	10.8099	16.4896
Eme2	226.109	2.18e-05	0.00144275	0.0527125	0.529468	192.144	195.256	236.125	149.36	191.951	206.491	169.287	174.79	432.308	331.209	299.988	273.364	155.971	157.285
Gm8801	25.0228	-7.07e-06	0.00144268	0.0526736	0.529468	21.6407	18.7947	27.2144	51.5646	17.2094	36.1953	35.8754	16.9573	20.5163	34.7422	19.9992	18.946	15.4427	15.2212
Tmem87b	1644.37	-8.12e-06	0.00144269	0.0526775	0.529468	1352.22	1092.18	1293.48	2937.41	2847.49	2268.44	1781.44	1174.62	1217.79	1136.07	889.964	1153	2628.34	1248.77
Cxxc5	1420.53	1.59e-05	0.00144265	0.0531411	0.530031	1296.48	1276.99	1299.89	1171.76	1474.71	1122.05	1455.2	1572.46	1513.81	1810.07	1712.07	1621.24	982.154	1578.56
Slc48a1	1559.99	1.31e-05	0.00144266	0.0532756	0.530031	1813.89	1480.6	1365.52	1386.91	1334.39	1121.46	1294.88	1346.15	2208.43	1591.19	2303.48	1771.45	1334.25	1487.23
2310011J03Rik	611.71	1.25e-05	0.00144269	0.05331	0.530031	582.988	558.62	593.114	510.312	509.662	473.505	445.08	450.672	1166.5	663.577	908.535	788.966	471.002	441.414
Apbb1	11.1617	5.97e-06	0.00144269	0.0528628	0.530031	15.0829	14.6181	8.80466	7.11236	5.29519	5.93365	3.36332	14.3485	11.7236	16.213	13.5709	13.5329	10.8099	15.8554
Zfp956	190.692	5.09e-06	0.00144267	0.0531242	0.530031	190.832	215.095	175.293	142.247	123.113	136.474	155.834	195.009	379.552	188.766	226.419	249.005	118.909	173.141
Mkl2	1155.54	2.15e-06	0.00144267	0.0529319	0.530031	893.828	977.323	903.679	2082.14	1873.17	1340.41	1412.6	1187.66	593.507	638.099	648.545	886.403	1528.83	1211.35
Ulk1	2863.41	-6.68e-06	0.00144269	0.0533182	0.530031	2147.02	1956.74	1929.82	5606.32	4548.57	3557.82	4231.06	2501.2	1357.01	1593.51	1671.36	2042.11	4476.83	2468.36
Snord4a	29.035	-9.1e-06	0.00144268	0.0531667	0.530031	29.5101	30.2803	22.4119	46.2304	38.3901	30.2616	35.8754	26.0881	20.5163	23.1615	19.9992	29.7723	32.4296	21.5633
Atxn1	887.28	-9.7e-06	0.00144268	0.0531926	0.530031	1451.24	1161.09	782.815	1034.85	1175.53	780.275	673.786	661.986	805.997	1121.02	472.838	866.104	790.665	643.728
Smarca2	2173.33	-1.03e-05	0.00144267	0.0529525	0.530031	2050.62	2332.63	2057.09	2371.97	2922.95	2568.68	2855.46	2711.86	1052.19	1689.63	1352.09	1829.64	2344.2	2287.61
Phc3	1134.08	-1.1e-05	0.00144266	0.0532792	0.530031	1052.53	1163.18	1291.88	901.492	1376.75	1507.74	1516.86	1337.67	863.15	902.14	753.541	875.577	1019.22	1315.36
Rps3a1	519.691	-1.28e-05	0.00144265	0.0532144	0.530031	579.709	661.99	503.467	652.559	620.861	412.389	565.038	470.891	527.562	526.924	324.987	382.98	503.431	542.888
Polr1a	413.929	-1.41e-05	0.00144266	0.0529676	0.530031	409.862	389.468	483.456	440.967	451.415	436.123	566.159	487.196	310.675	345.106	279.274	372.154	358.27	464.88
Galnt7	107.407	-3.48e-05	0.00144284	0.0528812	0.530031	118.04	113.812	101.654	151.138	100.609	135.287	105.384	95.8738	101.116	89.1717	64.9974	112.323	109.643	104.645
C1s	15749.3	-0.00078286	0.00157888	0.0531045	0.530031	15033.1	17100	15653.1	17738.2	17621.1	18243	15620.4	14908.1	11883.3	15051.5	14040.1	14964.6	17780.7	14853.3
Tlr12	717.33	4.28e-06	0.00144269	0.0534581	0.530692	1028.92	860.379	676.358	129.801	407.73	281.255	428.263	1291.36	870.477	628.834	699.258	778.14	466.369	1495.48
Bckdhb	903.974	-1.76e-05	0.00144263	0.0534545	0.530692	887.926	1017	906.88	979.728	1053.74	873.434	1089.72	954.825	732.725	635.783	757.827	897.229	992.964	875.851
Pard6b	204.536	7.91e-06	0.00144268	0.0535528	0.530903	261.656	187.947	224.119	104.907	144.294	138.847	159.197	275.23	228.61	280.254	202.135	228.705	125.086	302.521
Purb	2069.82	-8.7e-06	0.00144265	0.0535201	0.530903	2053.9	1933.76	2333.24	2350.64	2388.13	2552.06	2370.02	2203.14	1453.73	1653.73	1215.67	1734.91	2415.23	2319.32
Dlg3	481.804	1.89e-05	0.00144262	0.0536177	0.531182	429.536	468.823	503.467	376.955	422.292	475.285	452.927	490.457	536.355	563.982	582.834	580.56	407.687	454.098
Cwc25	300.3	-2.4e-05	0.00144257	0.0536717	0.531353	308.217	310.112	328.174	284.495	319.035	305.583	362.118	299.361	285.763	296.467	285.703	297.723	256.348	265.102
Tbpl1	178.736	-1.79e-05	0.00144263	0.0537257	0.531524	178.372	175.417	192.902	184.921	193.275	233.193	186.104	173.486	178.785	156.34	195.706	159.688	148.25	145.869
Aldh1l2	8.12538	5.51e-06	0.00144269	0.0538708	0.532038	8.52514	3.13245	4.80254	3.55618	6.61899	7.71375	7.84775	5.21762	11.7236	10.4227	12.8566	8.11972	9.26561	13.9527
Slc22a13b-ps	6.47328	-4.91e-06	0.00144269	0.053888	0.532038	7.21358	7.30904	11.2059	10.6685	10.5904	7.71375	4.48443	5.21762	4.39635	0	5.71406	5.41315	3.08854	7.61058
Rbm14	487.342	-1.76e-05	0.00144263	0.053841	0.532038	529.214	462.558	558.696	378.733	627.48	583.278	520.194	472.195	464.548	426.171	404.269	499.363	429.306	466.782
Rae1	174.131	1.63e-05	0.00144264	0.0539548	0.532335	193.455	164.976	143.276	165.362	148.265	144.188	164.803	226.967	148.01	185.292	187.85	201.64	165.237	198.509
Tmub2	715.812	2.1e-05	0.00144261	0.0543666	0.532382	740.376	673.476	610.723	723.683	661.899	570.224	718.63	712.858	738.587	758.539	827.109	882.343	639.327	763.595
Dffb	79.396	1.3e-05	0.00144266	0.0543795	0.532382	60.3318	79.3553	64.8343	76.4579	68.8375	76.5441	73.9931	84.1342	112.84	90.3298	102.853	82.5505	50.9608	87.5217
Gm10319	1237.42	7.99e-06	0.00144268	0.0544014	0.532382	876.778	1014.91	930.893	1166.43	1052.42	1317.27	878.948	677.639	1915.34	2258.24	1845.64	1479.14	1199.9	710.321
Zfp964	26.1156	7.54e-06	0.00144268	0.0543624	0.532382	23.6081	24.0154	25.6136	19.559	17.2094	18.3943	22.4221	18.2617	29.309	47.481	44.9982	29.7723	13.8984	31.0765
A530064D06Rik	4.86516	-3.97e-06	0.00144269	0.054121	0.532382	7.21358	8.35319	4.80254	5.33427	7.94279	3.56019	6.72664	2.60881	2.9309	0	2.14277	4.05986	9.26561	3.17107
Deptor	3183.8	-6.95e-06	0.00144267	0.0543583	0.532382	3495.31	3154.37	3860.44	3072.54	3715.9	3560.19	4494.52	3468.42	1527	2545.45	1559.22	2752.59	3385.03	3982.24
Neb	482.04	-9.99e-06	0.00144268	0.0543351	0.532382	309.528	571.15	537.084	391.18	503.043	819.437	725.356	495.674	331.192	447.017	337.844	483.123	520.418	276.518
Smcr8	1649.47	-1.3e-05	0.00144266	0.0541621	0.532382	1531.9	1422.13	1678.49	2284.85	2002.91	1870.29	1937.27	1712.03	1053.66	1458.02	1151.38	1406.07	1936.51	1647.06
Sde2	356.034	-1.42e-05	0.00144261	0.0540096	0.532382	319.365	326.819	351.386	410.739	454.063	402.895	410.325	293.491	369.293	291.835	339.272	339.675	372.169	303.155
Klhl24	3082.46	-1.44e-05	0.00144266	0.0541016	0.532382	2756.24	3283.85	2987.18	3293.02	3649.71	4047.94	3670.51	2381.19	2302.22	2477.12	2654.89	2460.28	4229.75	2960.52
Slmap	1865.07	-2.15e-05	0.00144263	0.054399	0.532382	1698.47	1796.98	1962.64	2035.91	2315.32	2223.93	1909.25	1835.3	1566.57	1720.9	1459.23	1682.14	2073.95	1830.34
Dpm1	471.638	-2.3e-05	0.00144258	0.0542348	0.532382	441.996	437.498	466.647	561.877	561.29	527.502	495.529	424.584	449.893	440.068	433.554	475.004	466.369	421.119
Cnnm1	14.3764	5.93e-06	0.00144269	0.0544489	0.532487	19.0176	8.35319	9.60509	7.11236	9.26659	8.90048	15.6955	27.3925	10.2581	10.4227	11.4281	23.0059	15.4427	25.3686
Gprin3	664.2	-7.24e-06	0.00144268	0.0545497	0.533112	704.308	547.134	942.899	277.382	638.071	847.325	1530.31	618.288	458.686	552.401	489.98	457.411	471.002	763.595
Gm6194	490.296	1.61e-05	0.00144265	0.0546362	0.533597	533.149	343.525	465.847	421.408	472.596	412.982	487.682	532.198	567.129	423.855	539.264	515.602	687.199	461.708
Zfp414	79.2411	1.32e-05	0.00144267	0.05488	0.534055	79.3494	79.3553	77.6411	55.1208	66.1899	59.3365	77.3564	107.614	104.047	88.0136	84.9966	83.9038	49.4166	97.0349
Mtif3	900.002	1.06e-05	0.00144267	0.0548015	0.534055	836.119	955.396	850.851	615.219	824.726	706.698	719.751	734.381	1544.58	1001.73	1305.66	1075.86	753.603	675.439
4930480G23Rik	213.433	8.56e-06	0.00144269	0.0547574	0.534055	205.915	201.521	232.923	113.798	225.046	131.134	125.564	155.877	354.639	204.979	397.841	308.549	183.768	146.504
Ppil4	457.172	-1.95e-07	0.00144264	0.0549046	0.534055	376.418	410.351	439.433	561.877	616.89	632.527	513.467	372.408	363.432	342.79	367.128	385.687	625.428	392.579
Zc3h12c	371.807	-1.22e-05	0.00144267	0.0548402	0.534055	363.302	350.834	397.01	336.059	465.977	449.177	522.436	395.887	262.316	284.886	244.276	290.957	429.306	412.874
Brpf3	1061.9	-1.26e-05	0.00144266	0.0547946	0.534055	1005.97	965.838	1018.94	1338.9	1240.4	1163.59	1472.01	1332.45	748.845	913.721	716.4	876.93	951.269	1121.29
2810459M11Rik	2762.84	9.25e-06	0.00144268	0.0549785	0.534415	2831.66	2758.64	3054.42	1602.06	2307.38	2093.99	1945.12	2690.34	3870.25	3881.86	3813.42	3620.04	1413	2797.52
Msl1	1442.91	2.06e-05	0.00144261	0.0551945	0.534556	1411.89	1434.66	1439.16	1194.88	1413.82	1277.52	1284.79	1807.91	1488.9	1642.15	1456.37	1522.45	1190.63	1635.64
Dapk3	508.221	1.61e-05	0.00144262	0.0550895	0.534556	501.672	458.381	456.242	513.868	452.739	443.837	466.381	473.499	594.973	601.041	624.261	640.105	420.041	468.051
Plac9b	26.538	-9.2e-06	0.00144268	0.0552148	0.534556	36.0679	29.2362	24.8131	33.7837	21.1808	30.855	35.8754	15.0007	20.5163	27.7938	28.5703	20.2993	24.7083	22.8317
Ankrd12	583.911	-1.04e-05	0.00144267	0.0551593	0.534556	545.609	660.946	557.895	691.677	664.547	793.329	672.664	759.817	322.399	342.79	458.553	510.189	565.202	629.141
Srsf1	3759.3	-1.66e-05	0.00144264	0.055073	0.534556	3183.16	3757.89	3936.48	4087.83	4503.56	5048.35	3885.76	3182.75	3782.33	3495.07	2729.89	3774.32	4067.6	3195.17
Rrm2	259.306	-2.06e-05	0.00144276	0.0551413	0.534556	113.45	161.843	172.892	649.003	452.739	412.389	477.592	135.006	73.2725	84.5394	67.1401	143.448	565.202	121.769
Aqp9	13382.4	0.000212136	0.00145047	0.0553747	0.534896	11908.3	14352.9	12402.6	11454.5	12357.7	11520.2	13765	14718.3	12805.1	12567.4	13998	17610.3	13061.4	14831.8
Znhit2	730.412	1.11e-05	0.00144267	0.0554348	0.534896	793.494	696.447	689.165	727.239	497.748	519.788	571.765	633.289	1107.88	866.24	959.961	1006.85	520.418	635.483
Peli3	24.2482	6.09e-06	0.00144269	0.0553706	0.534896	32.1332	20.883	23.2123	5.33427	11.9142	19.5811	17.9377	41.741	26.3781	40.5326	22.142	39.2453	9.26561	29.1739
Sla	68.5658	-9.35e-06	0.00144267	0.0554205	0.534896	83.2841	81.4436	62.4331	80.0141	91.3421	77.7308	62.782	45.6542	79.1343	40.5326	60.7118	41.9519	92.6561	60.2504
Cped1	1407.59	-1.73e-05	0.00144261	0.0553556	0.534896	1417.8	1481.65	1378.33	1477.59	1608.41	1729.66	1451.83	1228.75	1140.12	1486.97	1049.24	1285.62	1613.76	1356.59
Hsd3b6	19.5194	-4.78e-06	0.00144269	0.0555086	0.534903	10.4925	26.1037	20.811	16.0028	31.7712	40.3488	24.6644	7.17423	11.7236	25.4776	10.7139	21.6526	23.164	3.17107
Atf1	696.798	-2.72e-05	0.00144268	0.0555095	0.534903	705.619	711.065	713.978	753.91	864.44	741.706	715.267	705.031	571.525	582.511	532.121	676.643	765.957	715.394
Tube1	17.3704	4.33e-06	0.00144268	0.055637	0.535004	9.18092	17.7505	17.6093	5.33427	10.5904	17.2076	17.9377	31.9579	20.5163	28.9519	18.5707	24.3592	9.26561	13.9527
Lrrtm2	12.6697	-6.19e-06	0.00144269	0.055612	0.535004	10.4925	10.4415	24.8131	10.6685	15.8856	13.6474	22.4221	16.3051	7.32725	9.26459	7.85683	9.47301	9.26561	9.51322
Psd	53.8167	-1.04e-05	0.00144267	0.055668	0.535004	64.9222	60.5606	44.8237	88.9045	54.2757	58.7432	56.0554	65.2203	32.2399	42.8487	35.7128	52.7782	49.4166	46.9319
Rbbp7	537.28	-1.94e-05	0.00144267	0.0556354	0.535004	545.609	548.178	533.883	698.79	660.575	490.713	599.792	495.674	442.566	458.597	389.984	464.177	648.592	544.791
Rdm1	101.834	1.77e-05	0.0014427	0.0558543	0.535198	68.8569	109.636	81.6432	85.3484	99.2849	94.3451	93.0519	118.049	87.927	114.649	160.708	121.796	114.276	76.1058
Bap1	892.853	1.73e-05	0.00144263	0.0561691	0.535198	795.461	880.218	835.643	963.725	788.984	724.499	798.228	826.341	1109.35	932.25	1207.81	973.013	857.069	807.356
Ing4	394.104	1.55e-05	0.00144265	0.0561231	0.535198	379.697	420.792	353.787	382.29	328.302	344.152	316.152	425.889	438.17	406.484	567.834	461.471	301.132	391.311
BC024386	6898.94	1.03e-05	0.00144267	0.0561522	0.535198	4908.51	7341.41	5857.5	4566.14	4796.12	8044.25	6688.53	8134.28	7961.79	6387.94	11885.2	8571.72	5069.83	6371.96
4932416H05Rik	48.9618	9.42e-06	0.00144268	0.0561656	0.535198	44.593	59.5165	50.4267	40.8961	30.4474	34.4152	33.6332	45.002	83.5306	56.7456	53.5693	56.838	32.4296	63.4215
Car7	27.3904	7.06e-06	0.00144268	0.0561019	0.535198	17.7061	36.5452	23.2123	24.8933	14.5618	15.4275	28.0277	28.6969	29.309	37.0584	27.856	47.365	29.3411	23.466
Mapk15	187.036	6.64e-06	0.00144269	0.0559256	0.535198	197.39	175.417	156.883	101.351	108.551	101.465	219.737	412.845	137.752	123.914	244.99	169.161	140.528	328.523
Sacm1l	1791.43	5.63e-06	0.00144265	0.0558203	0.535198	1382.38	1791.76	1816.96	2334.63	2310.03	2542.57	1771.35	1406.15	1398.04	1383.9	1297.8	1724.09	2422.96	1497.38
Tbl1xr1	1768.2	-1.53e-05	0.00144268	0.0559026	0.535198	1819.13	1664.37	1662.48	1907.89	2879.26	1911.82	1854.31	1724.42	1362.87	1256.51	1131.38	1759.27	1938.06	1882.98
Zfp1	248.051	-1.54e-05	0.00144267	0.0560361	0.535198	226.9	220.315	225.72	360.952	297.855	313.297	272.429	241.967	206.628	158.656	283.56	234.119	225.463	204.851
Atp7a	312.832	-1.56e-05	0.00144265	0.0561482	0.535198	278.051	316.377	338.579	391.18	345.511	389.841	315.031	273.273	271.108	240.879	256.418	259.831	395.333	308.228
Alcam	1393.01	-1.65e-05	0.00144265	0.0560034	0.535198	1335.17	1611.12	1271.07	1726.53	1419.11	1873.85	1328.51	1274.4	1033.14	1248.4	1111.38	1234.2	1593.68	1441.57
Idh3a	627.406	-1.92e-05	0.00144262	0.0561118	0.535198	609.22	752.831	770.008	677.453	620.861	681.183	580.734	624.158	646.263	609.147	527.122	614.392	460.192	610.115
Mtpn	4972.29	-2.28e-05	0.00144266	0.0562185	0.535315	4650.14	4830.23	5310.81	5288.04	6241.71	6081.99	4917.18	3797.78	5063.13	4377.52	4254.11	4932.73	5642.75	4223.87
Pde4b	288.562	1.26e-05	0.0014427	0.056375	0.5361	314.119	219.271	343.382	195.59	117.818	159.022	330.727	306.535	372.224	545.453	295.702	196.227	341.283	302.521
Manf	1249.34	7.19e-06	0.00144268	0.0563502	0.5361	1253.85	1335.47	1373.53	1372.69	569.233	698.984	576.249	1149.18	1708.71	2455.12	1602.79	1546.81	841.626	1006.5
Acp2	1521.01	1.63e-05	0.00144262	0.0567252	0.536257	1493.21	1518.19	1545.62	1168.21	1176.86	1614.55	1356.54	1625.29	1607.6	1783.43	1779.93	1714.61	1247.77	1662.28
H1f0	5869.73	1.58e-05	0.00144265	0.0564701	0.536257	5189.84	5445.24	5562.15	6145.08	5435.52	4940.95	4913.81	5469.37	7519.22	8108.84	6530.45	6996.49	4918.49	5000.78
Ppcdc	312.14	1.49e-05	0.00144267	0.0567037	0.536257	304.282	360.231	254.535	268.492	210.484	258.707	301.578	330.667	394.206	267.515	462.124	392.453	264.07	300.618
Gipc1	285.136	1.07e-05	0.00144268	0.05666	0.536257	323.955	274.611	228.121	243.598	137.675	247.433	278.035	227.619	389.81	352.055	458.553	327.495	248.627	254.32
Slc4a4	4668.47	1.03e-05	0.00144267	0.0567064	0.536257	4224.53	5153.92	5234.77	2923.18	4057.44	3069.48	3907.06	6844.87	4199.98	4469.01	4711.95	5774.47	3432.91	7354.99
1110008J03Rik	139.587	6.82e-06	0.00144268	0.0566077	0.536257	154.764	124.254	128.068	74.6798	115.17	100.872	102.021	103.048	269.643	184.134	246.419	177.281	67.9478	105.914
Taco1	464.77	2.06e-07	0.00144264	0.0566114	0.536257	445.93	460.47	565.099	259.601	346.835	354.832	460.775	585.678	495.322	566.298	507.837	488.537	361.359	608.212
Rsc1a1	15.4924	-6.07e-06	0.00144269	0.0566461	0.536257	13.1156	17.7505	11.2059	12.4466	29.1236	20.1744	29.1488	16.9573	11.7236	4.6323	7.85683	10.8263	15.4427	16.4896
Fam120c	366.317	-1.29e-05	0.00144266	0.0566371	0.536257	309.528	352.922	378.6	433.854	381.254	513.854	452.927	374.365	240.334	309.206	251.418	353.208	401.51	375.455
Smyd5	214.744	1.35e-05	0.00144266	0.0569202	0.536318	203.948	191.079	201.707	220.483	201.217	159.615	181.619	243.272	284.297	235.089	207.135	312.609	154.427	209.925
Katnb1	37.2094	1.31e-05	0.0014427	0.0568401	0.536318	38.0352	39.6777	49.6263	19.559	18.5332	27.2948	24.6644	48.9152	48.3598	40.5326	49.2837	52.7782	26.2526	37.4187
Prkd3	3335.97	-4.23e-06	0.00144266	0.0569912	0.536318	2924.78	3629.46	3298.55	1811.87	2296.79	3609.44	2771.38	3767.12	3789.65	4391.42	4497.68	4101.81	1905.63	3908.03
Sh3bgrl	6304.89	-9.74e-06	0.00144268	0.0568292	0.536318	5583.97	7415.55	6705.95	7197.71	8530.56	8723.06	5828.64	4103.01	6127.05	4044	4189.12	5644.56	9753.59	4421.75
Rpl10a	519.08	-1.5e-05	0.00144265	0.0568957	0.536318	585.611	444.807	511.471	721.905	598.357	553.016	530.284	389.365	561.267	519.975	507.122	473.65	504.976	365.308
Skiv2l2	311.598	-1.68e-05	0.00144263	0.0569807	0.536318	324.611	294.45	304.961	353.84	350.807	355.426	362.118	309.144	231.541	350.896	234.991	272.011	325.84	291.739
Epb4.1	3873.81	-4.62e-05	0.00144291	0.0569648	0.536318	3795.65	3698.38	4062.95	4381.22	4970.86	3798.72	4195.18	4240.62	3461.39	3923.56	2948.45	3675.53	3400.48	3680.35
Sec22b	1034.72	8.24e-05	0.00144366	0.0571641	0.537023	1080.73	1008.65	1001.33	1049.07	935.925	862.16	905.855	1044.83	1113.74	1170.81	932.105	1194.95	1053.19	1132.71
Cdk5rap2	64.8597	1.8e-05	0.00144273	0.0571932	0.537023	73.4474	71.0021	60.0318	19.559	37.0664	40.3488	71.7509	114.136	48.3598	72.9587	64.9974	63.6045	64.8592	105.914
Mib2	551.429	1.67e-05	0.00144263	0.0573631	0.537023	549.544	621.269	484.256	481.863	463.329	468.758	504.498	730.467	499.718	588.302	682.115	583.267	498.798	563.817
Bcl2l12	95.5595	1.21e-05	0.00144267	0.0573288	0.537023	110.827	89.7968	84.0445	65.7894	76.7803	89.0048	76.2353	101.744	114.305	106.543	132.852	132.622	71.0363	86.2532
Fbxo10	26.6906	8.1e-06	0.00144268	0.0572855	0.537023	30.1659	21.9271	24.0127	26.6714	13.238	15.4275	26.9066	37.1756	29.309	38.2164	31.4273	14.8862	26.2526	38.0529
Zmynd19	161.397	7.12e-06	0.00144265	0.0572832	0.537023	165.912	134.695	136.072	161.806	162.827	137.067	110.99	127.18	224.214	180.66	240.705	171.867	159.06	146.504
Snai2	222.621	6.82e-06	0.00144269	0.0572161	0.537023	201.324	299.671	128.068	133.357	124.437	218.358	158.076	219.14	174.389	163.288	229.276	231.412	592.999	242.904
Col4a4	14.5623	4.52e-06	0.00144269	0.0572933	0.537023	10.4925	13.5739	5.60297	8.89045	6.61899	4.15356	24.6644	18.9139	14.6545	33.5842	6.42831	8.11972	24.7083	23.466
Tigit	4.78481	3.04e-06	0.00144269	0.0574573	0.537556	3.2789	5.22075	1.60085	7.11236	1.3238	0.593365	2.24221	10.4352	1.46545	3.47422	9.9996	0	13.8984	6.34215
U2af1	193.558	-2.23e-05	0.00144273	0.0575236	0.537829	158.043	168.108	204.108	247.155	189.303	215.392	321.758	180.008	183.181	174.869	147.851	136.682	214.653	168.701
Sowahc	522.414	0.000230036	0.00145202	0.0583401	0.539373	545.609	528.339	505.067	830.368	687.051	555.39	424.9	410.888	501.184	383.323	352.129	418.166	688.743	482.638
Ttc23	1326.19	9.76e-05	0.00144432	0.0585901	0.539373	1164.01	1045.19	1411.15	1328.23	1840.08	1875.03	1967.54	1344.84	794.274	631.15	873.536	1247.73	1720.31	1323.61
Dmwd	506.962	2.89e-05	0.00144262	0.0579563	0.539373	485.933	460.47	465.046	574.323	454.063	467.572	457.412	510.023	492.391	611.463	558.549	504.776	529.684	525.764
Rabggta	336.864	2.66e-05	0.0014427	0.0584805	0.539373	344.284	329.951	289.753	320.056	292.559	306.77	307.183	384.148	339.984	349.738	426.411	415.459	260.981	348.818
Hmgcl	3878.59	1.89e-05	0.00144263	0.0585496	0.539373	3991.73	3837.25	3336.97	3504.62	3954.19	3113.39	3502.34	3549.29	4887.28	3452.22	4861.23	4433.37	4137.09	3739.33
Zfp444	818.54	1.67e-05	0.00144269	0.0586211	0.539373	748.901	752.831	659.549	761.023	706.908	820.624	646.879	661.334	1129.86	1037.63	1240.66	970.307	756.691	566.354
4933439C10Rik	66.8353	1.63e-05	0.00144271	0.0583114	0.539373	70.8242	75.1787	60.0318	48.0085	38.3901	65.8635	45.9654	95.8738	83.5306	48.6391	91.4249	83.9038	49.4166	78.6427
Kazald1	30.5922	1.38e-05	0.0014427	0.0578142	0.539373	30.1659	35.5011	25.6136	17.7809	11.9142	35.0085	22.4221	37.1756	42.498	31.268	49.2837	25.7124	27.7968	36.1503
Cyb5r1	96.127	1.3e-05	0.00144266	0.0581866	0.539373	87.8745	103.371	78.4415	99.5731	68.8375	72.9839	98.6574	97.1783	130.425	120.44	110.71	82.5505	81.8462	112.89
Txnl4b	337.57	1.15e-05	0.00144267	0.0585546	0.539373	335.104	343.525	324.972	273.826	242.255	320.417	242.159	230.228	482.133	420.381	493.552	381.627	367.536	268.273
Ehhadh	10094.8	9.07e-06	0.00144268	0.0580186	0.539373	9013.04	7388.4	8566.14	10741.4	9992.03	6546.6	8441.94	9213.02	21188.9	14561.6	9344.62	9439.18	7375.42	9514.49
Ptpdc1	49.236	8.89e-06	0.00144268	0.0582429	0.539373	46.5604	52.2075	50.4267	35.5618	23.8284	29.6683	57.1765	70.4379	67.4107	61.3779	50.7122	48.7183	32.4296	62.7873
Wfs1	244.356	7.57e-06	0.00144268	0.0584774	0.539373	252.475	305.936	226.52	183.143	116.494	125.793	214.132	371.756	189.043	412.274	192.135	316.669	168.325	346.281
4930525G20Rik	14.7703	6.44e-06	0.00144269	0.0585253	0.539373	15.0829	14.6181	16.0085	3.55618	10.5904	14.2408	5.60554	21.5227	24.9126	25.4776	15.7137	14.8862	6.17707	18.3922
Mycn	54.2485	3.88e-06	0.00144269	0.0582918	0.539373	42.6257	96.0617	14.4076	39.118	39.7139	39.1621	17.9377	57.3939	102.581	41.6907	60.7118	119.089	40.151	48.8345
Mt1	6987.68	-3.76e-06	0.00144269	0.0580538	0.539373	5256.73	3448.82	3577.89	23970.4	19024.3	5562.21	3726.56	2672.73	4918.05	4392.58	4707.67	4681.02	9214.65	2673.85
Slfn4	27.8613	-3.97e-06	0.00144269	0.0584651	0.539373	48.5277	25.0596	8.00424	65.7894	37.0664	33.2284	35.8754	13.0441	11.7236	9.26459	9.28534	6.76643	64.8592	21.5633
C4bp-ps1	17.5743	-4.03e-06	0.00144269	0.0579865	0.539373	11.804	21.9271	12.0064	30.2275	25.1522	36.1953	13.4533	14.3485	17.5854	4.6323	12.8566	13.5329	24.7083	7.61058
Itih5	391.343	-5.86e-06	0.00144268	0.0581924	0.539373	278.706	443.763	324.172	633	427.587	701.951	390.145	285.013	168.527	438.91	202.849	307.196	467.913	409.069
Dnase1l2	17.8998	-7.48e-06	0.00144268	0.0586197	0.539373	15.0829	22.9713	19.2102	28.4495	19.857	26.1081	14.5744	13.0441	16.1199	16.213	14.2851	24.3592	10.8099	9.51322
Syt15	28.955	-8.47e-06	0.00144268	0.0581125	0.539373	27.5428	28.192	31.2165	49.7865	27.7998	40.3488	30.2699	32.6102	21.9817	12.7388	18.5707	27.0657	29.3411	27.9055
Usp40	826.304	-1.06e-05	0.0014426	0.0578803	0.539373	762.672	842.628	939.698	757.467	965.049	1023.55	931.64	921.563	618.42	706.425	737.113	837.685	676.389	847.945
Polr2b	570.292	-1.1e-05	0.00144267	0.0584988	0.539373	570.529	587.856	625.931	572.545	732.06	609.386	765.716	663.29	301.883	530.398	334.272	498.01	514.241	677.976
Sos1	1620.24	-1.12e-05	0.00144267	0.0581855	0.539373	1363.37	1546.38	1774.54	1566.5	2020.12	2167.56	2164.86	1799.43	1068.31	1371.16	945.676	1564.4	1502.57	1828.44
Zcchc2	992.711	-2.76e-05	0.00144278	0.0577949	0.539373	1025.64	785.2	1219.85	849.927	1141.11	1069.84	1661.48	1106.14	740.052	961.202	737.113	853.924	670.212	1076.26
Wdr26	4786.45	0.000260433	0.0014547	0.0594676	0.539907	4443.56	5009.83	4590.43	5444.51	6089.47	5493.97	5390.28	4997.18	3095.03	4206.13	3477	4293.98	5428.1	5050.89
Stambp	241.589	2.3e-05	0.00144259	0.0594973	0.539907	213.128	237.022	228.921	229.374	244.903	218.952	227.585	266.099	238.868	242.038	228.562	267.951	257.893	280.957
Sec14l2	13389.9	2.11e-05	0.0014426	0.0594696	0.539907	11907.7	12876.4	12094.4	11849.2	13604.7	12479.7	13248.1	15629.4	12743.6	13639.8	17020.7	15623.7	12079.3	12662.1
Tmem115	908.745	1.65e-05	0.00144263	0.0594139	0.539907	938.421	838.452	870.061	924.607	875.031	679.403	763.474	787.209	1006.76	1140.7	1102.81	1054.21	900.308	840.969
Tmem63a	215.619	1.6e-05	0.00144264	0.0594192	0.539907	178.372	156.622	223.318	177.809	203.865	208.865	236.554	201.531	205.163	258.251	253.561	247.651	260.981	206.12
Mfsd3	232.967	1.5e-05	0.00144266	0.0592438	0.539907	201.324	200.477	192.102	229.374	211.808	217.765	224.221	179.356	306.279	265.199	314.987	282.837	245.539	190.264
BC052040	97.9748	1.2e-05	0.00144269	0.0593564	0.539907	95.0881	123.21	94.45	51.5646	54.2757	71.2038	99.7786	110.222	68.8761	90.3298	124.281	140.742	108.099	139.527
Nt5e	357.268	1.2e-05	0.00144268	0.0591552	0.539907	440.028	261.037	376.199	311.166	321.683	234.973	229.827	496.327	366.362	318.47	344.272	284.19	393.788	623.433
Gyltl1b	13.0027	4.47e-06	0.00144269	0.0592014	0.539907	10.4925	18.7947	9.60509	8.89045	7.94279	8.30711	6.72664	26.7403	10.2581	10.4227	12.8566	27.0657	6.17707	17.758
Snord8	4.27358	3.64e-06	0.00144269	0.0595321	0.539907	2.62312	2.0883	3.2017	3.55618	3.97139	1.18673	4.48443	7.82644	10.2581	1.15807	6.42831	2.70657	4.6328	5.70793
Gnpda1	511.216	2.68e-06	0.00144263	0.0593945	0.539907	548.888	527.295	576.305	396.514	342.864	341.778	487.682	632.637	679.969	485.233	574.263	514.249	449.382	599.967
Upp2	17284.2	-2.84e-06	0.00144269	0.0592017	0.539907	9817.03	9693.88	12356.9	41461.5	32433.1	40319.2	23434.5	1801.38	7652.58	5404.73	11431	7309.1	37060.9	1803.07
Arhgef37	272.39	-5.05e-06	0.00144269	0.0590849	0.539907	144.927	188.991	202.507	590.326	386.549	409.422	445.08	160.442	131.89	97.2782	193.564	161.041	557.481	143.967
Hectd2	88.2345	-5.91e-06	0.00144269	0.0588238	0.539907	60.3318	67.8697	70.4373	286.273	104.58	75.9507	82.9619	55.4373	83.5306	64.8522	58.5691	69.0176	103.466	52.0056
Trhde	108.549	-6.98e-06	0.00144268	0.0593934	0.539907	55.7413	99.1942	118.463	151.138	131.056	217.172	122.201	61.9593	67.4107	121.598	112.138	71.7242	132.807	57.0793
Casp4	49.5449	-7.82e-06	0.00144268	0.0590817	0.539907	40.6584	39.6777	41.622	55.1208	90.0183	84.2579	50.4498	26.7403	43.9635	49.7972	49.998	31.1256	54.0494	36.1503
2610206C17Rik	58.0811	-8.63e-06	0.00144268	0.0593996	0.539907	64.2664	52.2075	60.8322	78.236	111.199	52.8095	51.5709	30.6535	49.8253	78.749	34.2843	40.5986	67.9478	39.9555
Esco1	488.516	-1.06e-05	0.00144265	0.0595342	0.539907	407.239	456.293	537.084	522.759	648.661	679.996	512.346	349.581	405.93	462.072	411.412	433.052	642.415	370.382
Cox20	552.792	-1.08e-05	0.00144267	0.0595376	0.539907	430.847	608.739	562.698	682.787	691.023	844.359	493.287	414.801	685.831	434.278	439.268	613.039	474.09	364.039
Jmjd1c	1478.85	-1.08e-05	0.00144267	0.0590783	0.539907	1205.98	1382.45	1357.52	1986.13	2054.53	1792.56	1788.17	1350.71	970.128	1286.62	1103.53	1096.16	2083.22	1246.23
Akap11	1762.8	-1.32e-05	0.00144266	0.0589731	0.539907	1668.3	1694.65	2181.96	1690.96	2176.32	2039.4	2094.23	1766.17	1219.25	1753.32	1093.53	1395.24	1993.65	1912.16
Rnf2	607.598	-1.95e-05	0.00144272	0.0588478	0.539907	426.257	535.648	599.517	810.809	828.698	955.911	637.91	426.541	514.373	533.872	490.694	512.896	818.462	414.777
Gtf2h1	703.54	-2.47e-05	0.0014426	0.058861	0.539907	715.456	671.388	777.212	748.576	795.603	731.026	766.837	673.074	546.613	655.47	591.405	707.769	736.616	732.518
Atp13a3	5848.37	2.14e-05	0.00144266	0.0600851	0.539971	5114.43	5916.15	6769.99	6015.28	6630.91	7550.57	5919.45	4370.41	5757.75	5812.37	4840.52	5709.52	6451.95	5017.91
Sirt7	788.639	1.68e-05	0.00144268	0.0598169	0.539971	627.581	801.906	683.562	668.562	626.157	755.947	784.775	721.337	1018.49	853.501	1298.52	878.283	724.262	598.065
Ano1	56.2995	1.11e-05	0.00144267	0.0596912	0.539971	43.2815	55.3399	61.6326	60.4551	48.9805	46.2825	35.8754	74.3511	54.2216	66.0102	72.1399	39.2453	69.492	60.8846
Ctf1	164.483	9.97e-06	0.00144265	0.0599163	0.539971	181.651	166.02	152.881	103.129	133.704	137.661	158.076	140.224	211.025	147.075	219.277	169.161	208.476	174.409
Spatc1l	54.648	3.38e-06	0.00144268	0.0600596	0.539971	68.2011	66.8255	60.0318	8.89045	30.4474	35.0085	24.6644	97.1783	71.807	63.6941	63.5689	60.8979	23.164	90.6927
Rbm43	147.618	2.71e-06	0.00144266	0.0597734	0.539971	156.731	164.976	150.48	69.3455	87.3707	122.827	142.381	161.094	180.25	192.24	179.993	193.52	94.2003	171.238
Slc7a11	19.2486	-3.47e-06	0.00144269	0.059704	0.539971	72.1358	21.9271	38.4203	17.7809	5.29519	14.8341	6.72664	14.3485	13.189	6.94845	10.7139	4.05986	24.7083	18.3922
Asb4	18.3422	-3.63e-06	0.00144269	0.0601648	0.539971	11.804	15.6622	8.00424	69.3455	30.4474	27.2948	7.84775	5.86983	4.39635	17.3711	7.14257	6.76643	30.8854	13.9527
Oaz3	6.85351	-4.68e-06	0.00144269	0.060079	0.539971	8.52514	5.22075	5.60297	7.11236	7.94279	16.6142	7.84775	3.26102	5.8618	3.47422	3.57128	8.11972	7.72134	5.07372
Emp1	53.4751	-5.57e-06	0.00144269	0.0601285	0.539971	128.533	90.841	40.8216	64.0113	38.3901	36.1953	60.5398	50.8718	32.2399	20.8453	25.7132	28.419	49.4166	81.8137
4933426M11Rik	2802.35	-9.51e-06	0.00144268	0.059894	0.539971	2465.08	2604.11	2257.2	4242.52	4124.96	3595.79	2927.21	2025.74	2124.9	1964.09	2059.2	2300.59	4240.56	2300.93
Socs7	654.818	-1.01e-05	0.00144261	0.0599318	0.539971	620.368	560.708	710.776	823.256	708.232	764.254	755.626	648.942	492.391	639.257	524.265	561.614	762.868	594.894
Fggy	875.094	-1.22e-05	0.00144264	0.0598685	0.539971	828.25	1020.13	854.052	906.826	1023.3	1067.46	969.758	945.042	580.318	636.941	785.683	709.122	1023.85	900.585
Heatr6	386.724	-1.24e-05	0.00144266	0.0601793	0.539971	384.943	373.805	363.392	355.618	471.272	603.452	434.99	448.063	274.039	323.103	292.845	353.208	307.309	428.095
Zfp568	503.074	-1.52e-05	0.00144265	0.0595957	0.539971	413.141	407.218	526.679	729.017	589.09	558.357	611.004	502.196	419.119	478.285	497.123	426.285	444.749	440.779
Fgfr1op2	1506.4	-1.71e-05	0.00144263	0.0599714	0.539971	1341.07	1582.93	1580.84	1719.41	1834.78	1891.05	1357.66	1177.88	1658.89	1400.11	1489.23	1411.48	1428.45	1215.79
Ppp2r5e	1775.76	-2.02e-05	0.0014427	0.060126	0.539971	1440.75	1760.44	1706.5	1920.34	2102.19	2489.17	2218.67	1847.04	1191.41	1348	1420.66	1607.7	1973.57	1834.15
4930413G21Rik	431.377	1.46e-05	0.00144266	0.0603255	0.540612	423.634	381.114	420.223	296.941	454.063	381.534	381.177	403.061	653.591	523.45	464.267	458.764	441.661	355.795
Naa15	1642.19	-3.53e-05	0.00144283	0.0603206	0.540612	1386.97	1539.08	1655.28	2133.71	2169.71	2140.86	1483.23	1355.93	1568.03	1636.36	1283.52	1576.58	1765.1	1296.34
Lrsam1	306.755	8.95e-06	0.00144267	0.0604998	0.541011	320.676	360.231	329.775	151.138	203.865	211.238	283.64	470.891	279.901	303.415	374.271	353.208	236.273	416.045
Baz2b	452.821	-1.33e-05	0.00144266	0.060434	0.541011	397.403	539.825	474.651	490.753	481.863	544.116	547.1	566.764	332.657	340.474	354.271	328.849	501.887	438.877
Slc25a17	833.637	-1.43e-05	0.00144258	0.0604877	0.541011	796.117	897.968	819.634	1141.53	828.698	824.778	910.339	723.293	735.656	792.123	789.968	726.715	928.105	755.984
Sumf2	151.7	-2.9e-05	0.00144281	0.0605196	0.541011	180.339	148.269	133.671	106.685	105.904	129.354	112.111	156.529	224.214	166.763	219.991	220.586	84.9347	134.454
Surf4	7241.65	1.39e-05	0.00144265	0.0606121	0.541169	6864.05	6589.62	6173.67	8364.14	6595.16	5601.96	5891.42	5899.18	9268.97	8574.38	10053.9	8348.43	6932.22	6226.09
Larp4	3301.37	-9.65e-06	0.00144268	0.0606069	0.541169	2318.18	3016.55	3591.5	4459.45	4199.09	4608.67	4029.26	2133.36	2875.21	2471.33	2545.61	2638.91	5116.16	2215.95
Bad	451.615	8.73e-06	0.00144268	0.0606856	0.541491	411.174	444.807	377.8	366.287	381.254	429.003	294.851	279.143	677.038	537.346	833.538	549.434	444.749	296.178
Dpy19l1	2209.22	0.000111305	0.0014448	0.0616235	0.541554	1734.54	2011.03	1941.03	3321.47	3069.89	2888.5	2160.37	1573.11	2299.29	1916.61	1929.21	2046.17	2378.17	1659.74
Tbc1d14	558.377	3.11e-05	0.0014427	0.0616928	0.541554	546.92	522.075	567.501	501.422	487.158	498.427	541.495	543.285	652.125	627.676	617.118	667.17	449.382	595.528
Atxn7l3	937.224	2.31e-05	0.00144258	0.0610251	0.541554	967.275	881.262	870.861	905.048	935.925	855.039	787.017	963.304	1050.73	1121.02	1048.53	986.546	816.918	931.662
Rfc1	584.869	2.27e-05	0.00144268	0.061903	0.541554	535.772	646.328	596.316	435.632	548.052	506.14	505.619	801.558	514.373	702.951	551.406	619.805	586.822	637.386
Hgs	673.231	1.69e-05	0.00144262	0.0610993	0.541554	702.996	608.739	618.728	609.885	672.49	495.46	669.301	840.038	631.609	833.813	670.687	734.835	591.455	745.203
Rbm45	221.343	1.65e-05	0.00144264	0.0618192	0.541554	220.342	218.227	236.925	190.256	189.303	176.823	198.436	241.967	290.159	260.567	219.277	216.526	183.768	256.223
C330013E15Rik	42.8173	1.49e-05	0.00144271	0.0620436	0.541554	44.593	60.5606	44.8237	17.7809	26.476	20.7678	30.2699	52.1762	58.618	55.5876	54.9978	63.6045	21.6197	47.5661
Pnkp	211.594	1.47e-05	0.00144264	0.0613905	0.541554	200.013	250.596	207.31	179.587	165.475	175.043	180.498	223.053	262.316	264.041	249.276	213.819	202.299	188.996
Nans	269.56	1.46e-05	0.00144264	0.0614207	0.541554	286.576	277.744	238.526	231.152	198.57	259.894	233.19	279.143	244.73	297.625	312.13	259.831	395.333	259.394
Tmem82	283.546	1.42e-05	0.00144265	0.0618871	0.541554	289.199	245.375	231.322	343.172	244.903	221.919	241.038	272.621	369.293	320.787	352.129	328.849	257.893	251.149
E130311K13Rik	269.536	1.35e-05	0.00144266	0.0612172	0.541554	249.196	293.406	281.749	184.921	223.722	258.114	211.889	230.88	351.708	275.622	367.128	330.202	273.335	241.636
Ppp2r1a	823.978	1.26e-05	0.0014426	0.0621155	0.541554	870.876	727.772	753.199	737.908	788.984	599.299	880.069	983.522	867.546	856.975	779.254	973.013	730.439	986.838
0610005C13Rik	3731.78	1.15e-05	0.00144267	0.0609806	0.541554	3252.01	3910.34	3530.67	3280.58	2926.92	3195.86	3115.56	3187.32	4811.07	4092.63	6122.61	5022.05	2839.91	2957.34
Dbndd1	23.2271	1.14e-05	0.00144269	0.0616019	0.541554	17.0503	22.9713	23.2123	17.7809	10.5904	18.9877	26.9066	36.5234	20.5163	27.7938	22.8562	32.4789	13.8984	33.6134
E230016M11Rik	41.7172	1.13e-05	0.00144268	0.0611782	0.541554	26.887	41.766	33.6178	23.1152	23.8284	52.8095	48.2076	54.1329	42.498	52.1133	58.5691	40.5986	37.0624	48.8345
Fancf	242.342	1.06e-05	0.00144267	0.0620904	0.541554	238.704	216.139	227.32	200.924	184.008	171.483	250.007	195.009	381.017	296.467	350.7	307.196	168.325	205.486
Mthfsd	214.807	1.05e-05	0.00144267	0.0610788	0.541554	189.52	172.285	187.299	183.143	203.865	226.072	163.682	175.443	329.726	274.464	319.273	224.646	206.932	150.943
Itga5	278.974	9.68e-06	0.00144268	0.0617978	0.541554	302.315	262.081	282.55	252.489	267.407	158.428	178.256	444.802	285.763	350.896	264.275	301.783	179.135	375.455
Polr3h	311.908	8.75e-06	0.00144267	0.0615126	0.541554	298.38	326.819	295.356	272.048	250.198	243.873	223.1	236.75	507.046	379.848	459.981	388.393	247.083	237.831
2210417A02Rik	47.1323	7.72e-06	0.00144268	0.0616382	0.541554	45.2488	55.3399	43.2229	23.1152	46.3329	32.0417	24.6644	33.9146	90.8579	72.9587	64.2831	56.838	35.5182	35.516
Ppfibp1	934.746	7.65e-06	0.00144263	0.0611437	0.541554	904.976	1065.03	904.479	713.014	773.098	774.935	798.228	1331.8	917.372	964.676	788.54	1028.5	829.272	1292.53
Unc119	215.578	7.37e-06	0.00144269	0.061062	0.541554	333.136	306.98	134.471	92.4607	116.494	86.6313	155.834	268.055	235.937	185.292	289.988	235.472	253.26	324.084
Ptcd2	328.598	6.66e-06	0.00144261	0.0618428	0.541554	316.086	302.803	342.581	270.27	307.121	278.882	292.609	277.186	369.293	430.804	422.126	391.1	277.968	321.547
Sp5	114.011	5.81e-06	0.00144269	0.0613891	0.541554	160.666	142.004	100.053	49.7865	41.0377	58.7432	75.1142	211.314	158.269	116.965	80.711	177.281	58.6822	165.53
Prr18	7.60899	4.18e-06	0.00144269	0.0608535	0.541554	5.24624	4.1766	9.60509	3.55618	0	4.74692	8.96886	10.4352	16.1199	5.79037	14.9994	13.5329	6.17707	3.17107
Gm15441	54.8721	4.16e-06	0.00144269	0.0612142	0.541554	86.563	75.1787	36.8195	23.1152	13.238	13.6474	20.1799	43.6976	175.854	107.701	47.8552	50.0716	32.4296	41.8582
H19	22.1387	2.02e-06	0.00144269	0.0620836	0.541554	23.6081	25.0596	16.0085	3.55618	2.6476	3.56019	1.12111	64.5681	4.39635	6.94845	5.71406	10.8263	16.9869	124.94
St5	565.804	-1.91e-06	0.00144267	0.0608648	0.541554	668.896	447.94	415.42	817.922	1032.56	469.945	710.782	616.332	369.293	342.79	325.701	456.058	636.238	611.383
Cxcr2	19.7514	-2.02e-06	0.00144269	0.0620009	0.541554	13.7714	3.13245	6.40339	56.8989	58.2471	35.0085	34.7543	2.60881	2.9309	0	8.57108	4.05986	46.328	3.80529
Fgfr1	186.225	-5.8e-06	0.00144269	0.0615614	0.541554	140.337	131.563	116.061	488.975	138.999	290.156	272.429	120.658	109.909	187.608	112.853	94.7301	267.158	135.722
Rlf	710.451	-6.22e-06	0.00144269	0.0609744	0.541554	468.227	513.721	574.704	1194.88	1016.68	1044.92	1143.53	451.325	344.381	462.072	470.695	435.758	1346.6	478.832
Ndufa9	573.109	-7.43e-06	0.00144251	0.0617058	0.541554	566.594	617.092	605.921	627.666	664.547	503.174	661.453	532.85	514.373	491.023	502.837	613.039	566.746	556.206
4930404H11Rik	62.306	-7.88e-06	0.00144268	0.0608077	0.541554	34.7563	60.5606	67.2356	62.2332	51.6281	102.059	131.17	54.1329	45.4289	35.9003	61.4261	51.4249	64.8592	49.4688
Naca	312.855	-1.04e-05	0.00144264	0.0612554	0.541554	299.036	273.567	326.573	291.607	374.635	351.272	475.35	285.665	246.196	253.618	325.701	281.484	353.637	241.636
Jhdm1d	1127.51	-1.93e-05	0.00144271	0.0612977	0.541554	910.223	1008.65	1218.25	1356.68	1389.99	1376.01	1473.14	948.955	844.099	910.246	768.54	979.78	1556.62	1043.92
St13	1961.33	-2.01e-05	0.00144255	0.0619033	0.541554	1821.76	1861.72	2118.72	2187.05	2234.57	2016.25	2231	1939	1626.65	1788.07	1738.5	1931.14	2132.63	1831.61
Arfgef1	2592.54	-2.27e-05	0.00144265	0.0620132	0.541554	2438.85	2604.11	2848.71	2444.87	2932.21	3218.41	2890.21	2527.29	2032.58	2501.44	1949.21	2514.41	2779.68	2613.6
Snw1	684.037	-3.57e-05	0.00144279	0.0620004	0.541554	678.732	603.518	678.759	764.579	881.65	862.753	653.606	606.549	659.452	663.577	642.117	638.751	710.363	532.106
Smurf1	509.022	6.16e-06	0.00144267	0.0621563	0.541583	573.807	507.456	472.25	327.169	346.835	326.944	538.132	815.906	386.879	508.395	410.698	546.728	559.025	806.087
Acot12	2953.71	6.32e-05	0.00144329	0.0628148	0.541732	2412.61	2732.54	2837.5	3965.14	3764.88	3301.48	3275.88	2634.25	2475.15	2618.41	2621.32	2774.24	3286.2	2652.29
Ubxn4	2991.6	2.75e-05	0.00144252	0.0627779	0.541732	2751.65	3085.46	2931.95	3029.87	2740.26	2665.99	2791.56	3571.46	3114.08	3305.14	2881.31	3145.04	2934.11	2934.51
Adh4	2169.59	1.31e-05	0.00144269	0.062471	0.541732	1594.86	2083.08	1895.4	1230.44	1755.36	2185.96	2303.88	1586.81	2308.08	2279.09	4400.54	2697.1	2501.71	1551.92
Cenpv	551.535	1.27e-05	0.00144266	0.0629423	0.541732	532.493	551.311	493.862	529.871	532.167	445.617	396.872	475.456	679.969	667.051	738.542	719.949	568.291	390.042
Tcirg1	510.695	1.17e-05	0.00144264	0.0629069	0.541732	531.838	502.236	459.443	371.621	442.149	515.634	431.626	639.811	521.7	492.182	724.257	595.446	381.434	540.351
Arl2bp	207.956	9.75e-06	0.00144267	0.0624492	0.541732	172.47	173.329	169.69	257.823	123.113	216.578	168.166	172.182	345.846	196.873	264.989	244.945	220.83	184.557
Bmf	380.333	9.48e-06	0.00144267	0.0629503	0.541732	287.887	348.746	320.97	245.377	309.769	478.846	324	275.882	438.17	485.233	667.83	465.531	378.346	298.081
Exog	39.4027	9.42e-06	0.00144268	0.0622268	0.541732	43.2815	39.6777	42.4225	23.1152	23.8284	29.0749	35.8754	60.6549	49.8253	47.481	34.2843	44.6585	32.4296	45.0293
Rnf26	413.48	9.26e-06	0.00144267	0.0627862	0.541732	498.393	476.132	436.231	286.273	242.255	266.421	319.516	542.633	420.584	513.027	435.697	507.483	287.234	556.841
Armc9	42.2363	9.04e-06	0.00144268	0.0628992	0.541732	35.4121	50.1192	37.6199	21.3371	27.7998	33.8218	48.2076	46.9586	36.6362	59.0618	46.4267	50.0716	29.3411	68.4952
2021-03-03	25.5832	6.96e-06	0.00144268	0.0628904	0.541732	31.4774	15.6622	22.4119	16.0028	17.2094	20.7678	22.4221	21.5227	26.3781	48.6391	44.2839	32.4789	15.4427	23.466
Zfp30	42.3759	6.67e-06	0.00144268	0.0624659	0.541732	41.3141	53.2516	54.4288	23.1152	23.8284	23.1412	22.4221	59.3505	60.0834	66.0102	52.855	47.365	18.5312	47.5661
Cacna1g	4.91566	4.1e-06	0.00144269	0.0629075	0.541732	5.24624	5.22075	4.80254	1.77809	0	2.37346	4.48443	7.82644	4.39635	6.94845	4.9998	4.05986	4.6328	12.0501
E130102H24Rik	214.253	-1.63e-06	0.00144267	0.0624977	0.541732	133.779	207.786	225.72	286.273	303.15	351.866	215.253	141.528	250.592	138.969	249.276	208.406	179.135	107.817
Eml4	476.537	-2.86e-06	0.00144265	0.0624118	0.541732	473.473	466.735	482.656	778.804	587.766	412.389	543.737	560.242	279.901	405.326	286.417	389.747	484.9	519.422
Erbb4	32.0251	-4.29e-06	0.00144269	0.0629598	0.541732	35.4121	24.0154	39.2208	8.89045	38.3901	33.8218	106.505	33.2624	11.7236	10.4227	13.5709	13.5329	47.8723	31.7107
Cyp2c44	2624.65	-8e-06	0.00144268	0.0624811	0.541732	2059.8	1754.17	2308.42	4443.45	4179.23	2961.49	3491.13	1567.24	1903.62	3105.96	2715.6	2414.26	2520.24	1320.44
Klhl2	887.609	-9.29e-06	0.00144267	0.0623448	0.541732	624.958	870.82	901.277	1516.71	955.782	1297.1	822.893	600.027	942.284	883.611	819.967	803.852	846.259	540.985
Eif4e3	312.535	-1.01e-05	0.00144269	0.0629108	0.541732	276.083	350.834	232.923	535.205	254.169	568.444	324	197.618	222.748	214.244	318.559	220.586	467.913	192.167
Hnrnph1	1428.76	-1.98e-05	0.0014427	0.0628732	0.541732	1124.66	1487.91	1558.43	1639.4	1539.58	2224.53	1417.08	1424.41	1409.76	1136.07	1069.24	1093.46	1707.96	1170.13
Myl12b	932.589	-2.19e-05	0.0014426	0.0627726	0.541732	1020.39	1008.65	870.861	1214.44	1068.31	854.446	886.796	830.254	917.372	925.301	846.394	829.565	923.472	859.995
AI480653	83.992	1.07e-05	0.00144267	0.0630592	0.542264	91.8092	89.7968	97.6517	53.3427	43.6853	64.6768	75.1142	90.004	112.84	105.385	98.5675	78.4906	78.7577	95.7665
Slc20a2	2554.79	3.33e-05	0.00144261	0.0632406	0.542442	2381.14	2235.52	2303.62	2676.03	2546.99	2255.38	2641.33	2397.5	2662.72	2995.94	2714.89	2758	2648.42	2549.54
Ppp1r14b	516.419	8.07e-06	0.00144268	0.0632453	0.542442	552.822	450.028	433.83	515.646	455.387	386.281	311.668	376.973	910.044	582.511	848.537	610.332	432.395	363.405
Wisp1	29.4177	7.06e-06	0.00144268	0.0632674	0.542442	37.3795	15.6622	31.2165	26.6714	15.8856	20.1744	22.4221	35.219	42.498	27.7938	31.4273	14.8862	38.6067	52.0056
Stk36	15.0214	4.49e-06	0.00144269	0.0631266	0.542442	14.4272	5.22075	15.2081	10.6685	11.9142	11.8673	11.2111	25.4359	16.1199	39.3745	8.57108	13.5329	7.72134	19.0264
Gm5617	493.049	-6.25e-06	0.00144267	0.0631887	0.542442	433.471	415.571	360.191	501.422	477.891	388.654	423.779	363.929	763.499	482.917	854.966	669.877	389.155	377.358
C730036E19Rik	3927.33	-7.45e-06	0.00144268	0.0634831	0.543647	4496.03	5221.79	4748.91	2428.87	3591.46	6172.18	5229.97	5593.95	2058.96	1884.19	3229.16	3611.92	2486.27	4228.95
Heatr1	444.047	-9.61e-06	0.00144263	0.0634539	0.543647	415.764	400.953	466.647	485.419	546.729	614.726	441.716	337.841	435.239	524.608	414.269	376.214	418.497	338.037
Tmem51	160.69	1.01e-05	0.00144267	0.063543	0.543838	220.342	137.828	154.482	103.129	107.228	121.64	137.896	180.008	183.181	186.45	241.419	163.748	108.099	204.217
Elovl2	20266.5	2.99e-05	0.00144279	0.0644442	0.543891	18776.9	17398.7	19972.2	24203.4	27871.2	26462.3	21586.9	12566.6	18532.1	18193.3	17505.7	19130.1	25951.4	15580.8
Rwdd2b	248.195	1.5e-05	0.00144262	0.063665	0.543891	215.752	224.492	216.114	224.039	234.312	267.608	226.464	200.879	263.781	252.46	312.13	285.544	284.145	267.004
Inhbc	1630.07	1.4e-05	0.00144265	0.0642612	0.543891	1745.69	1457.63	1387.93	1520.27	1629.6	1188.51	1485.47	1558.77	2135.16	1966.41	2145.63	1828.29	1243.14	1528.46
Tmem175	221.464	1.28e-05	0.00144263	0.0641581	0.543891	238.704	226.58	228.121	144.025	181.36	199.964	196.194	210.009	265.246	240.879	224.277	295.017	208.476	241.636
Pithd1	757.811	1.28e-05	0.00144267	0.0642951	0.543891	722.014	800.862	722.783	672.118	593.062	653.888	593.066	607.201	1014.09	822.233	1159.24	960.834	681.022	606.944
Dusp23	386.077	1.23e-05	0.00144265	0.0645494	0.543891	457.734	340.393	391.407	320.056	320.359	283.629	339.696	511.979	444.031	346.264	425.697	488.537	299.588	435.706
8430410A17Rik	127.012	1.15e-05	0.00144267	0.0643901	0.543891	125.254	147.225	114.461	145.803	86.0469	90.1915	86.3253	135.006	156.803	126.23	159.279	174.574	114.276	116.696
Zfp316	227.586	1.05e-05	0.00144268	0.0646119	0.543891	265.591	209.874	248.932	174.253	145.618	131.727	208.526	308.492	205.163	350.896	207.135	265.244	159.06	305.692
Wdr20b	59.794	1e-05	0.00144268	0.0639792	0.543891	51.8066	48.0309	47.225	49.7865	47.6567	68.237	42.6021	47.6108	101.116	56.7456	105.71	75.7841	47.8723	46.9319
Oaf	10830.7	9.15e-06	0.00144268	0.063841	0.543891	8655.64	10182.5	8593.35	12695.6	9498.25	9468.33	6559.6	6954.44	14966.6	15004	16320.1	12260.8	13432	7038.52
Ttc30a1	80.1244	8.45e-06	0.00144268	0.0639275	0.543891	81.3167	99.1942	82.4437	37.3399	48.9805	69.4237	57.1765	67.8291	109.909	94.9621	110.71	121.796	52.5051	88.1559
Fam189b	17.5732	7.59e-06	0.00144269	0.0645221	0.543891	20.3292	11.4856	20.811	14.2247	7.94279	14.8341	8.96886	21.5227	30.7744	10.4227	29.2845	16.2394	16.9869	22.1975
Col4a5	26.2497	6.76e-06	0.00144268	0.0640233	0.543891	22.2965	37.5894	20.0106	21.3371	10.5904	17.801	21.301	29.3491	32.2399	15.055	24.999	31.1256	32.4296	51.3714
Lax1	8.12417	6.03e-06	0.00144269	0.0643423	0.543891	7.86936	4.1766	6.40339	3.55618	5.29519	7.71375	6.72664	7.82644	20.5163	6.94845	16.4279	6.76643	4.6328	8.87901
Rnf43	791.669	5.88e-06	0.00144269	0.0645029	0.543891	855.793	779.979	817.233	357.396	309.769	513.854	819.529	1644.2	690.227	892.875	840.68	855.277	336.65	1369.9
Mab21l2	31.1776	5.74e-06	0.00144269	0.0647525	0.543891	22.9523	28.192	36.0191	14.2247	34.4188	13.6474	22.4221	38.48	46.8944	54.4295	39.9984	44.6585	4.6328	35.516
Doc2b	7.2041	5.07e-06	0.00144269	0.0643773	0.543891	7.21358	7.30904	5.60297	7.11236	1.3238	5.34029	2.24221	5.21762	5.8618	11.5807	4.28554	10.8263	12.3541	14.5869
Mdfi	18.9348	4.22e-06	0.00144268	0.0636241	0.543891	20.3292	20.883	9.60509	12.4466	13.238	16.6142	13.4533	10.4352	29.309	27.7938	27.856	20.2993	23.164	19.6607
Rmnd5a	5822.67	-2.21e-06	0.00144265	0.0647499	0.543891	5238.37	5516.24	6249.71	6073.96	7806.44	6926.94	7741.25	6352.46	3415.96	4360.15	3242.73	5432.09	6237.3	6923.72
Nmnat2	7.2848	-4.45e-06	0.00144269	0.0636346	0.543891	3.93468	9.39734	4.80254	16.0028	13.238	8.90048	10.09	5.21762	5.8618	3.47422	2.14277	5.41315	4.6328	8.87901
Fam228a	17.901	-4.49e-06	0.00144269	0.064169	0.543891	16.3945	25.0596	39.2208	3.55618	13.238	20.7678	40.3599	17.6095	16.1199	10.4227	17.1422	20.2993	1.54427	8.87901
Rbbp8	124.838	-1e-05	0.00144269	0.0641849	0.543891	117.385	110.68	128.868	234.708	160.18	151.308	107.626	115.44	65.9452	98.4363	89.9964	67.6643	196.122	103.377
C6	2846.12	-1e-05	0.0014427	0.0647069	0.543891	1227.62	3089.64	1903.41	6134.41	3497.47	4670.97	3750.1	1149.18	1696.99	4011.57	2081.34	2124.66	3488.5	1019.82
Cep85	1321.92	-1.28e-05	0.00144266	0.0646923	0.543891	1035.48	1426.31	1385.53	1317.57	1528.99	1621.67	1827.41	1392.45	1085.9	910.246	1385.66	1452.08	928.105	1209.45
Cdc73	266.409	-1.33e-05	0.00144266	0.0641541	0.543891	209.85	257.905	291.354	263.157	364.045	355.426	295.972	202.835	291.625	211.928	227.848	251.711	298.044	208.022
Nvl	211.608	-1.39e-05	0.00144265	0.0638509	0.543891	218.375	225.536	228.121	197.368	231.665	231.412	284.761	241.967	162.665	196.873	149.994	192.167	160.604	241.002
Mtcp1	172.001	-1.41e-05	0.00144265	0.0640663	0.543891	171.814	217.183	200.906	168.919	161.503	244.466	142.381	168.921	158.269	132.02	164.993	178.634	145.161	152.846
Otud6b	1370.57	-1.89e-05	0.00144271	0.064004	0.543891	1282.71	1394.98	1351.12	1804.76	1806.98	1841.21	1163.71	819.167	1197.27	1360.74	1154.24	1327.57	1737.3	946.249
Psip1	518.531	-2.04e-05	0.00144266	0.0645745	0.543891	437.405	522.075	528.28	631.222	589.09	710.851	483.197	451.977	534.889	478.285	424.983	499.363	521.962	445.853
Syncrip	1813.91	-2.12e-05	0.00144271	0.0642926	0.543891	1306.31	1873.2	1911.41	2363.08	2324.59	2366.34	1820.68	1400.28	1862.59	1639.83	1317.09	1649.66	2178.96	1380.69
Cnot2	516.303	-2.15e-05	0.00144262	0.0639968	0.543891	485.933	508.501	567.501	547.652	614.242	587.432	535.889	549.155	429.377	463.23	430.697	558.907	427.762	521.959
Uri1	1165.67	-2.53e-05	0.00144253	0.064153	0.543891	1055.81	1276.99	1247.06	1234	1268.2	1254.97	1201.83	1001.13	1244.17	1082.8	1110.67	1115.11	1178.28	1048.36
Cct8	932.492	1.12e-05	0.00144257	0.064853	0.544099	855.793	997.162	889.271	1088.19	1119.93	951.164	1060.57	967.217	722.467	882.453	730.685	903.996	943.548	942.443
Dusp11	1660.51	-1.23e-07	0.00144257	0.0648864	0.544099	1608.63	1674.82	1802.55	1493.6	1690.49	2364.56	1812.83	1692.47	1415.62	1442.96	1581.36	1411.48	1471.69	1784.05
Thbd	396.481	-9.63e-06	0.00144271	0.0648901	0.544099	148.206	99.1942	163.286	1655.4	602.328	813.504	432.747	118.701	191.974	104.227	114.281	96.0834	847.803	162.993
Dcun1d4	1404.56	-3.8e-06	0.00144258	0.064941	0.544133	1253.85	1601.72	1459.97	1057.96	1053.74	1332.7	1356.54	1472.02	1395.11	1673.42	1427.8	1557.63	1306.45	1714.92
Pawr	309.538	-1.75e-05	0.00144268	0.0649694	0.544133	318.053	268.346	277.747	357.396	459.358	354.239	340.817	245.228	294.555	277.938	245.704	223.292	396.877	273.981
Taf13	451.182	3.08e-05	0.0014428	0.0650819	0.544759	432.815	462.558	457.042	633	567.909	540.556	372.208	347.624	351.708	400.694	418.555	449.291	566.746	315.839
Ric8	657.673	1.25e-05	0.00144265	0.065228	0.54486	581.021	682.873	632.335	558.321	524.224	577.344	616.609	648.29	854.357	763.171	944.962	770.02	457.103	596.796
Wnt5a	53.9238	5.63e-06	0.00144269	0.0653321	0.54486	61.6433	55.3399	66.4352	17.7809	23.8284	15.4275	51.5709	79.5688	63.0143	91.4879	39.9984	55.4848	29.3411	104.011
Cyp2c70	6697.13	-4.58e-06	0.00144269	0.0651964	0.54486	3347.76	2851.57	5801.47	17448.4	9907.31	14220	5275.93	2072.05	3890.77	7883.01	8124.67	5142.49	5832.7	1961.63
Gpd1	12434.6	-5.54e-06	0.00144265	0.0653755	0.54486	13436.9	12882.7	10792.1	8849.56	8530.56	7236.68	15650.7	15059.4	15325.7	13815.8	12728.8	14878	9900.3	14997.3
Ccne1	22.2895	-6.03e-06	0.00144269	0.0653953	0.54486	32.1332	25.0596	13.6072	60.4551	17.2094	19.5811	23.5433	22.8271	10.2581	9.26459	22.8562	16.2394	23.164	15.8554
Klhl15	93.8924	-1.07e-05	0.00144267	0.0653836	0.54486	77.382	77.267	92.0487	120.91	153.561	97.3119	118.837	70.4379	101.116	90.3298	58.5691	69.0176	95.7446	91.9612
Acrbp	70.2883	-1.11e-05	0.00144267	0.0651596	0.54486	68.2011	95.0176	64.8343	72.9017	82.0755	100.872	65.0242	79.5688	54.2216	57.9037	62.8546	70.3709	41.6952	68.4952
Casp8	648.803	-1.86e-05	0.00144259	0.0652587	0.54486	754.803	620.225	652.345	666.784	753.241	579.124	792.623	600.679	614.024	606.831	702.115	592.74	577.556	570.159
Prmt3	152.136	1.75e-05	0.00144262	0.0657596	0.546494	132.468	133.651	149.679	158.25	148.265	115.706	158.076	161.094	175.854	176.027	167.85	158.335	140.528	154.114
Mxd4	964.473	1.34e-05	0.00144264	0.0658559	0.546494	941.044	857.246	890.872	764.579	912.097	1009.91	791.502	821.124	1241.24	1178.92	1369.23	996.019	891.042	837.798
Stil	4.24128	3.6e-06	0.00144269	0.0657641	0.546494	4.59046	4.1766	0.800424	1.77809	1.3238	3.56019	3.36332	9.13084	2.9309	1.15807	5.71406	2.70657	9.26561	8.87901
Aacs	1419.03	-3.09e-06	0.00144269	0.0657555	0.546494	1447.96	792.509	1252.66	1418.92	2148.52	1901.14	4388.01	948.955	233.007	164.447	723.542	627.925	2866.16	952.591
Gphn	1199.11	-1.43e-05	0.00144263	0.0656962	0.546494	1054.49	1159.01	1134.2	1411.8	1593.85	1355.84	1341.97	1245.06	833.841	999.418	1072.81	1178.71	1209.16	1197.4
Zfp451	248.919	-1.71e-05	0.0014426	0.0658245	0.546494	223.621	246.419	296.957	243.598	255.493	288.375	300.457	257.62	224.214	245.512	220.705	234.119	213.109	234.66
Hs6st1	6343.03	-2.35e-05	0.00144273	0.0658068	0.546494	5928.91	5345	6320.95	8029.86	8304.19	6747.75	8143.72	6259.19	4243.94	4824.54	4966.94	5587.72	8190.8	5908.98
Gm14873	17.1484	4.74e-06	0.00144269	0.0659564	0.547015	13.7714	20.883	12.0064	5.33427	7.94279	16.0209	14.5744	22.1749	21.9817	12.7388	27.1418	46.0118	6.17707	13.3185
Dusp12	437.542	5.35e-05	0.00144311	0.0661291	0.547223	381.664	452.117	378.6	321.834	411.701	480.032	372.208	420.671	586.18	438.91	562.12	521.015	437.028	361.503
Chp2	25.7725	6.44e-06	0.00144269	0.0660668	0.547223	28.8543	28.192	30.4161	14.2247	10.5904	11.8673	21.301	26.7403	30.7744	48.6391	25.7132	20.2993	20.0755	43.1266
3930402G23Rik	19.8612	2.23e-06	0.00144269	0.0661652	0.547223	7.21358	10.4415	8.80466	40.8961	10.5904	8.90048	8.96886	9.13084	61.5489	59.0618	19.9992	10.8263	7.72134	13.9527
Nrip1	356.108	-7.32e-06	0.00144268	0.0661707	0.547223	443.963	324.73	415.42	211.593	440.825	352.459	713.024	436.324	187.578	294.151	199.278	217.879	311.942	436.34
Nfkbiz	515.999	-8.65e-06	0.00144268	0.0660739	0.547223	485.277	403.042	409.817	782.36	524.224	859.193	646.879	337.841	570.06	382.164	496.409	449.291	605.353	272.078
Dcp1b	56.2511	9.01e-06	0.00144265	0.0662341	0.547296	60.3318	52.2075	46.4246	53.3427	30.4474	54.5896	54.9343	58.0461	70.3416	66.0102	69.2829	60.8979	47.8723	62.7873
Enkd1	14.0614	6.44e-06	0.00144268	0.0662552	0.547296	11.1483	20.883	12.0064	3.55618	6.61899	8.90048	15.6955	17.6095	14.6545	20.8453	15.7137	21.6526	12.3541	15.2212
Gm16551	130.13	-4.95e-06	0.00144269	0.0663627	0.547871	103.613	113.812	226.52	181.365	150.913	198.184	146.865	33.9146	127.494	198.031	154.994	97.4367	63.315	25.3686
Harbi1	542.731	1.55e-05	0.00144265	0.0664719	0.54846	550.855	613.96	562.698	341.393	416.996	488.933	503.377	534.806	581.784	620.728	597.119	707.769	523.507	554.304
Cited2	773.011	7.6e-06	0.00144268	0.0665634	0.548901	518.066	657.814	587.511	1018.85	604.976	505.547	705.177	676.987	754.707	889.401	615.689	818.739	1791.35	677.342
Pisd-ps2	352.685	1.05e-05	0.00144267	0.0666034	0.548918	308.217	357.099	316.167	279.16	258.141	359.579	307.183	454.586	460.151	334.683	592.119	339.675	223.919	346.916
Eif1	4775.12	2.33e-06	0.0014426	0.0666994	0.549148	4768.83	4397.96	4544.01	6057.96	6495.88	5146.26	4645.87	3492.55	4729.01	4884.76	4062.69	5032.87	4768.7	3824.32
Sik3	1374	-2.22e-05	0.00144275	0.0667072	0.549148	1233.52	1121.42	1295.09	2338.19	1923.48	1399.16	1633.45	1427.02	721.001	1075.85	831.395	1031.2	1746.57	1458.69
Cenpl	183.831	1.19e-05	0.00144266	0.0667534	0.549215	163.945	215.095	175.293	112.02	137.675	183.35	164.803	167.616	197.836	201.505	281.417	217.879	188.401	166.799
Med10	183.785	1.36e-05	0.00144265	0.0668104	0.549372	199.357	148.269	158.484	186.7	199.894	155.462	124.443	166.312	216.887	188.766	244.99	225.999	176.047	181.385
Lyrm5	1437.16	1.75e-06	0.00144261	0.0669031	0.54951	1399.43	1503.57	1412.75	1493.6	1769.92	1793.74	1513.49	1281.58	1090.29	1307.47	1012.82	1372.23	1846.94	1322.34
Inhba	124.337	-8.46e-06	0.00144268	0.066898	0.54951	133.123	106.503	175.293	85.3484	128.408	115.113	263.46	140.876	79.1343	137.811	97.1389	86.6104	69.492	122.403
2610507I01Rik	632.006	7.72e-06	0.00144268	0.0669898	0.549704	653.157	836.363	692.367	282.716	358.749	512.668	461.896	861.56	688.761	696.003	739.256	818.739	441.661	804.185
Synj2bp	4177.9	-1.29e-05	0.00144267	0.0670028	0.549704	3495.31	4157.8	4652.06	4983.99	5226.36	6011.38	3789.34	2501.85	3987.49	4176.02	4061.98	4178.95	4569.49	2698.58
Mrps27	382.743	1.77e-05	0.00144267	0.0670603	0.549864	398.714	370.673	372.197	396.514	284.617	300.836	327.363	352.842	512.907	409.958	501.408	424.932	384.523	320.913
Mettl20	1154.79	0.000210883	0.0014505	0.0676799	0.550047	1671.58	1618.43	1477.58	938.832	1289.38	1025.34	969.758	849.168	1103.48	749.274	1248.52	1004.14	1345.06	876.485
Pqlc1	2597.43	8.01e-05	0.00144373	0.0680318	0.550047	2310.31	2273.11	2502.93	1950.57	2520.51	2478.49	2552.76	2075.31	3342.69	3379.26	3137.02	3196.46	2625.26	2019.34
Casp9	688.137	2.38e-05	0.00144259	0.0673859	0.550047	659.059	694.359	641.94	670.34	618.214	564.29	711.903	662.638	741.518	691.37	783.54	817.385	634.694	742.666
Gps1	421.203	2.09e-05	0.00144268	0.0679688	0.550047	392.812	411.395	395.409	469.416	352.13	353.052	328.484	333.276	514.373	458.597	550.692	487.183	480.267	369.747
BC017158	299.028	1.63e-05	0.00144261	0.0686215	0.550047	323.3	308.024	282.55	282.716	207.836	240.906	303.82	340.45	326.795	341.632	309.987	320.729	288.778	308.863
Rgl2	339.058	1.62e-05	0.00144262	0.0675461	0.550047	299.691	316.377	283.35	343.172	321.683	354.239	294.851	390.017	369.293	306.89	456.41	364.034	311.942	334.865
Ptrh2	425.12	1.56e-05	0.00144261	0.0679888	0.550047	415.109	457.337	390.607	389.402	349.483	327.538	437.232	391.974	479.202	438.91	479.981	557.554	420.041	417.313
Rab4b	313.123	1.46e-05	0.00144264	0.0682507	0.550047	302.315	309.068	240.928	350.284	275.35	290.749	250.007	323.493	385.413	283.728	405.698	376.214	319.663	270.81
Sh3gl1	372.777	1.3e-05	0.00144254	0.0675912	0.550047	386.91	312.201	324.172	369.843	349.483	351.272	365.481	410.236	385.413	433.12	431.411	388.393	379.89	331.06
1700001C19Rik	228.493	1.29e-05	0.00144266	0.0672475	0.550047	188.865	211.962	180.896	188.478	203.865	196.404	270.187	208.705	272.574	243.196	347.129	239.532	273.335	173.775
Def8	1994.21	1.28e-05	0.00144267	0.0683927	0.550047	1781.75	1903.48	1905.01	1840.32	1580.62	1771.2	1655.88	1597.25	3124.34	2531.55	2790.6	2377.72	1457.79	1601.39
Cers4	68.8661	1.21e-05	0.00144265	0.0680726	0.550047	61.6433	71.0021	58.4309	72.9017	42.3615	69.4237	61.6609	82.8298	92.3233	75.2748	77.1397	60.8979	60.2264	78.0084
2900005J15Rik	131.406	1.18e-05	0.0014427	0.0684884	0.550047	133.779	148.269	128.068	69.3455	72.8089	83.0711	130.048	247.185	152.407	96.1202	140.709	169.161	66.4035	202.315
Ufl1	881.92	1.16e-05	0.0014426	0.0678583	0.550047	725.293	943.911	902.078	833.925	716.175	793.923	822.893	860.908	1024.35	1149.97	976.389	1016.32	772.134	808.624
Iffo1	198.21	1.12e-05	0.00144266	0.0671702	0.550047	209.194	201.521	163.286	144.025	132.38	160.209	229.827	271.316	222.748	243.196	204.277	217.879	132.807	242.27
Zmym3	285.493	9.58e-06	0.00144267	0.068515	0.550047	286.576	311.156	264.14	202.702	176.065	229.632	280.277	434.367	353.173	269.831	293.56	335.615	162.148	397.653
Tmem241	160.124	9.5e-06	0.00144267	0.0676412	0.550047	167.224	192.123	194.503	80.0141	121.789	113.926	113.232	161.094	199.301	157.498	184.278	219.232	149.794	187.728
Fbxl8	97.417	9.37e-06	0.00144267	0.0683477	0.550047	106.892	103.371	106.456	51.5646	63.5423	58.7432	103.142	110.875	108.443	111.175	142.137	116.383	69.492	111.622
Rab7l1	320.403	8.44e-06	0.00144268	0.0684641	0.550047	331.169	314.289	296.957	224.039	283.293	250.993	230.948	243.924	498.253	339.316	592.119	410.046	236.273	234.025
A830052D11Rik	17.3715	6.81e-06	0.00144268	0.0675956	0.550047	11.804	17.7505	15.2081	16.0028	15.8856	11.2739	12.3322	15.6529	24.9126	26.6357	29.9988	14.8862	20.0755	10.7817
Extl1	606.93	6.06e-06	0.00144269	0.0681811	0.550047	679.388	759.096	637.938	181.365	325.654	311.517	530.284	1102.22	402.999	698.319	514.265	951.361	449.382	953.225
Fam78a	32.6128	5.68e-06	0.00144269	0.0679814	0.550047	41.3141	26.1037	27.2144	23.1152	11.9142	17.2076	35.8754	58.0461	42.498	45.1649	27.1418	20.2993	18.5312	62.1531
Chst3	8.73717	4.18e-06	0.00144269	0.0676739	0.550047	8.52514	8.35319	7.20381	1.77809	0	7.12038	10.09	18.9139	16.1199	5.79037	12.1424	2.70657	7.72134	15.8554
Fam110c	68.8645	1.67e-06	0.00144268	0.0680723	0.550047	73.4474	55.3399	60.8322	55.1208	56.9233	54.5896	42.6021	70.4379	109.909	91.4879	59.9976	136.682	23.164	73.5689
Slc22a26	38.6553	-2.87e-06	0.00144269	0.0686651	0.550047	66.8896	31.3245	76.8407	5.33427	95.3135	33.8218	32.5121	30.0013	30.7744	12.7388	54.9978	21.6526	18.5312	30.4423
Hs3st1	6.61425	-4.06e-06	0.00144269	0.0685131	0.550047	9.8367	4.1766	16.0085	5.33427	11.9142	4.15356	6.72664	5.86983	5.8618	4.6323	2.85703	4.05986	9.26561	1.90264
Rbms1	560.752	-6.72e-06	0.00144264	0.0682258	0.550047	526.591	600.386	476.252	803.697	660.575	578.531	655.848	533.502	466.013	451.649	367.842	484.477	704.186	540.985
F9	8818.59	-8.61e-06	0.00144255	0.0685601	0.550047	8292.34	9207.31	9232.09	10183.1	10120.4	10356.6	8129.15	7098.58	8719.43	8788.63	7396.13	9177.99	9376.79	7381.63
Nhsl1	276.262	-9.43e-06	0.00144267	0.0686799	0.550047	295.757	306.98	268.142	446.301	250.198	261.674	350.907	312.405	162.665	301.099	152.137	200.286	247.083	312.034
Trpm7	1542.92	-1.01e-05	0.00144258	0.0676209	0.550047	1309.59	1709.27	1716.91	1541.6	1576.64	1851.89	1824.04	1472.02	1402.44	1393.16	1282.81	1249.08	1808.34	1463.13
Fxr1	790.941	-1.02e-05	0.00144263	0.067797	0.550047	670.863	815.48	807.628	871.264	1012.71	1020.59	810.561	671.117	578.853	724.954	657.116	747.014	1011.5	673.536
Fam222b	611.174	-1.06e-05	0.00144267	0.0672583	0.550047	717.423	608.739	654.747	663.228	716.175	650.922	756.747	774.817	356.104	513.027	384.984	572.44	421.585	765.497
Luc7l2	3296.83	-1.22e-05	0.00144266	0.0685086	0.550047	2493.28	3516.69	3304.15	3600.63	3489.53	4577.22	4299.45	3744.95	2728.67	2489.86	2277.77	2927.16	3579.61	3126.68
Zbtb1	397.417	-1.43e-05	0.00144261	0.0686792	0.550047	359.367	411.395	396.21	517.424	469.948	455.111	376.692	403.061	328.261	334.683	358.557	324.789	401.51	426.827
Pdlim5	1463.97	-1.54e-05	0.00144264	0.0676256	0.550047	1335.82	1310.41	1651.27	1518.49	1848.02	1663.2	1733.23	1539.2	1090.29	1220.61	1130.67	1280.21	1582.87	1591.25
Wdr37	471.132	-1.67e-05	0.00144268	0.068616	0.550047	341.661	398.865	497.063	540.54	601.004	686.523	549.343	356.103	487.995	411.116	404.269	411.399	503.431	406.532
Cpne3	1931.5	-1.93e-05	0.0014426	0.0678613	0.550047	1678.8	1932.72	2067.49	1806.54	2328.56	2400.16	2144.68	1790.3	1636.91	1701.21	1715.65	2001.51	1857.75	1978.75
Golph3	3050.12	-2e-05	0.00144257	0.067922	0.550047	2992.98	2944.5	3157.67	3701.99	3571.61	3080.16	3096.5	2642.07	2784.35	2933.4	2489.19	2960.99	3381.95	2964.32
Smchd1	271.206	-3.29e-05	0.00144281	0.068132	0.550047	270.837	263.126	300.159	247.155	299.178	376.787	309.426	273.273	199.301	273.306	183.564	217.879	294.955	287.934
Ppp1ca	2621.18	-3.43e-05	0.00144286	0.0676235	0.550047	2297.2	2496.56	2342.84	2247.51	2288.85	2145.02	2292.66	1882.91	4087.14	2683.26	4738.38	2814.84	2450.75	1928.65
Scly	2172.73	-0.000138481	0.00144594	0.0679315	0.550047	2029.64	1932.72	2072.3	2059.03	2016.14	1921.91	2009.02	1980.09	2683.24	2447.01	3042.02	2530.65	1907.17	1787.22
Cyp3a25	10775.3	-0.0018599	0.00455995	0.0674011	0.550047	9958.02	13289.9	10295.9	7711.58	10278	9130.7	8662.8	13361	10033.9	9551.8	11558.8	12439.4	11404.4	13178.4
1810019D21Rik	807.809	6.1e-06	0.00144269	0.0687396	0.550221	870.22	967.926	745.995	453.413	481.863	714.412	354.27	1358.54	1044.87	657.786	914.249	1388.47	281.057	1076.26
Fbxw8	1352.04	2.91e-05	0.00144247	0.0688499	0.550495	1288.61	1272.82	1199.84	1390.47	1293.35	1228.27	1420.44	1446.59	1346.75	1537.92	1378.52	1404.71	1321.89	1398.44
A930004D18Rik	37.4919	3.8e-06	0.00144269	0.0688372	0.550495	37.3795	66.8255	31.2165	21.3371	15.8856	21.3611	11.2111	60.0027	33.7053	63.6941	28.5703	44.6585	26.2526	62.7873
Ppp1r16a	803.979	1.64e-05	0.00144263	0.0690421	0.551649	832.185	702.712	773.209	771.691	718.822	706.105	716.388	783.948	917.372	784.016	1158.52	925.648	710.363	754.716
Creb1	802.475	-1.37e-05	0.00144265	0.0690705	0.551649	724.637	739.258	851.651	737.908	1114.64	1127.39	803.834	724.598	710.743	794.439	590.69	671.23	875.6	768.034
Strn4	596.668	1.93e-05	0.0014426	0.069144	0.551665	583.644	489.706	552.292	672.118	538.786	554.203	534.768	612.419	614.024	686.738	763.541	615.746	565.202	570.159
Ak3	11427.1	9.82e-06	0.00144255	0.0692078	0.551665	10461	10602.3	11296.4	13285.9	14692.8	11956.3	12503.7	9765.44	10192.2	10216.5	11580.2	12078.1	11212.9	10135.4
Rxrg	135.248	6.05e-06	0.00144269	0.0692251	0.551665	158.043	138.872	149.679	42.6742	109.875	77.1375	86.3253	144.137	197.836	196.873	211.42	181.34	43.2395	156.017
Tshz1	916.113	-1.46e-05	0.00144264	0.0691495	0.551665	802.675	906.321	934.895	1104.19	1196.71	1057.97	941.73	997.871	684.365	790.965	634.26	894.523	975.977	903.122
Hmgcs2	76858.3	1.52e-05	0.00144264	0.0694583	0.55204	71565.3	79717.6	69913	65181.3	68241.8	58866	82596.5	95231.4	87674.9	76614.7	77498.3	96899.4	57854.4	88160.9
Zfp667	87.2019	1.01e-05	0.00144267	0.0694149	0.55204	100.334	88.7527	92.8492	49.7865	63.5423	65.2702	76.2353	114.136	73.2725	91.4879	97.1389	110.97	66.4035	130.648
Prnp	1126.3	-1.07e-05	0.00144267	0.069463	0.55204	1153.52	1165.27	1016.54	1429.59	1420.44	1125.02	1488.83	1157.01	611.093	801.387	759.255	941.888	1479.41	1218.96
Prpf40a	832.559	-1.65e-05	0.00144262	0.0693878	0.55204	647.911	867.688	859.655	917.495	1020.65	1011.09	914.824	724.598	833.841	825.707	712.828	734.835	897.22	687.489
Taf4a	410.298	-0.000205985	0.00145008	0.0693561	0.55204	415.109	390.512	417.821	446.301	465.977	454.518	507.862	475.456	294.555	384.481	306.416	362.681	382.978	439.511
Incenp	26.0328	5.42e-06	0.00144268	0.0695139	0.552141	19.6734	28.192	26.414	10.6685	13.238	15.4275	33.6332	44.3498	33.7053	22.0034	36.4271	27.0657	9.26561	44.395
Pgap3	46.1671	8.1e-06	0.00144268	0.0696199	0.55259	34.7563	42.8101	45.6242	26.6714	30.4474	39.1621	54.9343	34.5668	70.3416	62.536	75.7112	54.1315	30.8854	43.7608
Ocstamp	45.5642	8.06e-06	0.00144268	0.0699552	0.55259	55.0855	39.6777	31.2165	44.4523	45.0091	26.1081	30.2699	39.7844	86.4615	44.0068	42.1412	59.5446	37.0624	57.0793
Klrk1	29.5934	7.37e-06	0.00144268	0.0696628	0.55259	26.2312	27.1479	23.2123	19.559	18.5332	30.2616	28.0277	22.8271	51.2907	37.0584	53.5693	25.7124	18.5312	32.345
Man2a1	8090.56	2.18e-06	0.00144263	0.0698229	0.55259	7842.47	8233.11	8519.71	9779.5	10014.5	8631.09	8965.5	8169.5	5576.04	6536.17	4883.37	7318.58	9501.88	9296.32
Fbxl16	10.3585	-1.8e-06	0.00144268	0.069968	0.55259	13.7714	4.1766	9.60509	10.6685	5.29519	6.52702	7.84775	16.3051	5.8618	15.055	12.8566	9.47301	12.3541	15.2212
Pard3b	193.368	-7.87e-06	0.00144268	0.0699666	0.55259	169.847	207.786	157.684	231.152	263.436	211.238	301.578	161.746	87.927	129.704	182.136	144.802	288.778	169.335
Cab39	3465.54	-9.42e-06	0.00144257	0.0699016	0.55259	3132.66	3437.34	3693.96	4073.61	4179.23	4048.53	3274.75	2644.68	3473.12	3241.45	3028.45	3532.08	3754.11	3003.64
Ptbp3	4216.59	-9.44e-06	0.00144267	0.0699137	0.55259	3290.05	4220.45	4415.14	4930.65	6343.64	5765.73	3884.64	2482.94	4113.52	3631.72	3768.42	3998.96	5258.23	2928.17
Haus3	133.949	-1.47e-05	0.00144265	0.0699906	0.55259	118.696	180.638	134.471	128.023	144.294	175.043	131.17	110.222	127.494	142.443	107.139	119.089	129.718	126.843
Dazap1	960.472	-2.81e-05	0.00144267	0.0698187	0.55259	838.087	1006.56	948.502	1052.63	996.82	1106.03	1178.28	1037.66	858.754	824.549	808.539	936.474	940.459	913.27
Igf1	26406.2	-0.000166531	0.00144753	0.069814	0.55259	22083.4	23197.9	28932.9	32987.1	40210.4	35362.2	28109.5	11924.9	26981.9	25881.8	20772.7	24896.4	34914.3	13432
Dkc1	335.019	1.93e-05	0.00144263	0.0700562	0.552752	302.97	344.569	352.186	286.273	305.797	284.815	315.031	404.366	334.123	368.268	376.413	404.633	270.247	340.573
Lsm11	122.527	9.11e-06	0.00144267	0.0700876	0.552752	141.648	135.739	122.465	64.0113	82.0755	96.1252	107.626	148.05	155.338	145.917	155.708	133.975	72.5806	154.114
Ocel1	204.04	9.35e-07	0.00144265	0.0701742	0.552832	197.39	185.859	179.295	152.916	207.836	182.163	162.561	168.921	315.072	217.718	290.703	273.364	155.971	166.799
Por	10904.7	-6.67e-06	0.00144268	0.0701584	0.552832	9489.79	6186.58	8738.23	21699.8	22033.3	10342.4	11086.6	6792.04	9430.17	7387.36	8598.22	10529.9	14167.1	6183.6
Serinc2	299.601	7.28e-06	0.00144268	0.0702537	0.552856	425.601	380.07	275.346	218.705	135.027	163.769	180.498	332.624	402.999	303.415	376.413	366.741	239.361	393.847
Gm166	10.5359	4.49e-06	0.00144269	0.0702286	0.552856	8.52514	12.5298	7.20381	7.11236	9.26659	6.52702	7.84775	9.13084	11.7236	11.5807	22.8562	16.2394	6.17707	10.7817
Lepre1	284.139	1.16e-05	0.00144266	0.0703061	0.552967	329.857	289.229	293.756	256.045	202.541	191.657	226.464	332.624	296.021	411.116	291.417	315.316	214.653	327.255
Aldh6a1	14884.1	0.000252765	0.00145397	0.0704591	0.553625	12157.5	15331.2	15250.5	17231.5	19871.5	16760.2	15951.1	12886.9	12616.1	11451	12055.9	15416.6	17913.5	13483.4
Nr6a1	314.946	1.93e-05	0.00144263	0.0704662	0.553625	290.511	328.907	313.766	257.823	242.255	281.255	341.938	382.843	294.555	296.467	362.128	309.903	353.637	353.258
Npepl1	1269.66	1.47e-05	0.00144264	0.070646	0.554435	1225	1161.09	1110.99	1219.77	1111.99	1230.05	1117.74	1074.18	1483.04	1397.8	1915.64	1408.77	1249.31	1069.92
Kifc5b	9.46949	4.5e-06	0.00144269	0.0706122	0.554435	5.90202	7.30904	7.20381	3.55618	3.97139	11.2739	11.2111	22.1749	8.7927	6.94845	17.1422	5.41315	7.72134	13.9527
Bin3	173.82	1.58e-05	0.00144267	0.0707203	0.554606	191.488	156.622	156.883	154.694	166.799	123.42	155.834	158.485	234.472	206.137	214.991	198.933	125.086	189.63
Sod1	2197.46	-1.28e-05	0.00144265	0.0707445	0.554606	2268.34	2050.71	2094.71	2843.17	3170.5	2182.4	2180.55	1441.37	2379.89	2076.43	2022.06	2088.12	2378.17	1588.07
Zdhhc18	598.3	1.66e-05	0.00144264	0.0709129	0.554912	674.142	508.501	586.711	520.981	563.938	556.577	464.138	711.554	574.456	706.425	737.113	664.464	467.913	639.289
Thtpa	1050.05	1.62e-05	0.00144265	0.0709449	0.554912	1002.69	1049.37	1101.38	915.717	896.211	936.924	843.073	896.779	1412.69	1303.99	1283.52	1215.25	849.347	993.815
Trpt1	56.9943	1.49e-05	0.00144269	0.0709808	0.554912	40.6584	49.075	55.2292	46.2304	35.7426	56.9631	63.9031	54.7851	89.3924	66.0102	77.1397	62.2512	58.6822	41.8582
Dtwd1	164.385	1.24e-05	0.00144266	0.0710465	0.554912	142.96	193.168	151.28	156.472	136.351	142.408	117.716	172.182	230.076	191.082	172.136	219.232	137.44	138.893
Plekhh3	282.463	1.19e-05	0.00144266	0.0710231	0.554912	312.807	267.302	280.148	218.705	247.55	161.989	300.457	380.234	297.486	319.628	283.56	303.136	240.906	340.573
Deaf1	237.219	1.18e-05	0.00144262	0.071052	0.554912	252.475	248.507	215.314	192.034	213.132	177.416	234.311	279.795	266.712	245.512	304.988	262.538	193.033	235.294
Eepd1	469.971	5.72e-06	0.00144269	0.0710116	0.554912	579.709	612.915	478.653	183.143	300.502	154.275	320.637	903.953	319.468	580.195	345.7	515.602	418.497	866.338
Nek5	4.10989	3.12e-06	0.00144269	0.0711604	0.555159	0	6.26489	4.80254	1.77809	1.3238	1.7801	3.36332	7.17423	1.46545	3.47422	9.9996	5.41315	3.08854	7.61058
Cml5	176.593	-6.48e-06	0.00144269	0.0711247	0.555159	89.8419	135.739	101.654	197.368	410.377	358.393	219.737	80.221	92.3233	152.866	206.42	155.628	214.653	57.0793
Mov10	230.765	7.72e-06	0.00144267	0.0713556	0.555265	210.505	262.081	198.505	156.472	154.884	166.142	273.55	330.667	169.992	229.299	256.418	273.364	193.033	355.795
Snord19	5.50683	-4.34e-06	0.00144269	0.0713656	0.555265	5.90202	3.13245	3.2017	8.89045	9.26659	5.34029	14.5744	3.91322	4.39635	3.47422	1.42851	5.41315	3.08854	5.07372
Pygl	7051.87	-1.05e-05	0.00144267	0.0714427	0.555265	5362.31	6912.27	6777.99	7875.16	9009.77	8709.41	10153.9	7112.27	4068.09	5705.83	5176.22	6365.86	8813.14	6683.99
Pbx3	67.1455	-1.14e-05	0.00144266	0.0713363	0.555265	60.9875	71.0021	86.4458	83.5703	82.0755	70.0171	63.9031	56.0895	48.3598	78.749	49.2837	71.7242	52.5051	65.3241
Pion	307.13	-1.71e-05	0.00144259	0.071393	0.555265	333.136	342.481	320.97	302.275	268.731	367.293	346.422	300.666	235.937	288.36	312.845	270.657	322.752	287.299
Fnip1	2551.05	-2.74e-05	0.00144278	0.0714258	0.555265	2050.62	2502.83	2310.82	3810.45	3402.16	3274.78	2616.66	1630.51	2217.23	2091.48	2182.05	2176.09	3670.72	1778.34
Hs3st3b1	3102.27	-4.26e-05	0.00144295	0.071227	0.555265	2629.68	2714.79	3382.59	4475.45	3431.29	3531.12	3727.68	2090.96	3149.25	3491.59	2356.33	2565.83	3616.67	2268.59
Npr2	1008.97	-6.44e-06	0.00144261	0.0714909	0.555341	830.217	1103.67	1072.57	1018.85	1188.77	1142.23	1264.61	933.303	782.55	1014.47	1162.81	1009.55	869.423	732.518
Elmo2	197.771	1.04e-05	0.00144267	0.0715941	0.555529	243.294	193.168	184.097	135.135	162.827	145.374	165.924	279.795	208.094	243.196	218.563	175.927	134.351	279.055
Mtfr1	2186.41	-2.22e-05	0.00144266	0.0716257	0.555529	1834.87	2094.56	2241.19	2443.1	2691.28	2598.94	2470.92	1675.51	2258.26	2004.63	2302.76	2097.59	2155.8	1740.29
Hnrnph2	1513.59	-2.88e-05	0.00144277	0.0716304	0.555529	1337.79	1497.31	1600.05	1799.43	1939.36	1770.01	1654.75	1715.95	1141.59	1356.1	852.108	1331.63	1581.33	1612.81
Lgals9	5820.43	2.67e-05	0.00144256	0.0725945	0.555545	5368.21	5762.66	5552.54	5565.42	5146.93	4886.96	6552.87	6085.05	5680.08	5898.07	6336.17	6518.78	5778.65	6353.57
Ehd1	1579.27	1.84e-05	0.00144261	0.0721285	0.555545	1733.23	1517.15	1492.79	1271.33	1315.86	1364.15	1657	1599.2	1669.15	1797.33	2032.78	1638.83	1510.29	1510.7
Bcl7a	412.647	1.43e-05	0.00144264	0.0721174	0.555545	380.352	329.951	399.412	330.725	368.016	371.447	473.107	532.198	454.289	537.346	416.412	424.932	307.309	451.561
Slc35b2	1771.8	1.29e-05	0.0014427	0.0725124	0.555545	1483.37	1476.43	1407.15	1674.96	1429.7	1621.67	1374.48	946.999	2844.44	2098.43	3681.99	2162.55	1545.81	1057.24
Slc31a2	313.657	1.27e-05	0.00144266	0.0724341	0.555545	360.679	337.26	321.77	209.815	251.522	274.135	227.585	323.493	435.239	318.47	369.271	385.687	257.893	318.376
Hsdl1	329.747	1.16e-05	0.00144264	0.0722244	0.555545	341.661	352.922	355.388	200.924	281.969	276.508	292.609	350.233	356.104	359.003	408.555	410.046	256.348	374.187
Lrwd1	83.217	1.11e-05	0.00144265	0.0724274	0.555545	91.8092	76.2229	79.242	56.8989	72.8089	70.0171	77.3564	90.004	101.116	111.175	93.5677	92.0235	84.9347	67.861
Tctex1d2	33.4699	1.1e-05	0.0014427	0.0722335	0.555545	24.2639	40.7218	29.6157	19.559	23.8284	37.382	12.3322	23.4793	63.0143	48.6391	33.5701	32.4789	55.5936	24.1002
Efcab4a	62.4158	9.88e-06	0.00144267	0.0725361	0.555545	65.578	50.1192	46.4246	55.1208	48.9805	61.71	56.0554	62.6115	101.116	70.6425	88.5679	40.5986	67.9478	58.3478
Dgcr8	190.757	9.88e-06	0.00144267	0.0725471	0.555545	177.716	183.77	182.497	138.691	123.113	189.877	182.741	221.097	240.334	244.354	267.132	220.586	95.7446	202.949
Gtdc2	150.67	8.2e-06	0.00144267	0.0724169	0.555545	186.897	173.329	155.282	64.0113	90.0183	110.959	130.048	138.267	203.698	211.928	178.564	175.927	131.263	159.188
Azi1	61.0851	5.34e-06	0.00144268	0.072112	0.555545	59.676	79.3553	50.4267	17.7809	27.7998	32.0417	79.5986	104.352	60.0834	79.9071	82.8538	59.5446	35.5182	86.2532
Chst1	5.50696	3.54e-06	0.00144269	0.0724956	0.555545	4.59046	2.0883	9.60509	3.55618	2.6476	0.593365	3.36332	13.6963	5.8618	2.31615	6.42831	9.47301	4.6328	8.24479
Trim45	26.6123	1.78e-06	0.00144269	0.0724761	0.555545	31.4774	38.6335	30.4161	3.55618	9.26659	14.8341	10.09	52.1762	19.0508	40.5326	34.2843	27.0657	12.3541	48.8345
Clpx	2588.35	-5.75e-06	0.00144267	0.07207	0.555545	1943.73	2236.57	2011.47	4238.97	5014.55	3174.5	1995.57	2303.58	2160.07	2254.77	1774.21	2155.79	2792.04	2181.07
Fads1	10567.5	-6.78e-06	0.00144268	0.0726796	0.555545	9513.4	7297.56	8729.42	14911.1	18898.5	13308	13719	9087.8	3711.98	6081.05	8158.96	8493.23	15200.2	10834.9
Rassf2	61.084	-8.77e-06	0.00144268	0.0727079	0.555545	83.2841	73.0904	52.0276	83.5703	60.8947	70.0171	60.5398	56.0895	63.0143	39.3745	34.2843	33.8322	74.1248	71.0321
Pitpnc1	1030.18	-8.95e-06	0.00144267	0.0721616	0.555545	833.496	906.321	1151.81	956.613	1261.58	1361.18	1599.82	1098.96	625.747	858.133	630.689	832.271	1224.6	1081.34
Galt	528.155	-9e-06	0.00144264	0.072629	0.555545	484.621	478.22	476.252	549.43	460.682	461.638	460.775	450.672	760.569	548.927	757.827	583.267	471.002	450.293
Inpp4a	691.332	-9.46e-06	0.00144268	0.0724751	0.555545	504.295	606.651	501.866	1070.41	916.068	884.707	988.817	742.859	543.682	484.075	500.694	462.824	853.98	617.725
Gm5077	60.8903	-9.47e-06	0.00144267	0.0723785	0.555545	59.676	63.6931	70.4373	58.677	66.1899	63.4901	94.173	58.0461	41.0326	61.3779	32.8558	47.365	69.492	65.9584
Cadps2	431.936	-1.05e-05	0.00144267	0.0718924	0.555545	354.121	387.379	407.416	572.545	569.233	604.046	459.654	271.969	369.293	398.378	409.269	399.22	552.848	291.739
Nat6	2112.71	-1.06e-05	0.00144265	0.0726663	0.555545	2091.94	1700.92	1980.25	2747.15	2540.37	2722.95	2378.99	2596.42	1428.81	1752.17	1688.5	2097.59	1816.06	2035.83
Fcho2	1456.8	-1.1e-05	0.00144267	0.0726715	0.555545	916.125	1546.38	1512	1753.2	1964.52	2184.18	1452.96	1143.31	1582.69	1121.02	1134.95	1269.38	1714.14	1100.36
Magi3	959.185	-1.39e-05	0.00144265	0.0717301	0.555545	921.371	996.118	1094.18	1068.63	1219.22	995.073	995.543	1041.57	599.369	909.088	663.545	920.235	1071.72	932.93
Epc1	397.065	-1.57e-05	0.00144262	0.0717335	0.555545	360.679	380.07	370.596	432.076	463.329	466.385	508.983	377.626	350.243	337	385.699	297.723	430.851	397.653
G3bp2	2871.4	-1.8e-05	0.00144268	0.0726784	0.555545	2361.46	2538.33	2898.33	4004.26	3697.37	3714.47	2648.06	2513.59	2794.61	2618.41	2082.06	2575.3	3080.81	2672.58
Fam179b	566.184	-4.03e-05	0.00144286	0.0719853	0.555545	520.689	602.474	615.526	526.315	684.404	686.523	602.035	522.415	466.013	574.405	402.841	556.201	577.556	589.186
Clcn3	1679.24	-0.000204645	0.00144999	0.0728073	0.556011	1655.19	1559.96	1793.75	1786.98	2157.79	1935.56	1789.29	1699.64	1178.22	1502.02	1209.24	1545.45	1846.94	1849.37
Ing2	241.29	1.73e-05	0.00144262	0.0730055	0.556231	210.505	229.713	219.316	206.259	272.702	229.632	211.889	302.622	221.283	244.354	284.989	270.657	247.083	227.049
Gapdhs	100.546	1.1e-05	0.00144267	0.0730284	0.556231	100.99	86.6644	104.856	69.3455	86.0469	104.432	70.6298	118.701	156.803	110.017	129.995	106.91	63.315	98.9375
Tox2	4.26164	3.55e-06	0.00144269	0.0729014	0.556231	3.2789	2.0883	1.60085	5.33427	3.97139	1.7801	3.36332	6.52203	7.32725	11.5807	2.85703	2.70657	1.54427	5.70793
Fbxo30	616.898	-9.99e-06	0.00144267	0.07298	0.556231	471.506	490.75	676.358	844.593	849.878	920.903	571.765	405.018	603.765	517.659	574.977	495.303	775.222	438.877
Nol10	110.021	-1.49e-05	0.00144264	0.073023	0.556231	129.189	105.459	130.469	122.688	131.056	99.092	112.111	107.614	108.443	107.701	80.711	106.91	94.2003	104.645
Npr1	187.78	2.12e-07	0.00144267	0.0731055	0.556233	218.375	107.547	170.49	122.688	115.17	179.79	204.042	295.448	193.439	274.464	180.707	146.155	114.276	306.326
Doc2g	33.8504	-7.67e-06	0.00144268	0.0731052	0.556233	37.3795	37.5894	35.2186	37.3399	30.4474	59.3365	36.9965	37.8278	23.4472	24.3196	37.1414	41.9519	10.8099	24.1002
Mfsd12	123.245	1.09e-05	0.00144266	0.0732377	0.556653	146.239	110.68	139.274	64.0113	96.6373	105.026	107.626	113.483	161.199	133.179	146.423	133.975	117.364	150.309
Pex12	386.795	-3.15e-05	0.00144271	0.0732232	0.556653	407.239	455.249	440.233	380.511	386.549	413.576	383.419	348.929	375.155	382.164	388.556	433.052	299.588	320.913
Rcc1	169.754	1.93e-05	0.00144269	0.0734698	0.556669	142.304	150.357	156.883	147.582	148.265	184.537	145.744	153.268	237.403	182.976	224.991	189.46	185.312	127.477
Rap2a	977.884	1.61e-05	0.00144261	0.0743175	0.556669	875.466	1085.91	998.929	725.461	794.279	983.206	912.581	941.129	1087.36	1153.44	1174.95	1106.99	912.662	938.004
Thoc3	606.139	1.6e-05	0.00144266	0.073966	0.556669	541.018	535.648	578.706	595.66	510.986	533.435	597.55	575.243	786.947	677.473	856.394	701.003	480.267	515.617
Lpin3	129.045	1.46e-05	0.00144264	0.0743067	0.556669	137.058	129.474	107.257	122.688	103.256	99.092	134.533	172.182	127.494	135.495	125.709	121.796	149.794	140.796
Gorasp2	1625.94	1.37e-05	0.0014426	0.0742056	0.556669	1663.06	1711.36	1588.04	1555.83	1400.58	1205.72	1497.8	1917.48	1588.55	1989.57	1484.23	1810.7	1468.6	1881.72
Med25	419.479	1.32e-05	0.00144261	0.0736616	0.556669	427.569	312.201	404.214	423.186	364.045	347.119	450.685	440.237	398.602	508.395	445.696	526.429	361.359	462.977
Pth1r	130.552	9.66e-06	0.00144267	0.0737757	0.556669	157.387	104.415	110.458	104.907	68.8375	121.64	136.775	127.832	142.149	192.24	192.849	120.443	101.922	145.869
Rilpl2	327.9	9.41e-06	0.00144268	0.0737515	0.556669	329.857	314.289	312.165	286.273	271.379	240.313	200.678	222.401	565.664	404.168	567.12	426.285	236.273	213.73
Magix	457.512	8.86e-06	0.00144268	0.0740624	0.556669	369.204	429.145	446.637	380.511	447.444	428.41	284.761	326.102	718.07	563.982	754.255	558.907	387.611	310.131
Tmem86a	479.455	8.65e-06	0.00144268	0.0737698	0.556669	643.976	625.445	450.639	327.169	293.883	281.255	276.914	405.018	707.812	543.137	591.405	526.429	481.812	557.475
9330159M07Rik	38.451	8.54e-06	0.00144267	0.0733724	0.556669	41.3141	44.8984	28.8153	28.4495	29.1236	29.6683	33.6332	54.7851	46.8944	30.1099	38.5699	50.0716	29.3411	52.6398
Tex12	52.4178	4.24e-06	0.00144269	0.0736873	0.556669	32.1332	39.6777	52.0276	32.0056	41.0377	44.5024	47.0865	35.219	118.701	78.749	96.4247	70.3709	26.2526	19.6607
Cybrd1	8.17817	2.29e-06	0.00144269	0.0741951	0.556669	0.65578	15.6622	0.800424	1.77809	1.3238	3.56019	7.84775	7.82644	11.7236	40.5326	5.71406	0	13.8984	3.17107
Selenbp2	5219.3	-2.41e-06	0.00144269	0.0742311	0.556669	474.129	2915.26	838.844	27804	2871.32	18559.9	1973.15	336.537	1274.94	8138.95	1232.81	962.187	5332.36	355.795
Wac	1112.26	-6.19e-06	0.00144251	0.0740335	0.556669	1040.07	1019.09	1117.39	1217.99	1297.32	1225.3	1297.12	1067.66	968.662	1045.74	930.677	1105.64	1204.53	1034.4
Dancr	50.6163	-6.65e-06	0.00144268	0.0741751	0.556669	46.5604	41.766	62.4331	72.9017	59.5709	68.237	59.4187	18.9139	68.8761	37.0584	44.9982	70.3709	30.8854	26.637
Ces1d	8689.28	-6.87e-06	0.00144268	0.0740181	0.556669	6884.38	5805.47	5779.86	9500.34	21433.6	11827.5	10261.5	6004.18	4661.6	5028.36	8466.8	8141.37	11194.4	6660.53
Gm12359	20.045	-7.22e-06	0.00144268	0.0738991	0.556669	19.6734	19.8388	19.2102	14.2247	30.4474	36.1953	22.4221	19.5661	20.5163	16.213	14.9994	20.2993	9.26561	17.758
Mrps36	37.803	-8.69e-06	0.00144268	0.0742763	0.556669	47.2162	53.2516	58.4309	40.8961	38.3901	33.8218	26.9066	41.741	33.7053	27.7938	25.7132	40.5986	27.7968	32.9792
Mrpl38	960.461	-9.44e-06	0.00144267	0.0733125	0.556669	916.125	814.436	789.218	1941.68	1064.33	965.405	1016.84	740.903	876.339	880.136	932.82	913.469	925.016	669.731
Edem3	1584.62	-1.15e-05	0.00144262	0.07391	0.556669	1535.18	1802.2	1747.33	1799.43	1739.47	1679.82	1658.12	1489.63	1090.29	1676.89	1039.96	1542.75	1672.44	1711.11
A830080D01Rik	90.7874	-1.15e-05	0.00144266	0.0741063	0.556669	80.6609	78.3112	99.2526	90.6826	103.256	132.914	109.869	94.5694	93.7888	78.749	65.7116	81.1972	94.2003	67.861
Rps4x	363.612	-1.19e-05	0.00144266	0.0738873	0.556669	430.192	395.732	376.199	432.076	468.625	307.957	375.571	259.577	416.188	364.793	212.134	316.669	375.257	359.6
Art4	87.4025	-1.25e-05	0.00144268	0.0740261	0.556669	126.566	69.958	76.0403	106.685	82.0755	119.266	99.7786	80.8732	65.9452	74.1167	62.1404	63.6045	95.7446	100.84
Cnst	470.944	-1.52e-05	0.00144263	0.0742088	0.556669	513.476	439.587	449.838	478.306	559.967	598.705	494.408	498.935	338.519	414.591	392.841	428.992	529.684	455.366
Nup153	910.469	-1.61e-05	0.00144263	0.0743099	0.556669	834.808	793.553	1079.77	812.587	1081.54	1116.12	1104.29	908.519	786.947	873.188	775.683	737.541	928.105	913.904
Snrk	2068.49	-7e-05	0.00144346	0.0737642	0.556669	2072.26	1835.61	2158.74	2391.53	2286.2	2511.12	2404.78	2145.1	1361.4	1869.13	1618.51	1798.52	2520.24	1985.73
Dnlz	749.542	-8.73e-05	0.00144396	0.0733205	0.556669	749.556	643.196	687.564	723.683	598.357	713.225	611.004	616.984	1094.69	825.707	1154.95	803.852	670.212	600.602
Pofut1	561.432	2.01e-05	0.00144262	0.0743716	0.556786	540.363	610.827	575.505	464.082	493.777	499.613	492.166	508.066	640.402	632.309	692.115	637.398	509.608	563.817
Ring1	390.781	1.56e-05	0.00144263	0.0746863	0.55721	368.548	399.909	346.584	408.961	357.426	338.812	319.516	418.062	482.133	434.278	517.836	395.16	355.182	328.523
Dcxr	1037.57	1.01e-05	0.00144268	0.0746812	0.55721	821.692	779.979	829.239	1043.74	1113.31	825.964	869.979	704.379	1651.56	1079.33	1872.07	1276.15	1005.32	653.241
Ap1s3	21.7658	6.02e-06	0.00144268	0.0745508	0.55721	20.3292	19.8388	19.2102	8.89045	13.238	23.7346	19.0588	26.0881	21.9817	39.3745	13.5709	28.419	26.2526	24.7344
Mutyh	6.8221	4.13e-06	0.00144269	0.0747678	0.55721	3.93468	8.35319	7.20381	1.77809	3.97139	3.56019	5.60554	5.86983	10.2581	6.94845	18.5707	9.47301	6.17707	3.80529
Gata3	4.73614	-3.99e-06	0.00144269	0.0748319	0.55721	3.2789	7.30904	5.60297	8.89045	1.3238	10.6806	7.84775	5.21762	2.9309	1.15807	4.28554	2.70657	0	5.07372
Col27a1	1189.54	-5.65e-06	0.00144269	0.074808	0.55721	712.177	854.114	664.352	1545.16	1543.55	2782.88	1883.46	1279.62	408.861	635.783	814.967	1217.96	1343.51	967.178
Yod1	454.574	-9.01e-06	0.00144267	0.0747471	0.55721	314.119	511.633	448.237	481.863	544.081	737.553	534.768	350.233	445.497	311.522	322.13	377.567	656.314	328.523
Grk4	39.7955	-9.59e-06	0.00144267	0.0746579	0.55721	55.7413	45.9426	40.8216	37.3399	42.3615	51.0294	34.7543	37.8278	32.2399	40.5326	26.4275	51.4249	30.8854	29.8081
Brix1	360.012	-1.52e-05	0.00144261	0.0746996	0.55721	361.991	393.644	395.409	380.511	439.501	377.38	339.696	318.927	338.519	440.068	322.13	342.382	313.486	276.518
2021-09-07	1045.09	-4.63e-05	0.00144301	0.074852	0.55721	821.036	1098.44	1171.82	1228.66	1265.55	1420.52	1000.03	810.036	1135.72	852.343	695.686	966.247	1270.93	894.243
Zfp280d	324.103	-6.2e-05	0.00144325	0.0746956	0.55721	278.051	338.304	328.174	332.503	350.807	434.343	363.239	270.012	345.846	257.092	290.703	335.615	316.575	296.178
Spty2d1	770.864	-1.21e-05	0.00144265	0.0749164	0.557403	638.73	754.92	769.207	977.95	1041.83	952.351	761.232	658.073	657.987	734.219	529.979	673.937	996.053	645.631
Rhof	8.97023	5.27e-06	0.00144269	0.0750499	0.557498	11.1483	8.35319	4.80254	5.33427	5.29519	5.34029	7.84775	8.47864	16.1199	15.055	9.9996	8.11972	10.8099	8.87901
Dyx1c1	8.08427	4.33e-06	0.00144269	0.0750834	0.557498	7.21358	3.13245	12.0064	0	3.97139	6.52702	7.84775	9.78305	4.39635	9.26459	12.8566	18.946	7.72134	9.51322
Spata3	7.34274	3.16e-06	0.00144269	0.0750322	0.557498	7.21358	7.30904	12.0064	0	2.6476	1.18673	2.24221	6.52203	10.2581	13.8969	19.9992	13.5329	1.54427	4.4395
Ube4a	2394.97	-1.81e-05	0.00144261	0.0750281	0.557498	2329.99	2582.18	2727.84	2339.97	2509.92	2714.05	2618.91	2654.47	1935.86	2262.88	1839.21	2314.12	2041.52	2658.63
2510002D24Rik	625.337	1.46e-05	0.0014427	0.0756266	0.558404	493.802	621.269	513.072	650.781	465.977	564.884	483.197	493.065	1107.88	636.941	1067.81	729.422	532.772	393.847
Chst12	24.1745	7.46e-06	0.00144268	0.0753265	0.558404	28.8543	17.7505	19.2102	14.2247	14.5618	20.1744	28.0277	33.2624	19.0508	20.8453	25.7132	21.6526	37.0624	38.0529
Brip1	54.945	7.15e-06	0.00144268	0.0754671	0.558404	34.1006	69.958	25.6136	24.8933	55.5995	54.5896	59.4187	87.3952	33.7053	52.1133	73.5685	58.1913	74.1248	65.9584
Pld6	35.3318	6.29e-06	0.00144269	0.0755574	0.558404	39.3468	37.5894	34.4182	26.6714	14.5618	26.1081	23.5433	58.6983	45.4289	30.1099	49.998	50.0716	9.26561	48.8345
9130206I24Rik	5.97034	5.32e-06	0.00144269	0.0753359	0.558404	5.90202	7.30904	5.60297	1.77809	2.6476	4.15356	2.24221	11.0875	14.6545	4.6323	9.9996	5.41315	3.08854	5.07372
Arhgef10l	521.909	5.31e-06	0.00144263	0.0753954	0.558404	544.953	434.366	479.454	421.408	509.662	402.302	523.557	493.065	606.696	770.119	685.687	583.267	410.775	441.414
Pgp	866.651	2.37e-06	0.00144265	0.0755315	0.558404	901.042	779.979	661.15	965.503	782.365	655.669	625.578	620.897	1280.8	876.662	1375.66	977.073	966.712	664.023
Lpin1	9560.19	-2.5e-06	0.00144269	0.0752749	0.558404	4155.68	6855.88	5442.88	25206.2	19073.3	16184.6	17049.8	3578.64	2013.53	738.851	2059.2	4873.19	23312.3	3298.55
Hsd17b1	7.64147	-4.48e-06	0.00144269	0.075606	0.558404	8.52514	10.4415	12.8068	10.6685	3.97139	15.4275	5.60554	7.17423	4.39635	8.10652	9.28534	6.76643	0	3.80529
Mgea5	2124.79	-1.12e-05	0.00144266	0.0756687	0.558404	1889.96	2107.09	2021.87	2700.92	2639.65	2891.47	2123.38	2351.84	1406.83	1634.04	1396.37	1835.06	2308.68	2439.82
Adprm	399.187	-1.94e-05	0.00144261	0.0756063	0.558404	366.581	406.174	402.613	391.18	479.215	482.406	434.99	341.102	383.948	341.632	401.412	357.268	449.382	350.721
Tcta	500.833	-0.000176136	0.00144811	0.0756665	0.558404	575.119	600.386	529.881	264.936	325.654	399.335	339.696	519.806	785.481	420.381	674.973	676.643	365.991	533.375
Suv420h1	886.372	1.54e-05	0.00144264	0.075847	0.558701	814.479	920.939	916.485	890.823	1056.39	1051.44	1045.99	1063.09	675.572	790.965	698.543	806.559	684.111	993.815
Ctnnbip1	366.078	1.22e-05	0.00144265	0.0757656	0.558701	383.631	389.468	393.809	300.497	252.845	291.936	319.516	391.974	354.639	496.814	483.552	384.333	285.69	396.384
Zfp385a	331.663	5.3e-06	0.00144268	0.0758635	0.558701	439.373	360.231	354.588	145.803	177.389	153.682	258.976	566.112	233.007	363.635	342.129	445.231	182.224	620.896
Rbm8a	285.5	-4.06e-06	0.00144262	0.0758427	0.558701	267.558	264.17	316.968	353.84	361.397	339.405	261.218	260.881	254.988	305.732	197.135	328.849	260.981	223.878
Brwd1	1165.61	-6.86e-05	0.00144339	0.0759107	0.558764	964.652	1180.93	1165.42	1452.7	1333.06	1298.28	1328.51	1314.84	923.233	1021.42	988.532	1051.5	1169.01	1126.37
H2-Q4	1266.1	1.1e-05	0.00144257	0.0759539	0.558798	1421.08	1366.79	1061.36	1137.98	1129.2	1129.17	1068.42	1457.67	1302.79	1175.45	1367.09	1211.19	1559.71	1337.56
Dus1l	1008.52	1.09e-05	0.00144266	0.076098	0.559574	1022.36	1027.44	915.685	954.835	849.878	694.831	882.312	996.566	1374.59	1046.9	1674.93	994.666	815.373	868.874
Rara	693.232	1.07e-05	0.00144266	0.0762212	0.559626	763.984	617.092	613.925	611.663	602.328	460.451	682.754	1097.01	580.318	753.906	644.974	724.008	559.025	993.815
Atp2a3	26.8183	8.13e-06	0.00144268	0.0761972	0.559626	30.1659	19.8388	20.811	17.7809	19.857	22.5479	29.1488	26.0881	39.5671	31.268	28.5703	17.5927	38.6067	33.6134
Mga	1047.8	-1.72e-05	0.00144269	0.076178	0.559626	1064.33	1010.74	1179.02	942.388	1184.8	1272.77	1418.2	1111.35	718.07	934.566	634.974	786.26	1216.88	1194.86
Tmx4	887.607	5.07e-05	0.00144305	0.0764844	0.560839	732.506	848.893	856.454	1159.32	1008.73	1120.87	977.606	635.246	836.772	873.188	852.108	818.739	983.699	722.371
Chst4	9.79484	3.24e-06	0.00144269	0.0765175	0.560839	0.65578	6.26489	3.2017	8.89045	6.61899	3.56019	17.9377	9.78305	10.2581	22.0034	8.57108	2.70657	27.7968	8.87901
Pard6a	92.963	-1.23e-06	0.00144264	0.076619	0.560839	89.8419	77.267	82.4437	81.7922	74.1327	89.5981	88.5675	75.6556	137.752	85.6975	124.281	108.263	105.01	81.1795
Dbi	2086.09	-1e-05	0.00144267	0.0766035	0.560839	2165.39	1496.27	1743.32	2972.97	3011.64	2549.1	2297.15	1569.85	1597.34	1578.46	1763.5	1748.45	2816.74	1895.03
Uchl5	196.574	-1.35e-05	0.00144266	0.0766006	0.560839	156.076	199.432	182.497	261.379	255.493	237.939	213.01	151.963	145.08	155.182	179.993	212.466	234.729	166.799
Trappc8	1062.54	-1.57e-05	0.00144256	0.0766137	0.560839	1022.36	1096.36	1211.04	1025.96	1229.81	1129.17	1146.89	1072.87	874.874	982.047	913.535	912.115	1051.65	1206.91
Bloc1s5	669.644	1.68e-05	0.00144262	0.0766676	0.560911	674.142	681.829	689.965	513.868	590.414	588.025	630.062	612.419	687.296	669.367	833.538	868.81	619.251	716.029
Sucla2	2678.14	2.99e-05	0.00144277	0.0767295	0.560955	2309.66	2800.41	2677.42	3323.25	3370.39	3321.66	2522.49	2015.31	2258.26	2623.04	2377.05	2546.89	3351.06	1997.14
Cfh	21137.4	2.61e-05	0.00144272	0.0769621	0.560955	22936.6	23674	24910	19119.8	23891.9	23645.6	21088	14915.9	19087.5	22407.6	18290	19664.6	26051.8	16240.3
Pskh1	1298	1.49e-05	0.00144261	0.0768252	0.560955	1306.31	1172.58	1334.31	1070.41	1168.91	1176.05	1234.34	1155.7	1456.66	1492.76	1773.5	1458.84	1176.73	1194.86
Plekhg5	177.448	8.31e-06	0.00144268	0.0768994	0.560955	180.339	148.269	133.671	193.812	119.142	106.212	195.073	320.232	126.029	163.288	171.422	156.981	183.768	286.031
Tns1	6245.33	-6.19e-06	0.00144268	0.0768356	0.560955	5863.98	5212.39	4704.09	14041.6	6808.29	6482.51	8391.49	6362.24	3034.95	3710.47	2840.6	4035.5	9379.88	6566.66
Mif	594.061	-1.25e-05	0.00144265	0.0768183	0.560955	671.519	516.854	524.278	919.273	786.336	542.929	574.007	488.5	517.304	500.288	516.408	592.74	660.947	505.469
Hbp1	1987.8	-2.32e-05	0.00144255	0.076974	0.560955	1892.58	2024.6	1905.01	2078.59	2227.95	2054.82	2407.02	1870.52	1814.23	1732.48	1762.79	1971.74	2134.18	1952.75
Preb	1903.11	-5.73e-05	0.00144314	0.076984	0.560955	1850.61	1969.27	1782.54	1998.57	1621.65	1510.71	1713.05	2092.92	2204.04	2299.94	2162.06	2036.7	1488.67	1912.79
Plin2	13352.5	8.93e-06	0.00144264	0.0773068	0.562175	15888.9	12203	11243.6	12542.7	13005	9062.47	11040.7	16729.7	16329.5	16115.8	10448.1	13528.8	11563.5	17233.5
Isyna1	115.065	-8.21e-06	0.00144267	0.077271	0.562175	146.239	96.0617	80.8428	216.927	137.675	132.914	99.7786	106.309	90.8579	112.333	114.281	108.263	69.492	98.9375
Prdm2	1354.13	-1.16e-05	0.00144265	0.0772677	0.562175	1138.43	1374.1	1439.16	1237.55	1564.73	1617.51	1968.66	1488.33	893.924	1133.75	1109.96	1147.59	1493.31	1350.88
Rbm18	475.493	-1.34e-05	0.00144266	0.0772189	0.562175	389.533	436.454	453.04	657.894	648.661	581.498	469.744	397.844	454.289	371.742	389.984	430.345	588.366	387.505
Scara5	920.411	-2.47e-06	0.00144269	0.0773552	0.562208	422.322	390.512	397.01	3305.47	1460.15	2068.47	996.664	172.182	597.904	150.55	344.986	369.447	2094.03	116.061
Irgm2	1785.8	-4.46e-05	0.00144301	0.0773891	0.562208	1875.53	2025.65	2012.27	761.023	1305.27	1532.07	1396.9	2027.05	2099.99	2236.24	2295.62	2180.15	1142.76	2110.67
Tmem222	465.209	1.98e-05	0.0014427	0.0775191	0.562448	447.898	437.498	409.017	451.635	436.853	395.181	376.692	353.494	663.849	506.078	670.687	529.135	452.47	382.432
Dennd1c	104.083	1.02e-05	0.00144267	0.0776154	0.562448	112.794	115.901	104.055	76.4579	68.8375	91.9716	77.3564	142.18	108.443	132.02	92.1391	119.089	72.5806	143.333
Saysd1	360.593	8.35e-06	0.00144268	0.0775419	0.562448	337.727	284.009	331.375	350.284	293.883	286.595	251.128	211.314	663.849	458.597	649.974	423.579	301.132	204.851
Pex19	4263.99	3.48e-06	0.00144263	0.0776166	0.562448	3983.21	3672.27	3928.48	4039.82	3872.11	3743.54	3928.36	3342.54	6591.59	4435.42	5945.47	4667.49	3893.1	3652.44
Got1	4861.2	-4.28e-06	0.00144269	0.0775187	0.562448	2834.28	2729.41	3965.3	14692.4	7960	4386.16	5995.68	2165.97	2779.96	3605.08	2422.76	2117.89	10420.7	1981.29
Mfsd7c	162.73	5.95e-06	0.00144269	0.0777296	0.562985	194.111	171.24	213.713	85.3484	93.9897	68.8304	94.173	197.618	285.763	214.244	189.278	194.873	55.5936	219.438
Sec14l4	5974.64	-9.26e-06	0.00144267	0.0777812	0.563077	5071.15	4235.07	5168.34	9425.66	9091.85	6465.9	7280.47	4635.21	4781.76	5442.95	4621.96	5399.61	7560.73	4464.24
Errfi1	41637.4	-8.32e-06	0.00144268	0.0779345	0.563587	30996.8	35672.3	40651.1	52034	56745.9	50569.5	63562.3	30195.7	26007.3	37886.4	35930.7	31204.1	64870.1	26597.1
Tmem55a	490.453	-1.56e-05	0.00144263	0.0779583	0.563587	491.835	599.342	601.919	417.851	599.681	538.182	423.779	422.628	517.304	416.907	452.839	522.369	410.775	450.927
Alg6	222.569	-2e-05	0.00144267	0.0779686	0.563587	195.422	247.463	233.724	224.039	256.817	258.114	262.339	238.054	172.923	195.715	170.707	179.987	251.716	228.952
Ddx39	161.64	1.37e-05	0.00144264	0.0781044	0.56369	158.699	121.121	145.677	188.478	137.675	141.814	145.744	153.92	222.748	165.605	172.136	196.227	172.958	140.161
Tusc1	155.657	8.57e-06	0.00144268	0.078105	0.56369	170.503	155.578	172.091	101.351	137.675	110.366	98.6574	142.18	240.334	201.505	228.562	185.4	94.2003	140.796
[truncated: 12,461 more rows]
